# Supplementary material
Source: publisher figshare collection journal article supplement (https://tandf.figshare.com/articles/dataset/_/12123729)

# Supporting Information

## Synthesis of Various Acylating Agents Directly from Carboxylic Acids

Fathima Pilathottathil,<sup>‡</sup> Doppalapudi Vineet Kumar,<sup>‡</sup> Alagiri Kaliyamoorthy\*

\*School of Chemistry, Indian Institute of Science Education and Research, Thiruvananthapuram, Vithura, Kerala 695551, India.

### Contents

|                                                                                      |         |
|--------------------------------------------------------------------------------------|---------|
| 1. General information.....                                                          | S2      |
| 2. A. General procedure for the synthesis of Weinreb amides.....                     | S2      |
| 3. Procedure for a gram-scale synthesis of Weinreb amide ( <b>2a</b> ).....          | S2      |
| 4. Characterization data of synthesized compounds.....                               | S2-S14  |
| 5. B. General procedure for synthesis of <i>N</i> -methyl-2-amino pyridine amides... | S14     |
| 6. Characterization data of synthesized compounds.....                               | S14-S16 |
| 7. C. General procedure for the synthesis of 2,3-Dihydro-7-azaindole amides.....     | S16     |
| 8. Characterization data of synthesized compounds.....                               | S17-S18 |
| 9. References.....                                                                   | S19-S20 |
| 10. <sup>1</sup> H and <sup>13</sup> C NMR spectra of the products.....              | S21-S57 |

## EXPERIMENTAL SECTION

**General information.** Unless otherwise noted, all reactions were carried out in a reaction vessel with a teflon coated magnetic stirring bar under open atmosphere. Reagents and solvents were obtained from commercial suppliers and used without further purification. Literature procedures were followed for the synthesis of carboxylic acid precursors for **2v**,<sup>1</sup> **2w**,<sup>2</sup> **3f**,<sup>3</sup> *N*-methyl-2-amino pyridine.<sup>4</sup> Merck silica gel aluminium plates with F-254 indicator was used to perform analytical thin layer chromatography (TLC) and examined under UV. Column chromatography was performed with Finar silica gel 230-400 mesh. <sup>1</sup>H and <sup>13</sup>C NMR were recorded in CDCl<sub>3</sub> on Bruker spectrometer (500 and 125 MHz) using tetramethylsilane as the internal standard. Spin multiplicities were described as s (singlet), d (doublet), dd (double doublet), t (triplet), and m (multiplet). IR was recorded using Bruker Alpha spectrometer. HRMS was recorded using Thermo Scientific Q Exactive TM Bench top LC-HRMS instrument. **Melting points were uncorrected and determined using Stuart Melting Point SMP50 apparatus.**

**A. General procedure for the synthesis of Weinreb amides.** To a mixture of benzoic acid (50 mg, 0.41 mmol, 1 equiv), PPh<sub>3</sub> (160 mg, 0.61 mmol, 1.5 equiv) and NBS (108.5 mg, 0.61 mmol, 1.5 equiv), CH<sub>2</sub>Cl<sub>2</sub> (2 ml) was added and the reaction was stirred at 0 °C for 15 min. The reaction was brought to room temperature and *N,O*-dimethylhydroxylamine hydrochloride (59.5 mg, 0.61 mmol, 1.5 equiv) and Et<sub>3</sub>N (45.5 mg, 63 μl, 0.45 mmol, 1.1 equiv) were added and reaction was stirred for 1 h at room temperature. The reaction mixture was quenched with aqueous sodium bicarbonate solution and diluted with CH<sub>2</sub>Cl<sub>2</sub>. The bicarbonate washings were again extracted with CH<sub>2</sub>Cl<sub>2</sub> and the combined organic layers were dried over anhydrous Na<sub>2</sub>SO<sub>4</sub> and concentrated under reduced pressure. Column chromatography was performed using EtOAc/Petroleum ether (1:5).

**Procedure for a gram-scale synthesis of Weinreb amide (2a).** To a mixture of benzoic acid (1 g, 8.1 mmol), PPh<sub>3</sub> (3.18 g, 12.15 mmol, 1.5 equiv) and NBS (2.16 g, 12.15 mmol, 1.5 equiv), CH<sub>2</sub>Cl<sub>2</sub> (40 ml) was added and the reaction was stirred at 0 °C for 15 min. The reaction was brought to room temperature and *N,O*-dimethylhydroxylamine hydrochloride (1.18 g, 12.15 mmol, 1.5 equiv) and Et<sub>3</sub>N (0.9 g, 1.24 ml, 8.91 mmol, 1.1 equiv) were added and reaction was stirred for 1 h at room temperature. The reaction mixture was quenched with aqueous sodium bicarbonate solution and diluted with CH<sub>2</sub>Cl<sub>2</sub>. The bicarbonate washings were again extracted with CH<sub>2</sub>Cl<sub>2</sub> and the combined organic layers were dried over anhydrous Na<sub>2</sub>SO<sub>4</sub> and concentrated under reduced pressure. Column chromatography was performed using EtOAc/Petroleum ether (1:5). The product **2a** was obtained as a clear oil in 75% (1.002 g) yield.

### Characterization data of synthesized compounds.

***N*-methoxy-*N*-methylbenzamide (2a).**<sup>5</sup>

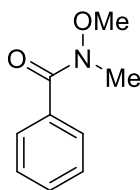

Prepared according to the general procedure A using benzoic acid (50 mg, 0.41 mmol). Yield: 97% (66 mg). The title compound was obtained as a pale yellow oil.  $^1\text{H}$  NMR (500 MHz,  $\text{CDCl}_3$ ):  $\delta$  (ppm) 7.60-7.58 (m, 2H), 7.39 - 7.31 (m, 3H), 3.47 (s, 3H), 3.28 (s, 3H).  $^{13}\text{C}$   $\{^1\text{H}\}$  NMR (125 MHz,  $\text{CDCl}_3$ ):  $\delta$  (ppm) 170.1, 134.2, 130.6, 128.2, 128.1, 61.1, 33.9. HRMS (m/z): calculated for  $\text{C}_9\text{H}_{11}\text{NO}_2$  (M + H): 166.0860, found (M + H) 166.0825. The data is in accordance with reported literature.

#### **N-methoxy-N-methyl-1-naphthamide (2b).<sup>6</sup>**

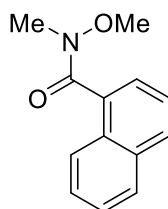

Prepared according to the general procedure A using 1-naphthoic acid (50 mg, 0.29 mmol). Yield: 93% (49 mg). The title compound was obtained as a pale yellow oil.  $^1\text{H}$  NMR (500 MHz,  $\text{CDCl}_3$ ):  $\delta$  (ppm) 7.82-7.78 (m, 3H), 7.46-7.38 (m, 4H), 3.30 (brs, 6H). HRMS (m/z): calculated for  $\text{C}_{13}\text{H}_{13}\text{NO}_2$  (M + H): 216.1019, found (M + H) 216.1017. The data is in accordance with reported literature.

#### **N-methoxy-N-methyl-2-naphthamide (2c).<sup>7a</sup>**

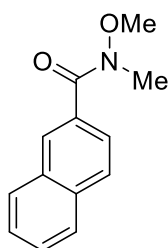

Prepared according to the general procedure A using 2-naphthoic acid (50 mg, 0.29 mmol). Yield: 93% (57.8 mg). The title compound was obtained as a pale yellow oil.  $^1\text{H}$  NMR (500 MHz,  $\text{CDCl}_3$ ):  $\delta$  (ppm) 8.22 (s, 1H), 7.90 (d,  $J = 7.5$  Hz, 1H), 7.86 (d,  $J = 8.5$  Hz, 2H), 7.75 (d,  $J = 7.5$  Hz, 1H), 7.56-7.52 (m, 2H), 3.56 (s, 3H), 3.41 (s, 3H).  $^{13}\text{C}$  NMR (125 MHz,  $\text{CDCl}_3$ ):  $\delta$  (ppm) 170.0, 134.3, 132.6, 131.5, 128.9, 128.8, 127.8, 127.7, 127.5, 126.5, 125.1, 61.2, 33.9. HRMS (m/z): Calculated for  $\text{C}_{13}\text{H}_{13}\text{NO}_2$  (M+H): 216.1019, found (M+H) 216.1017. The data is in accordance with reported literature.

#### **N-methoxy-N,4-dimethylbenzamide (2d).<sup>5</sup>**

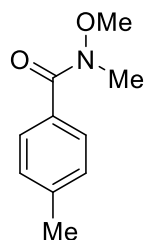

Prepared according to the general procedure A using 4-methylbenzoic acid (50 mg, 0.37 mmol). Yield: 81% (54 mg). The title compound was obtained as a yellow oil.  $^1\text{H NMR}$  (500 MHz,  $\text{CDCl}_3$ ):  $\delta$  (ppm) 7.59 (d,  $J = 8.0$  Hz, 2H), 7.19 (d,  $J = 7.5$  Hz, 2H), 3.55 (s, 3H), 3.34 (s, 3H), 2.38 (s, 3H). HRMS ( $m/z$ ): calculated for  $\text{C}_{10}\text{H}_{13}\text{NO}_2$  ( $M + H$ ): 180.1033, found ( $M + H$ ) 180.1035. The data is in accordance with reported literature.

**N-methoxy-N,3,5-trimethylbenzamide (2e).<sup>8</sup>**

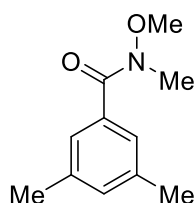

Prepared according to the general procedure A using 3,5-dimethylbenzoic acid (50 mg, 0.33 mmol). Yield: 62% (38 mg). The title compound was obtained as a yellow oil.  $^1\text{H NMR}$  (500 MHz,  $\text{CDCl}_3$ ):  $\delta$  (ppm) 7.23 (s, 2H), 7.07 (s, 1H), 3.57 (s, 3H), 3.33 (s, 3H), 2.33 (s, 6H). HRMS ( $m/z$ ): calculated for  $\text{C}_{11}\text{H}_{15}\text{NO}_2$  ( $M + H$ ): 194.1175, found ( $M + H$ ) 194.1190. The data is in accordance with reported literature.

**N,2-dimethoxy-N-methylbenzamide (2f).<sup>9</sup>**

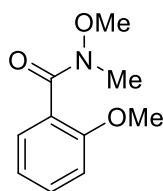

Prepared according to the general procedure A using 2-methoxybenzoic acid (50 mg, 0.32 mmol). Yield: 86% (53.7 mg). The title compound was obtained as a pale yellow oil.  $^1\text{H NMR}$  (500 MHz,  $\text{CDCl}_3$ ):  $\delta$  (ppm) 7.36 (d,  $J = 7.5$  Hz, 1H), 7.26 (s, 1H), 6.98 (d,  $J = 6.5$  Hz, 1H), 6.92 (d,  $J = 8.0$  Hz, 1H), 3.84 (s, 3H), 3.48 (brs, 3H), 3.31 (brs, 3H). HRMS ( $m/z$ ): Calculated for  $\text{C}_{10}\text{H}_{13}\text{NO}_3$  ( $M+H$ ): 196.0968, found ( $M+H$ ) 196.0966. The data is in accordance with reported literature.

**N,4-dimethoxy-N-methylbenzamide (2g).<sup>5</sup>**

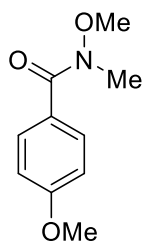

Prepared according to the general procedure A using 4-methoxybenzoic acid (50 mg, 0.32 mmol). Yield (52.9 mg, 82%). The title compound was obtained as a colourless oil.  $^1\text{H}$  NMR (500 MHz,  $\text{CDCl}_3$ ):  $\delta$  (ppm) 7.71 (d,  $J = 8.5$  Hz, 2H), 6.89 (d,  $J = 8.5$  Hz, 2H), 3.83 (s, 3H), 3.55 (s, 3H), 3.34 (s, 3H).  $^{13}\text{C}$  NMR (125 MHz,  $\text{CDCl}_3$ ):  $\delta$  (ppm) 169.5, 161.6, 130.6, 126.1, 113.3, 60.9, 55.4, 34.0. HRMS ( $m/z$ ): Calculated for  $\text{C}_{10}\text{H}_{13}\text{NO}_3$  ( $M+H$ ): 196.0968, found ( $M+H$ ) 196.0966. The data is in accordance with reported literature.

**N,3,5-trimethoxy-N-methylbenzamide (2h).**<sup>6</sup>

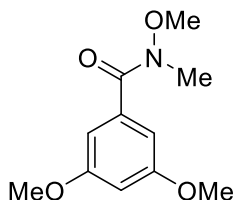

Prepared according to the general procedure A using 3,5-dimethoxybenzoic acid (50 mg, 0.27 mmol). Yield: 87% (52.9 mg). The title compound was obtained as a pale yellow oil.  $^1\text{H}$  NMR (500 MHz,  $\text{CDCl}_3$ ):  $\delta$  (ppm) 6.78 (s, 2H), 6.53 (s, 1H), 3.80 (s, 6H), 3.59 (s, 3H), 3.33 (s, 3H).  $^{13}\text{C}$  NMR (125 MHz,  $\text{CDCl}_3$ ):  $\delta$  (ppm) 169.7, 160.5, 136.1, 106.0, 102.9, 61.2, 55.6, 34.1. HRMS ( $m/z$ ): Calculated for  $\text{C}_{11}\text{H}_{15}\text{NO}_4$  ( $M+H$ ) 226.1073, found ( $M+H$ ) 226.1070. The data is in accordance with reported literature.

**4-(dimethylamino)-N-methoxy-N-methylbenzamide (2i).**<sup>10</sup>

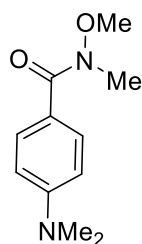

Prepared according to the general procedure A using 4-dimethylaminobenzoic acid (50 mg, 0.30 mmol). Yield: 77% (49 mg). The title compound was obtained as a yellow oil.  $^1\text{H}$  NMR (500 MHz,  $\text{CDCl}_3$ ):  $\delta$  (ppm) 7.72 (d,  $J = 8.5$  Hz, 2H), 6.65 (d,  $J = 8.5$  Hz, 2H), 3.59 (s, 3H), 3.34 (s, 3H), 3.01 (s, 6H). HRMS ( $m/z$ ): calculated for  $\text{C}_{11}\text{H}_{16}\text{N}_2\text{O}_2$  ( $M + H$ ): 209.1384, found ( $M + H$ ) 209.1301. The data is in accordance with reported literature.

#### 4-fluoro-N-methoxy-N-methylbenzamide (2j).<sup>11b</sup>

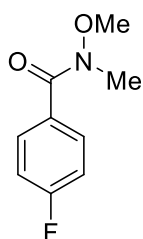

Prepared according to the general procedure A using 4-fluorobenzoic acid (50 mg, 0.36 mmol). Yield: 75% (49 mg). The title compound was obtained as a yellow oil. <sup>1</sup>H NMR (500 MHz, CDCl<sub>3</sub>): δ (ppm) 7.68 - 7.65 (m, 2H), 7.01 (t, *J* = 8.5 Hz, 2H), 3.46 (s, 3H), 3.29 (s, 3H). HRMS (*m/z*): calculated for **C<sub>9</sub>H<sub>10</sub>FNO<sub>2</sub>** (*M* + *H*): 184.0768, found (*M* + *H*) 184.0768. The data is in accordance with reported literature.

#### 4-chloro-N-methoxy-N-methylbenzamide (2k).<sup>5</sup>

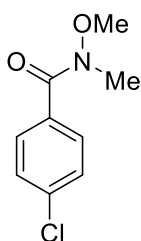

Prepared according to the general procedure A using 4-chlorobenzoic acid (50 mg, 0.32 mmol). Yield: 85% (42 mg). The title compound was obtained as a yellow oil. <sup>1</sup>H NMR (500 MHz, CDCl<sub>3</sub>): δ (ppm) 7.65 (d, *J* = 8.5 Hz, 2H), 7.38 (d, *J* = 8.5 Hz, 2H), 3.53 (s, 3H), 3.35 (s, 3H). <sup>13</sup>C NMR (125 MHz, CDCl<sub>3</sub>): δ (ppm) 168.8, 136.9, 132.4, 130.0, 128.4, 61.2, 33.6. HRMS (*m/z*): calculated for **C<sub>9</sub>H<sub>10</sub>ClNO<sub>2</sub>** (*M* + *H*): 200.0478, found (*M* + *H*) 200.0482. The data is in accordance with reported literature.

#### 4-bromo-N-methoxy-N-methylbenzamide (2l).<sup>11b</sup>

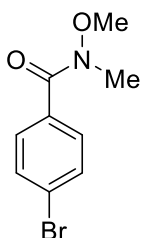

Prepared according to the general procedure A using 4-bromobenzoic acid (50 mg, 0.25 mmol). Yield: **83%** (42 mg). The title compound was obtained as a yellow oil. <sup>1</sup>H NMR (500 MHz, CDCl<sub>3</sub>): δ (ppm) 7.58 (d, *J* = 8.5 Hz, 2H), 7.53 (d, *J* = 8.5 Hz, 2H), 3.53 (s, 3H), 3.35 (s, 3H). <sup>13</sup>C NMR (125 MHz, CDCl<sub>3</sub>): δ (ppm) 168.8, 132.9, 131.4, 130.1, 125.3, 61.2, 33.6. HRMS (*m/z*): calculated for **C<sub>9</sub>H<sub>10</sub>BrNO<sub>2</sub>** (*M* + *H*): 243.9967, found (*M* + *H*) 243.9969. The data is in accordance with reported literature.

**2-iodo-N-methoxy-N-methylbenzamide (2m).**<sup>11a</sup>

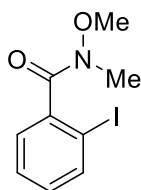

Prepared according to the general procedure A using 2-iodobenzoic acid (50 mg, 0.20 mmol). Yield: 97% (43 mg). The title compound was obtained as a yellow oil. <sup>1</sup>H NMR (500 MHz, CDCl<sub>3</sub>): δ (ppm) 7.75 (d, *J* = 8.0 Hz, 1H), 7.31 (t, *J* = 7.5 Hz, 1H), 7.19 (d, *J* = 7.5 Hz, 1H), 7.02 (t, *J* = 8.0 Hz, 1H), 3.39 (m, 1+2 H), 3.32 (m, 2+1 H). <sup>13</sup>C NMR (125 MHz, CDCl<sub>3</sub>): δ (ppm) 170.8, 141.7, 138.9, 130.3, 127.7, 127.2, 92.5, 61.5, 32.6. HRMS (*m/z*): calculated for C<sub>9</sub>H<sub>10</sub>INO<sub>2</sub> (*M* + *H*): 291.9828, found (*M* + *H*) 291.9847. The data is in accordance with reported literature.

**4-iodo-N-methoxy-N-methylbenzamide (2n).**<sup>12</sup>

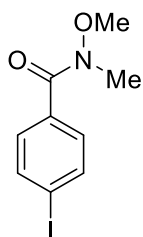

Prepared according to the general procedure A using 4-iodobenzoic acid (50 mg, 0.20 mmol). Yield: 81% (48 mg). The title compound was obtained as a yellow oil. <sup>1</sup>H NMR (500 MHz, CDCl<sub>3</sub>): δ (ppm) 7.75 (d, *J* = 8.5 Hz, 2H), 7.43 (d, *J* = 8.0 Hz, 2H), 3.53 (s, 3H), 3.35 (s, 3H). <sup>13</sup>C NMR (125 MHz, CDCl<sub>3</sub>): δ (ppm) 169.0, 137.3, 133.5, 130.1, 97.4, 61.2, 33.6. HRMS (*m/z*): calculated for C<sub>9</sub>H<sub>10</sub>INO<sub>2</sub> (*M* + *H*): 291.9834, found (*M* + *H*) 291.9841. The data is in accordance with reported literature.

**N-methoxy-N-methyl-2-nitrobenzamide (2o).**<sup>6</sup>

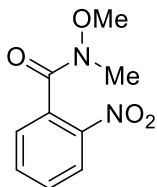

Prepared according to the general procedure A using 2-nitrobenzoic acid (50 mg, 0.30 mmol). Yield: 78% (49.3 mg). The title compound was obtained as a brown oil. <sup>1</sup>H NMR (500 MHz, CDCl<sub>3</sub>): δ (ppm) 8.15 (d, *J* = 8.0 Hz, 1H), 7.72 (t, *J* = 7.5 Hz, 1H), 7.58 (t, *J* = 8.0 Hz, 1H), 7.53 (d, *J* = 7.5 Hz, 1H), 3.36 (s, 3H), 3.33 (s, 3H). <sup>13</sup>C NMR (125 MHz, CDCl<sub>3</sub>): δ (ppm) 168.9, 145.9, 134.0, 131.6, 130.1, 128.5, 124.0, 61.4, 33.5. HRMS (*m/z*): Calculated for C<sub>9</sub>H<sub>10</sub>N<sub>2</sub>O<sub>4</sub> (*M*+*H*): 211.0713, found (*M*+*H*) 211.0712. The data is in accordance with reported literature.

**N-methoxy-N-methyl-4-nitrobenzamide (2p).**<sup>11b</sup>

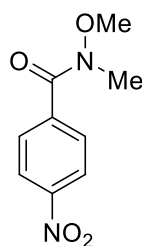

Prepared according to the general procedure A using 4-nitrobenzoic acid (50 mg, 0.30 mmol). Yield: 97% (61.7 mg). The title compound was obtained as a yellow solid, mp = 71.8 °C. <sup>1</sup>H NMR (500 MHz, CDCl<sub>3</sub>): δ (ppm) 8.26 (d, *J* = 7.0 Hz, 2H), 7.83 (d, *J* = 7.5 Hz, 2H), 3.52 (s, 3H), 3.39 (s, 3H). <sup>13</sup>C NMR (125 MHz, CDCl<sub>3</sub>): δ (ppm) 167.7, 148.8, 140.0, 129.2, 123.2, 61.3, 33.1. HRMS (*m/z*): Calculated for C<sub>9</sub>H<sub>10</sub>N<sub>2</sub>O<sub>4</sub> (*M* + *H*): 211.0713, found (*M*+*H*) 211.0711. The data is in accordance with reported literature.

**N-methoxy-N,2-dimethyl-3-nitrobenzamide (2q).**<sup>12</sup>

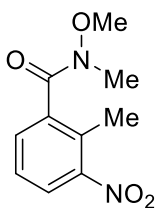

Prepared according to the general procedure A using 2-methyl-3-nitrobenzoic acid (50 mg, 0.28 mmol). Yield: 74% (44.8 mg). The title compound was obtained as a pale yellow solid, mp = 53.0 °C. <sup>1</sup>H NMR (500 MHz, CDCl<sub>3</sub>): δ (ppm) 7.90 (d, *J* = 8.5 Hz, 1H), 7.50 (d, *J* = 7.5 Hz, 1H), 7.39 (t, *J* = 7.8 Hz, 1H), 3.41 (s, 3H), 3.40 (s, 3H), 2.48 (s, 3H). HRMS (*m/z*): Calculated for C<sub>10</sub>H<sub>12</sub>N<sub>2</sub>O<sub>4</sub> (*M*+*H*): 225.0870, found (*M*+*H*): 225.0864. The data is in accordance with reported literature.

**2-chloro-N-methoxy-N-methyl-5-nitrobenzamide (2r).**

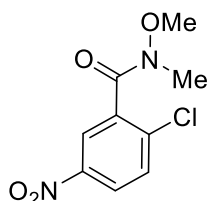

Prepared according to the general procedure A using 2-chloro-5-nitrobenzoic acid (50 mg, 0.25 mmol). Yield: 94% (57 mg). The title compound was obtained as a yellow solid, mp = 101.6 °C. <sup>1</sup>H NMR (500 MHz, CDCl<sub>3</sub>): δ (ppm) 8.23 - 8.20 (m, 2H), 7.60 (d, *J* = 8.5 Hz, 1H), 3.50 (s, 3H), 3.41 (s, 3H). <sup>13</sup>C NMR (125 MHz, CDCl<sub>3</sub>): δ (ppm) 165.9, 146.3, 138.0, 136.7, 130.7, 125.0, 123.1, 61.7, 32.4. IR (ATR,



cm<sup>-1</sup>): 2928, 2863, 1665, 1459, 1358, 745. HRMS (m/z): calculated for C<sub>9</sub>H<sub>9</sub>ClN<sub>2</sub>O<sub>4</sub> (M + H): 245.0323, found (M + H) 245.0341.

**N-methoxy-N-methyl-4-(trifluoromethyl)benzamide (2s).**<sup>5</sup>

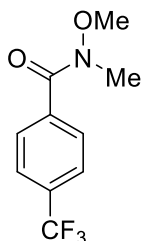

Prepared according to the general procedure A using 4-trifluoromethylbenzoic acid (50 mg, 0.26 mmol). Yield: 95% (57.7 mg). The title compound was obtained as a pale yellow oil. <sup>1</sup>H NMR (500 MHz, CDCl<sub>3</sub>): δ (ppm) 7.78 (d, *J* = 8.0 Hz, 2H), 7.67 (d, *J* = 7.5 Hz, 2H), 3.53 (s, 3H), 3.38 (s, 3H). HRMS (m/z): Calculated for C<sub>10</sub>H<sub>10</sub>F<sub>3</sub>NO<sub>2</sub> (M+H) 234.0736, found (M+H) 234.0733. The data is in accordance with reported literature.

**4-formyl-N-methoxy-N-methylbenzamide (2t).**<sup>13</sup>

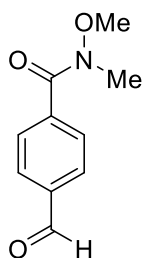

Prepared according to the general procedure A using 4-formylbenzoic acid (50 mg, 0.33 mmol). Yield: 82% (48 mg). The title compound was obtained as a yellow oil. <sup>1</sup>H NMR (500 MHz, CDCl<sub>3</sub>): δ (ppm) 10.07 (s, 1H), 7.93 (d, *J* = 8.0 Hz, 2H), 7.81 (d, *J* = 8.0 Hz, 2H), 3.54 (s, 3H), 3.38 (s, 3H). <sup>13</sup>C NMR (125 MHz, CDCl<sub>3</sub>): δ (ppm) 191.7, 168.8, 139.8, 137.5, 129.4, 128.7, 61.3, 31.0. HRMS (m/z): calculated for C<sub>10</sub>H<sub>11</sub>NO<sub>3</sub> (M + H): 194.0811, found (M + H) 194.0828. The data is in accordance with reported literature.

**4-acetyl-N-methoxy-N-methylbenzamide (2u).**<sup>7a</sup>

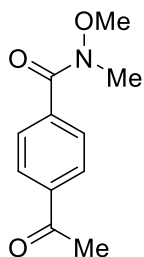

Prepared according to the general procedure A using 4-acetylbenzoic acid. (50 mg, 0.30 mmol). Yield: (50.1 mg, 81%). The title compound was obtained as a pale yellow solid, mp = 41.7 °C. <sup>1</sup>H NMR (500 MHz, CDCl<sub>3</sub>): δ (ppm) 7.97 (d, *J* = 8.0 Hz, 2H), 7.73 (d, *J* = 8.5 Hz, 2H), 3.52 (s, 3H), 3.36 (s, 3H), 2.62 (s, 3H). <sup>13</sup>C NMR (125 MHz, CDCl<sub>3</sub>): δ (ppm) 197.6, 169.0, 138.54, 138.47, 128.45, 128.07, 61.3, 33.5, 26.8. HRMS (m/z): Calculated for C<sub>11</sub>H<sub>13</sub>NO<sub>3</sub> (M+H) 208.0968, found (M+H) 208.0966. The data is in accordance with reported literature.

**4-(allyloxy)-N-methoxy-N-methylbenzamide (2v).**

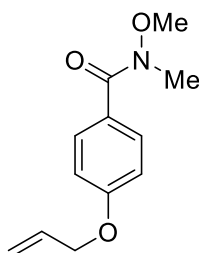

Prepared according to the general procedure A using 4-allyloxybenzoic acid (50 mg, 0.28 mmol). Yield (41.8 mg, 67%). The title compound was obtained as an orange oil. <sup>1</sup>H NMR (500 MHz, CDCl<sub>3</sub>): δ (ppm) 7.70 (d, *J* = 8.5 Hz, 2H), 6.90 (d, *J* = 8.5 Hz, 2H), 6.01- 6.08 (m, 1H), 5.41 (dd, *J* = 17.5, 1.5 Hz, 1H), 5.29 (dd, *J* = 10.5, 1 Hz, 1H), 4.56 - 4.57 (m, 2H), 3.55 (s, 3H), 3.34 (s, 3H). <sup>13</sup>C NMR (125 MHz, CDCl<sub>3</sub>): δ (ppm) 169.5, 160.6, 132.9, 130.6, 126.2, 118.1, 114.1, 68.9, 61.0, 34.0. IR (ATR, cm<sup>-1</sup>): 2903, 1638, 1596, 1415, 1292, 1239, 787. HRMS (m/z): Calculated for C<sub>12</sub>H<sub>15</sub>NO<sub>3</sub> (M+H) 222.1124, found (M+H) 222.1124.

**benzyl 4-(methoxy(methyl)carbamoyl)phenyl)carbamate (2w).**

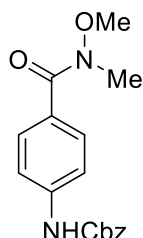

Prepared according to the general procedure A using 4-cbzaminobenzoic acid (50 mg, 0.18 mmol). Yield: 83% (47 mg). The title compound was obtained as a pale yellow solid, mp = 118.5 °C. <sup>1</sup>H NMR (500 MHz, CDCl<sub>3</sub>): δ (ppm) 7.62 (d, *J* = 8.5 Hz, 2H), 7.23-7.41 (m, 7H), 6.91 (s, 1H), 5.13 (s, 2H), 3.47 (s, 3H), 3.27 (s, 3H). <sup>13</sup>C NMR (125 MHz, CDCl<sub>3</sub>): δ (ppm) 169.2, 153.2, 140.2, 135.9, 129.9, 128.7, 128.6, 128.5, 128.4, 117.6, 67.3, 61.1, 33.9. IR (ATR, cm<sup>-1</sup>): 1732, 1610, 1534, 1224, 1060, 750. HRMS (m/z): Calculated for C<sub>17</sub>H<sub>18</sub>N<sub>2</sub>O<sub>4</sub> (M + H): 315.1339, found (M + H) 315.1333.

**N-methoxy-N-methyl-2-oxo-2-phenylacetamide (2x).<sup>14</sup>**

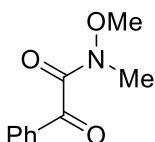

Prepared according to the general procedure A using 2-oxo-2-phenylacetic acid (50 mg, 0.33 mmol). Yield: 75% (48 mg). The title compound was obtained as a white solid, mp = 68.8 °C. <sup>1</sup>H NMR (500 MHz, CDCl<sub>3</sub>): δ (ppm) 7.90 (d, *J* = 8.0 Hz, 2H), 7.62 (d, *J* = 7.5 Hz, 1H), 7.50 (t, *J* = 7.5 Hz, 2H), 3.65 (s, 3H), 3.36 (s, 3H). <sup>13</sup>C NMR (125 MHz, CDCl<sub>3</sub>): δ (ppm) 190.9, 167.3, 134.5, 132.9, 129.5, 129.04, 62.2, 31.5. HRMS (*m/z*): calculated for C<sub>10</sub>H<sub>11</sub>NO<sub>3</sub> (*M* + *H*): 194.0811, found (*M* + *H*) 194.0827. The data is in accordance with reported literature.

**N-methoxy-N-methyl-2-phenylacetamide (3a).**<sup>5</sup>

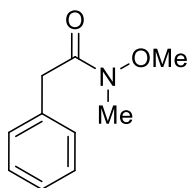

Prepared according to the general procedure A using phenylacetic acid (50 mg, 0.37 mmol). Yield: 94% (66 mg). The title compound was obtained as a yellow oil. <sup>1</sup>H NMR (500 MHz, CDCl<sub>3</sub>): δ (ppm) 7.24-7.14 (m, 5H), 3.69 (s, 2H), 3.51 (s, 3H), 3.11 (s, 3H). HRMS (*m/z*): calculated for C<sub>10</sub>H<sub>13</sub>NO<sub>2</sub> (*M* + *H*): 180.1034, found (*M* + *H*) 180.1033. The data is in accordance with reported literature.

**N-methoxy-N-methyl-2-(*o*-tolyl)acetamide (3b).**<sup>15</sup>

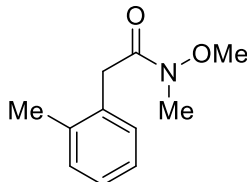

Prepared according to the general procedure A using *o*-tolylacetic acid (50 mg, 0.33 mmol). Yield: 80% (51.3 mg). The title compound was obtained as a pale yellow oil. <sup>1</sup>H NMR (500 MHz, CDCl<sub>3</sub>): δ (ppm) 7.19 - 7.14 (m, 4H), 3.77 (s, 2H), 3.60 (s, 3H), 3.20 (s, 3H), 2.31 (s, 3H). <sup>13</sup>C NMR (125 MHz, CDCl<sub>3</sub>): δ (ppm) 172.7, 136.9, 133.7, 130.3, 130.0, 127.1, 126.1, 61.3, 37.2, 32.5, 19.8. HRMS (*m/z*): Calculated for C<sub>11</sub>H<sub>15</sub>NO<sub>2</sub> (*M*+*H*) 194.1175, found (*M*+*H*) 194.1173. The data is in accordance with reported literature.

**2-(4-chlorophenyl)-N-methoxy-N-methylacetamide (3c).**<sup>16</sup>

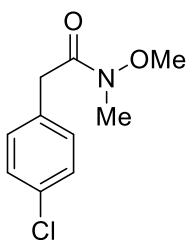

Prepared according to the general procedure A using 4-chlorophenylacetic acid (50 mg, 0.29 mmol). Yield: 80% (50 mg). The title compound was obtained as a pale yellow oil. <sup>1</sup>H NMR (500 MHz, CDCl<sub>3</sub>): δ (ppm) 7.28 (d, *J* = 8.0 Hz, 2H), 7.22 (d, *J* = 7.5 Hz, 2H), 3.73 (s, 2H), 3.63 (s, 3H), 3.18 (s, 3H). <sup>13</sup>C NMR (125 MHz, CDCl<sub>3</sub>): δ (ppm) 171.9, 133.4, 132.8, 130.8, 128.7, 61.4, 38.7, 32.3. HRMS (*m/z*): Calculated for C<sub>10</sub>H<sub>12</sub>ClNO<sub>2</sub> (*M*+*H*) 214.0629, found (*M*+*H*) 214.0627. The data is in accordance with reported literature.

**N-methoxy-N-methyl-2,2-diphenylacetamide (3d).**<sup>13</sup>

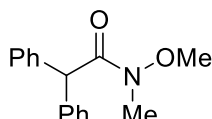

Prepared according to the general procedure A using diphenylacetic acid (50 mg, 0.23 mmol). Yield: 82% (47.9 mg). The title compound was obtained as a pale yellow solid, mp = 110.0 °C. <sup>1</sup>H NMR (500 MHz, CDCl<sub>3</sub>): δ (ppm) 7.31 - 7.29 (m, 8H), 7.25-7.23 (m, 2H), 5.54 (s, 1H), 3.48 (s, 3H), 3.23 (s, 3H). <sup>13</sup>C NMR (125 MHz, CDCl<sub>3</sub>): δ (ppm) 173.2, 139.5, 129.1, 128.5, 127.0, 61.5, 52.9, 32.5. HRMS (*m/z*): Calculated for C<sub>16</sub>H<sub>17</sub>NO<sub>2</sub> (*M*+*H*) 256.1332, found (*M*+*H*) 256.1328. The data is in accordance with reported literature.

**(3r, 5r, 7r)-N-methoxy-N-methyladamantane-1-carboxamide (3e).**<sup>5</sup>

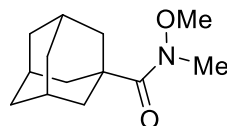

Prepared according to the general procedure A using 1-adamantanecarboxylic acid (50 mg, 0.28 mmol). Yield: 68% (42.4 mg). The title compound was obtained as a pale yellow solid, mp = 45.0 °C. <sup>1</sup>H NMR (500 MHz, CDCl<sub>3</sub>): δ (ppm) 3.66 (s, 3H), 3.15 (s, 3H), 1.98 (s, 9H), 1.70 (s, 6H). HRMS (*m/z*): Calculated for C<sub>13</sub>H<sub>21</sub>NO<sub>2</sub> (*M*+*H*) 224.1645, found (*M*+*H*) 224.1641. The data is in accordance with reported literature.

**(9H-fluoren-9-yl)methyl (S)-(1-(methoxy(methyl)amino)-1-oxopropan-2-yl)carbamate (3f).**<sup>17a</sup>

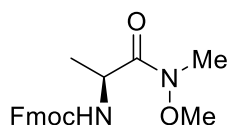

Prepared according to the general procedure A using Fmoc L-alanine (50 mg, 0.16 mmol). Yield: 80% (46 mg). The title compound was obtained as a colourless oil. <sup>1</sup>H NMR (500 MHz, CDCl<sub>3</sub>): δ (ppm) 7.76 - 7.75 (m, 2H), 7.62 - 7.59 (m, 2H), 7.41 - 7.38 (m, 2H), 7.32 - 7.29 (m, 2H), 5.64 (d, *J* = 7.0 Hz, 1H), 4.76 (s, 1H), 4.36 - 4.35 (m, 2H), 4.23 - 4.21 (m, 1H), 3.77 (s, 3H), 3.22 (s, 3H), 1.38 - 1.36 (m,

3H). HRMS (m/z): calculated for C<sub>20</sub>H<sub>22</sub>N<sub>2</sub>O<sub>4</sub> (M + H): 355.1658, found (M + H) 355.1647.  $[\alpha]_D^{25} = +1.9$  (*c* 0.68, CHCl<sub>3</sub>). lit.<sup>16</sup>  $[\alpha]_D^{20} = +2.1$  (*c* 0.68, CHCl<sub>3</sub>). The data is in accordance with reported literature.

**(9H-fluoren-9-yl)methyl (S)-(1-(methoxy(methyl)amino)-4-methyl-1-oxopentan-2-yl)carbamate (3g).**<sup>18</sup>

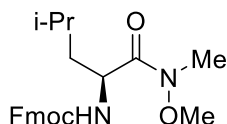

Prepared according to the general procedure A using Fmoc L-leucine (50 mg, 0.14 mmol). Yield: 89% (50 mg). The title compound was obtained as a colourless oil. <sup>1</sup>H NMR (500 MHz, CDCl<sub>3</sub>):  $\delta$  (ppm) 7.76 - 7.75 (m, 2H), 7.62 - 7.58 (m, 2H), 7.41 - 7.38 (m, 2H), 7.32 - 7.29 (m, 2H), 5.41 (d, *J* = 9.0 Hz, 1H), 4.81 (d, *J* = 7.0 Hz, 1H), 4.37 - 4.35 (m, 2H), 4.23 - 4.22 (m, 1H), 3.79 (s, 3H), 3.21 (s, 3H), 1.75 - 1.70 (m, 2H), 1.51 - 1.49 (m, 2H), 0.99 - 0.94 (m, 6H). HRMS (m/z): calculated for C<sub>23</sub>H<sub>28</sub>N<sub>2</sub>O<sub>4</sub> (M + H): 397.2121, found (M + H) 397.2117. The data is in accordance with reported literature.  $[\alpha]_D^{20} = +2.537$  (*c* 0.1, CH<sub>2</sub>Cl<sub>2</sub>).

**(9H-fluoren-9-yl)methyl (S)-(1-(methoxy(methyl)amino)-1-oxopentan-2-yl)carbamate (3h).**<sup>17b</sup>

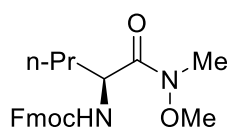

Prepared according to the general procedure A using Fmoc L-norvaline (50 mg, 0.15 mmol). Yield: 94% (53 mg). The title compound was obtained as a colourless oil. <sup>1</sup>H NMR (500 MHz, CDCl<sub>3</sub>):  $\delta$  (ppm) 7.76 - 7.75 (m, 2H), 7.61 - 7.59 (m, 2H), 7.40 - 7.37 (m, 2H), 7.32 - 7.29 (m, 2H), 5.49 (d, *J* = 8.8 Hz, 1H), 4.77 (s, 1H), 4.39 - 4.33 (m, 2H), 4.22 (t, *J* = 7.05 Hz, 1H), 3.78 (s, 3H), 3.22 (s, 3H), 1.75 - 1.69 (m, 1H), 1.62 - 1.55 (m, 1H), 1.47 - 1.42 (m, 2H), 0.94 (t, *J* = 7.25 Hz, 3H). HRMS (m/z): calculated for C<sub>22</sub>H<sub>26</sub>N<sub>2</sub>O<sub>4</sub> (M + H): 383.1965, found (M + H) 383.1961. The data is in accordance with reported literature.  $[\alpha]_D^{20} = -2.920$  (*c* 0.1, CH<sub>2</sub>Cl<sub>2</sub>).

**(9H-fluoren-9-yl)methyl (2-(methoxy(methyl)amino)-2-oxoethyl)carbamate (3i).**<sup>18</sup>

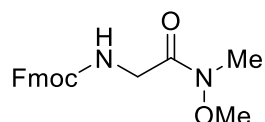

Prepared according to the general procedure A using Fmoc glycine (50 mg, 0.15 mmol). Yield: 78% (45 mg). The title compound was obtained as a colourless gummy oil. <sup>1</sup>H NMR (500 MHz, CDCl<sub>3</sub>):  $\delta$  (ppm) 7.77 - 7.75 (m, 2H), 7.62 - 7.61 (m, 2H), 7.41 - 7.38 (m, 2H), 7.33 - 7.30 (m, 2H), 5.59 (s, 1H),

4.39 (d,  $J = 7$  Hz, 2H), 4.25 – 4.23 (m, 1H), 4.17 (d,  $J = 3$  Hz, 2H), 3.73 (s, 3H), 3.22 (s, 3H). HRMS ( $m/z$ ): calculated for  $C_{19}H_{20}N_2O_4$  ( $M + H$ ): 341.1495, found ( $M + H$ ) 341.1491. The data is in accordance with reported literature.

**(9H-fluoren-9-yl)methyl (S)-(3-(benzyloxy)-1-(methoxy(methyl)amino)-1-oxopropan-2-yl)carbamate (3j).**

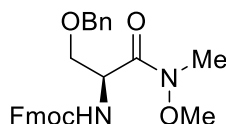

Prepared according to the general procedure A using Fmoc L-O-benzyl serine (50 mg, 0.12 mmol). Yield: 89% (49 mg). The title compound was obtained as a white solid, mp = 95.0 °C.  $^1H$  NMR (500 MHz,  $CDCl_3$ ):  $\delta$  (ppm) 7.77 - 7.75 (m, 2H), 7.63 - 7.60 (m, 2H), 7.41 - 7.38 (m, 2H), 7.34 - 7.27 (m, 7H), 5.77 (d,  $J = 8.5$  Hz, 1H), 4.95 (s, 1H), 4.60 - 4.51 (m, 2H), 4.36 (d,  $J = 7.0$  Hz, 2H), 4.24 - 4.21 (m, 1H), 3.72 (s, 5H), 3.23 (s, 3H).  $^{13}C$  NMR (125 MHz,  $CDCl_3$ ):  $\delta$  (ppm) 156.1, 144.0, 143.9, 141.4, 137.8, 128.5, 127.9, 127.2, 125.36, 125.33, 120.0, 69.6, 67.3, 61.6, 51.5, 47.2, 32.3. IR (ATR,  $cm^{-1}$ ): 3856, 3749, 3311, 3055, 2936, 1716, 1658, 1517, 1450, 1240, 1102, 742, 617, 551. HRMS ( $m/z$ ): calculated for  $C_{27}H_{28}N_2O_5$  ( $M + H$ ): 461.2070, found ( $M + H$ ) 461.2068.  $[\alpha]_D^{20} = +4.804$  ( $c$  0.1,  $CH_2Cl_2$ ).

**B. General procedure for synthesis of *N*-methyl-2-amino pyridine amides.** To a mixture of benzoic acid (50 mg, 0.41 mmol, 1 equiv),  $PPh_3$  (160 mg, 0.61 mmol, 1.5 equiv) and NBS (108.5 mg, 0.61 mmol, 1.5 equiv),  $CH_2Cl_2$  (1.5 ml) was added and the reaction was stirred at 0 °C for 30 min. The reaction was brought to room temperature and DMAP (10 mg, 0.08 mmol, 0.20 equiv) was added and stirred for 10 min. The mixture of *N*-methyl-2-amino pyridine (49 mg, 0.45 mmol, 1.1 equiv),  $Et_3N$  (45.5 mg, 63  $\mu$ l, 0.45 mmol, 1.1 equiv) and  $CH_2Cl_2$  (0.5 ml) were added and the reaction was stirred for 1 h at room temperature. The reaction mixture was diluted with EtOAc and washed with aqueous sodium bicarbonate solution. The bicarbonate washings were again extracted with EtOAc and the combined organic layers were dried over anhydrous  $Na_2SO_4$  and concentrated under reduced pressure. Column chromatography was performed using EtOAc/Petroleum ether (1:5).

### Characterization data of synthesized compounds

***N*-methyl-*N*-(pyridin-2-yl)benzamide (4a).<sup>7</sup>**

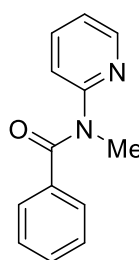

Prepared according to the general procedure B using benzoic acid (50 mg, 0.41 mmol). Yield: 86% (75 mg). The title compound was obtained as a yellow oil.  $^1\text{H}$  NMR (500 MHz,  $\text{CDCl}_3$ ):  $\delta$  (ppm) 8.37 - 8.36 (m, 1H), 7.37 - 7.34 (m, 1H), 7.27 - 7.22 (m, 3H), 7.16 - 7.13 (m, 2H), 6.97 - 6.95 (m, 1H), 6.73 (d,  $J$  = 8.0 Hz, 1H), 3.51 (s, 3H).  $^{13}\text{C}$  NMR (125 MHz,  $\text{CDCl}_3$ ):  $\delta$  (ppm) 171.1, 156.9, 148.8, 137.4, 136.1, 130.2, 128.6, 128.1, 121.7, 121.0, 36.1. HRMS ( $m/z$ ): calculated for  $\text{C}_{13}\text{H}_{12}\text{N}_2\text{O}$  ( $M + H$ ): 213.1022, found ( $M + H$ ) 213.1023. The data is in accordance with reported literature.

**N-methyl-N-(pyridine-2-yl)-1-naphthamide (4b).**<sup>7</sup>

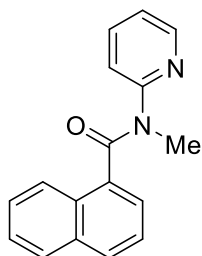

Prepared according to the general procedure B using 1-naphthoic acid (50 mg, 0.29 mmol). Yield: 74% (46 mg). The title compound was obtained as a white solid mp = 170.0 °C.  $^1\text{H}$  NMR (500 MHz,  $\text{CDCl}_3$ ):  $\delta$  (ppm) 8.38 (d,  $J$  = 4.0 Hz, 1H), 8.08 (d,  $J$  = 8.5 Hz, 1H), 7.83 - 7.78 (m, 2H), 7.55 - 7.47 (m, 2H), 7.32 - 7.26 (m, 3H), 6.95 (t,  $J$  = 5.7 Hz, 2H), 3.60 (s, 3H).  $^{13}\text{C}$  NMR (125 MHz,  $\text{CDCl}_3$ ):  $\delta$  (ppm) 170.9, 155.8, 148.5, 137.3, 134.5, 133.5, 130.1, 129.7, 128.4, 127.2, 126.4, 125.6, 125.2, 124.8, 121.0, 120.7, 35.7. HRMS ( $m/z$ ): calculated for  $\text{C}_{17}\text{H}_{14}\text{N}_2\text{O}$  ( $M + H$ ): 263.1178, found ( $M + H$ ) 263.1172. The data is in accordance with reported literature.

**4-methoxy-N-methyl-N-(pyridine-2-yl)benzamide (4c).**<sup>7</sup>

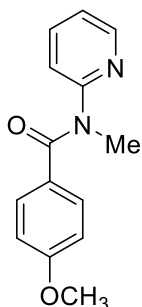

Prepared according to the general procedure B using 4-methoxybenzoic acid (50 mg, 0.33 mmol). Yield: 68% (40 mg). The title compound was obtained as a yellow oil.  $^1\text{H}$  NMR (500 MHz,  $\text{CDCl}_3$ ):  $\delta$  (ppm) 8.36 (s, 1H), 7.36 (t,  $J$  = 7.5 Hz, 1H), 7.23 - 7.21 (m, 2H), 6.96-6.94 (m, 1H), 6.69 (d,  $J$  = 8 Hz, 1H), 6.64 - 6.63 (m, 2H), 3.68 (s, 3H), 3.49 (s, 3H).  $^{13}\text{C}$  NMR (125 MHz,  $\text{CDCl}_3$ ):  $\delta$  (ppm) 170.8, 161.2, 157.4, 148.8, 137.4, 130.8, 128.1, 121.7, 120.7, 113.4, 55.3, 36.1. HRMS ( $m/z$ ): calculated for  $\text{C}_{14}\text{H}_{14}\text{N}_2\text{O}_2$  ( $M + H$ ): 243.1128, found ( $M + H$ ) 243.1126.

**N-methyl-2,2-diphenyl-N-(pyridine-2-yl)acetamide (4d).**<sup>19</sup>

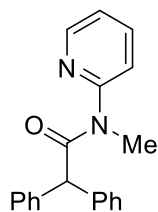

Prepared according to the general procedure B using 2,2-diphenylacetic acid (50 mg, 0.23 mmol). Yield: 58% (25 mg). The title compound was obtained as an off white solid, mp = 122.7 °C. <sup>1</sup>H NMR (500 MHz, CDCl<sub>3</sub>): δ (ppm) 8.52 (s, 1H), 7.64 - 7.61 (m, 1H), 7.25 - 7.19 (m, 12H), 5.21 (s, 1H), 3.40 (s, 3H). HRMS (m/z): calculated for C<sub>20</sub>H<sub>18</sub>N<sub>2</sub>O (M + H): 303.1491, found (M + H) 303.1478. The data is in accordance with reported literature.

**(3r,5r,7r)-N-methyl-N-(pyridine-2-yl)adamantane-1-carboxamide (4e).**

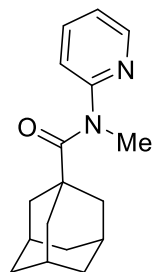

Prepared according to the general procedure B using 1-adamantane carboxylic acid (50 mg, 0.28 mmol). Yield: 81% (62 mg). The title compound was obtained as a white solid, mp = 95.1°C. <sup>1</sup>H NMR (500 MHz, CDCl<sub>3</sub>): δ (ppm) 8.50 - 8.49 (m, 1H), 7.76 - 7.73 (m, 1H), 7.26 - 7.23 (m, 1H), 7.20 (d, *J* = 7.9 Hz, 1H), 3.25 (s, 3H), 1.86 (s, 3H), 1.76 (s, 6H), 1.60 - 1.51 (m, 6H). <sup>13</sup>C NMR (125 MHz, CDCl<sub>3</sub>): δ (ppm) 179.3, 158.0, 149.1, 138.4, 122.6, 122.4, 44.0, 39.9, 39.5, 36.5, 28.5. IR (ATR, cm<sup>-1</sup>): 2909, 2855, 1645, 1585, 1468, 1348, 1281, 1149, 1042, 751, 659, 585. HRMS (m/z): calculated for C<sub>17</sub>H<sub>22</sub>N<sub>2</sub>O (M + H): 271.1804, found (M + H) 271.1799.

**C. General procedure for the synthesis of 2,3-Dihydro-7-azaindole amides.** A reaction tube with a teflon coated magnetic stir bar was charged with benzoic acid (50 mg, 0.41 mmol, 1 equiv), PPh<sub>3</sub> (160 mg, 0.61 mmol, 1.5 equiv) and NBS (108.5 mg, 0.61 mmol, 1.5 equiv). CH<sub>2</sub>Cl<sub>2</sub> (2 ml) was added and the reaction was stirred at 0 °C for 30 min. The reaction was brought to room temperature and 2,3-dihydro-7-azaindole (54 mg, 0.45 mmol, 1.1 equiv) and Et<sub>3</sub>N (45.5 mg, 63 μl, 0.45 mmol, 1.1 equiv) were added and the reaction was stirred for 1 h at room temperature. The reaction mixture was diluted with EtOAc and washed with aqueous sodium bicarbonate solution. The bicarbonate washings were again extracted with EtOAc and the combined organic layers were dried over anhydrous Na<sub>2</sub>SO<sub>4</sub> and concentrated under reduced pressure. Column chromatography was performed using EtOAc/Petroleum ether (1:5).



## Characterization data of synthesized compounds.

### (2,3-dihydro-1H-pyrrolo[2,3-b]pyridin-1-yl)(phenyl)methanone (5a).

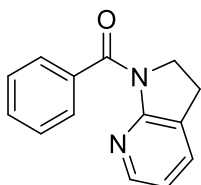

Prepared according to the general procedure C using benzoic acid (50 mg, 0.41 mmol). Yield: 73% (66.8 mg). The title compound was obtained as a white solid, mp = 114.0 °C. <sup>1</sup>H NMR (500 MHz, CDCl<sub>3</sub>): δ (ppm) 7.85 (d, *J* = 5.0 Hz, 1H), 7.59 (d, *J* = 7.0 Hz, 2H), 7.48 - 7.45 (m, 2H), 7.38 (t, *J* = 7.5 Hz, 2H), 6.81 (dd, *J* = 7.5, 5 Hz, 1H), 4.22 (t, *J* = 8.0 Hz, 2H), 3.11 (t, *J* = 8.5 Hz, 2H). <sup>13</sup>C NMR (125 MHz, CDCl<sub>3</sub>): δ (ppm) 169.3, 156.2, 146.3, 136.1, 133.3, 130.7, 128.5, 127.8, 125.8, 118.5, 47.9, 25.1. IR (ATR, cm<sup>-1</sup>): 1643, 1593, 1420, 1379, 1347, 1245, 790, 712. HRMS (m/z): Calculated for C<sub>14</sub>H<sub>12</sub>N<sub>2</sub>O (M+H) 225.1022, found (M+H) 225.1022.

### (2,3-dihydro-1H-pyrrolo[2,3-b]pyridin-1-yl)(4-nitrophenyl)methanone (5b).

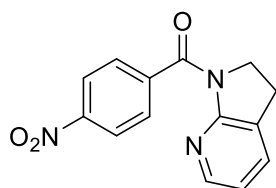

Prepared according to the general procedure C using 4-nitrobenzoic acid (50 mg, 0.30 mmol). Yield: 71% (57.7 mg). The title compound was obtained as an off-white solid, mp = 158.4 °C. <sup>1</sup>H NMR (500 MHz, CDCl<sub>3</sub>): δ (ppm) 8.24 (d, *J* = 9.0 Hz, 2H), 7.76 (d, *J* = 5.0 Hz, 1H), 7.70 (d, *J* = 8.5 Hz, 2H), 7.50 (dd, *J* = 7.5, 1.5 Hz, 1H), 6.85 (dd, *J* = 7.5, 5.0 Hz, 1H), 4.28 (t, *J* = 8.0 Hz, 2H), 3.17 (t, *J* = 8.5 Hz, 2H). <sup>13</sup>C NMR (125 MHz, CDCl<sub>3</sub>): δ (ppm) 167.1, 155.3, 148.9, 146.2, 142.4, 133.8, 129.4, 125.8, 123.1, 119.2, 47.2, 24.9. IR (ATR, cm<sup>-1</sup>): 1650, 1595, 1512, 1426, 1344, 1240, 852, 701. HRMS (m/z): Calculated for C<sub>14</sub>H<sub>11</sub>N<sub>3</sub>O<sub>3</sub> (M+H) 270.0873, found (M+H) 270.0870.

### (2,3-dihydro-1H-pyrrolo[2,3-b]pyridin-1-yl)(2-methyl-3-nitrophenyl)methanone (5c).

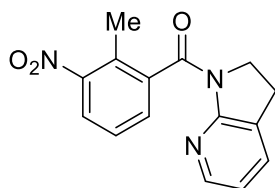

Prepared according to the general procedure C using 2-methyl-3-nitrobenzoic acid (50 mg, 0.27 mmol). Yield: 75% (45.4 mg). The title compound was obtained as a yellow solid, mp = 153.5 °C. <sup>1</sup>H NMR

(500 MHz, CDCl<sub>3</sub>):  $\delta$  (ppm) 7.94 (d,  $J$  = 8.1 Hz, 1H), 7.71 (s, 1H), 7.48 - 7.43 (m, 2H), 7.37 - 7.34 (m, 1H), 6.83 - 6.81 (m, 1H), 4.31 (s, 2H), 3.18 (t,  $J$  = 8.5 Hz, 2H), 2.41 (s, 3H). <sup>13</sup>C NMR (125 MHz, CDCl<sub>3</sub>):  $\delta$  (ppm) 166.8, 154.67, 150.0, 146.71, 141.0, 133.7, 130.8, 130.4, 126.5, 125.5, 124.8, 119.1, 46.0, 24.5, 16.5. IR (ATR, cm<sup>-1</sup>) = 1642, 1591, 1526, 1422, 1346, 797, 733. HRMS (m/z): Calculated for C<sub>15</sub>H<sub>14</sub>N<sub>3</sub>O<sub>3</sub> (M+H) 284.1030, found (M+H) 284.1020.

**1-(2,3-dihydro-1H-pyrrolo[2,3-b]pyridin-1-yl)-2,2-diphenylethan-1-one (5d).**

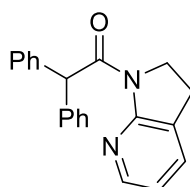

Prepared according to the general procedure C using diphenylacetic acid (50 mg, 0.23 mmol). Yield: 62% (44.5 mg). The title compound was obtained as a pale yellow solid, mp = 170.8 °C. <sup>1</sup>H NMR (500 MHz, CDCl<sub>3</sub>):  $\delta$  (ppm) 8.13 (d,  $J$  = 3.5 Hz, 1H), 7.44-7.41 (m, 5H), 7.37 (s, 1H), 7.29-7.25 (m, 4H), 7.21-7.18 (m, 2H), 6.85 (t,  $J$  = 5.5 Hz, 1H), 4.16 (t,  $J$  = 8.5 Hz, 2H), 3.01 (t,  $J$  = 8.0 Hz, 2H). <sup>13</sup>C NMR (125 MHz, CDCl<sub>3</sub>):  $\delta$  (ppm) 171.9, 155.7, 146.1, 140.2, 133.6, 129.6, 128.3, 126.8, 126.3, 118.2, 54.6, 46.2, 24.0. IR (ATR, cm<sup>-1</sup>): 1655, 1595, 1420, 1236, 805, 706. HRMS (m/z): Calculated for C<sub>21</sub>H<sub>18</sub>N<sub>2</sub>O (M+H) 315.1491, found (M+H) 315.1481.

**((3r,5r,7r)-adamantan-1-yl)(2,3-dihydro-1H-pyrrolo[2,3-b]pyridin-1-yl)methanone (5e).**

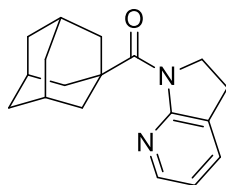

Prepared according to the general procedure C using 1-adamantanecarboxylic acid (50 mg, 0.28 mmol). Yield (58.7 mg, 75%). The title compound was obtained as a yellow solid, mp = 125.6 °C. <sup>1</sup>H NMR (500 MHz, CDCl<sub>3</sub>):  $\delta$  (ppm) 8.12-8.11 (m, 1H), 7.40 (dd,  $J$  = 7.25, 1 Hz, 1H), 6.82 (dd,  $J$  = 7.5, 5.0 Hz, 1H), 4.10 (t,  $J$  = 8.5 Hz, 2H), 2.98 (t,  $J$  = 8.5 Hz, 2H), 2.31 (d,  $J$  = 2 Hz, 6 H), 2.04 (s, 3H), 1.91 (d,  $J$  = 2.5 Hz, 1H), 1.81 (d,  $J$  = 11.5 Hz, 3H), 1.71 (d,  $J$  = 11.5 Hz, 4H). <sup>13</sup>C NMR (125 MHz, CDCl<sub>3</sub>):  $\delta$  (ppm) 179.1, 156.0, 145.4, 133.0, 126.5, 117.6, 49.0, 43.6, 38.7, 36.84, 36.81, 36.56, 28.7, 27.9, 24.8. IR (ATR, cm<sup>-1</sup>): 2904, 2853, 1640, 1597, 1416, 1294, 1240, 787. HRMS (m/z): Calculated for C<sub>18</sub>H<sub>22</sub>N<sub>2</sub>O (M+H) 283.1804, found (M+H) 283.1799.

## Reference

- [1] C. Lin, Y. Jiang, C. -A. Tao, X. Yin, Y. Lan, C. Wang, S. Wang, X. Liu, G. Li, *ACS Appl. Mater. Interfaces* 9 (2017) 11770.
- [2] T. -M. Kuo, M. -Y. Shen, S. -Y. Huang, Y. -K. Li, M. -C. Chuang, *ACS Sens.* 1 (2016) 124.
- [3] M. B. Gawande, P. S. Branco, *Green Chem.* 13 (2011) 3355.
- [4] O. M. Singh, S. J. Singh, S. N. Kim, S. -G. Lee, *Bull. Korean. Chem. Soc.* 28 (2007) 115.
- [5] T. Niu, W. Zhang, D. Huang, C. Xu, H. Wang, Y. Hu, *Org. Lett.* 11 (2009) 4474.
- [6] D. M. Rudzinski, C. B. Kelly, N. E. Leadbeater, *Chem. Commun.* 48 (2012) 9610.
- [7] (a) A. Wieckowska, R. Fransson, L. R. Odell, M. Larhed, *J. Org. Chem.* 76 (2011) 978.  
(b) M. Masahiro, H. Yujiro, I. Hajme, I. Yoshohiko, *Chem. Lett.* 27 (1998) 163.  
(c) J. R. Martinelli, D. M. M. Freckmann, S. L. Buchwald, *Org. Lett.* 8 (2006) 4843.
- [8] C. Veryser, S. V. Mileghem, B. Egle, P. Gilles, W. M. D. Borggraeve, *React. Chem. Eng.* 1 (2016) 142.
- [9] M. P. Sibi, C. C. Stessman, J. A. Schultz, J. W. Christensen, J. Lu, M. Marvin, *Synth. Commun.* 25 (1995) 1255.
- [10] M. Keenan, M. J. Abbott, P. W. Alexander, T. Armstrong, W. M. Best, B. Berven, A. Botero, J. H. Chaplin, S. A. Charman, E. Chatelain, T. W. von Geldern, M. Kerfoot, A. Khong, T. Nguyen, J. D. McManus, J. Morizzi, E. Ryan, I. Scandale, R. A. Thompson, S. Z. Wang, K. L. J. White, *Med. Chem.* 55 (2012) 4189.
- [11] (a) M. Jithunsa, M. Ueda, O. Miyata, *Org. Lett.* 13 (2011) 518.  
(b) C. W. Miur, A. R. Kennedy, J. M. Redmond, A. J. B. Watson, *Org. Biomol. Chem.* 11 (2013) 3337.
- [12] R. Ningegowda, S. Bhaskaran, A. M. Sajith, C. Aswathanarayanappa, M. S. A. Padusha, N. S. Shivananju, B. S. Priya, *Australian Journal of Chemistry* 70 (2016) 44.
- [13] D. Huang, Y. Hu, T. Niu, K. H. Wang, C. Xu, Y. Su, Y. Fu, *Synthesis* 46 (2014) 320.
- [14] F. -H. Zhang, C. Wang, J. -H. Xie, Q. -L. Zhou, *Adv. Synth. Cal.* 361 (2019) 2832.
- [15] H. A. Duong, R. E. Gilligan, M. L. Cooke, R. J. Phipps, M. J. Gaunt, *Angew. Chem. Int. Ed.* 50 (2011) 463.
- [16] J. Gong, S. W. Li, S. Qurban, Q. Kang, *European J. Org. Chem.* 2017 (2017) 3584.
- [17] (a) K. Sharnabai, G. Nagendra, T. Vishwanatha, V. V. Sureshbabu, *Tetrahedron Lett.* 54 (2013) 478.  
(b) J. A. Lera, L. M. M. Jenkins, H. Kajiyama, J. B. Kopp, D. H. Appella, *Bioorg. Med. Chem. Lett.* 20 (2010) 6500.
- [18] G. Wang, U. Mahesh, G. Y. J. Chen, S. Q. Yao, *Org. Lett.* 5 (2003) 737.
- [19] J. W. Lim, K. H. Kim, H. R. Moon, J. N. Kim, *Tetrahedron Lett.* 57 (2016) 784.

# $^1\text{H}$ and $^{13}\text{C}$ NMR of products

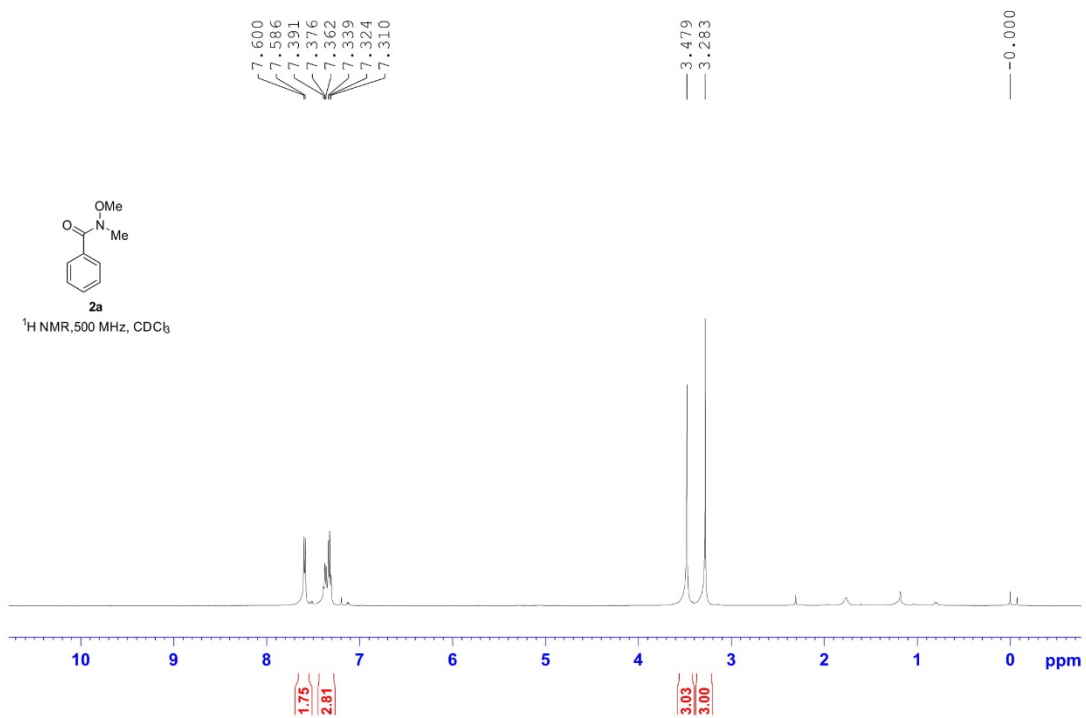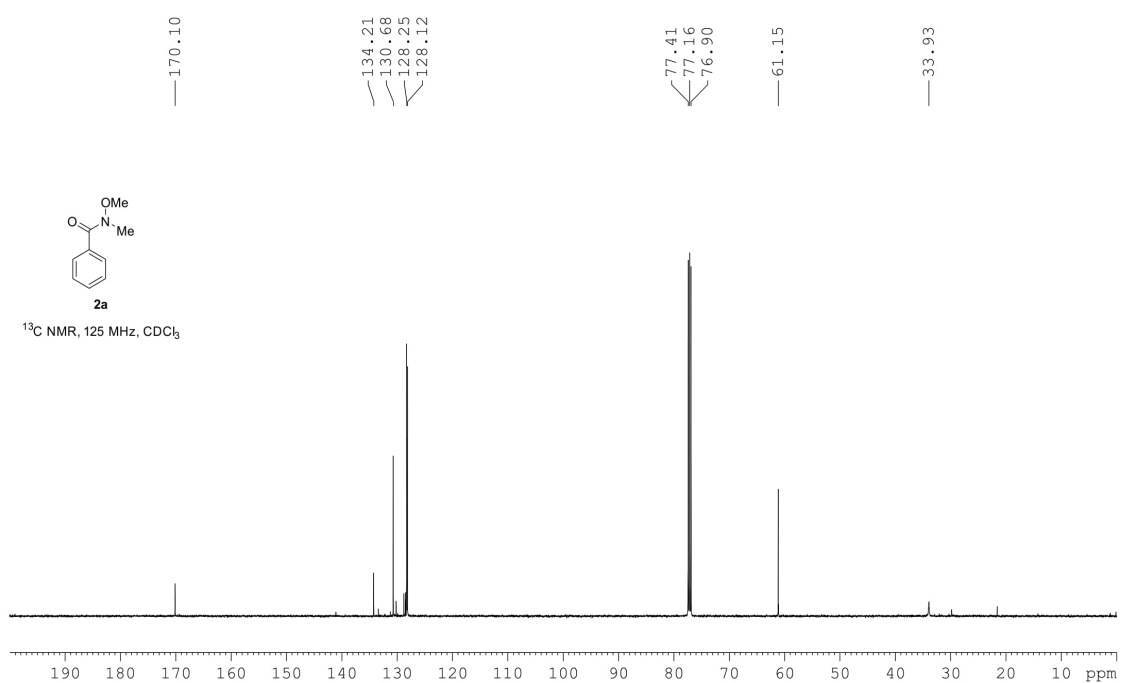

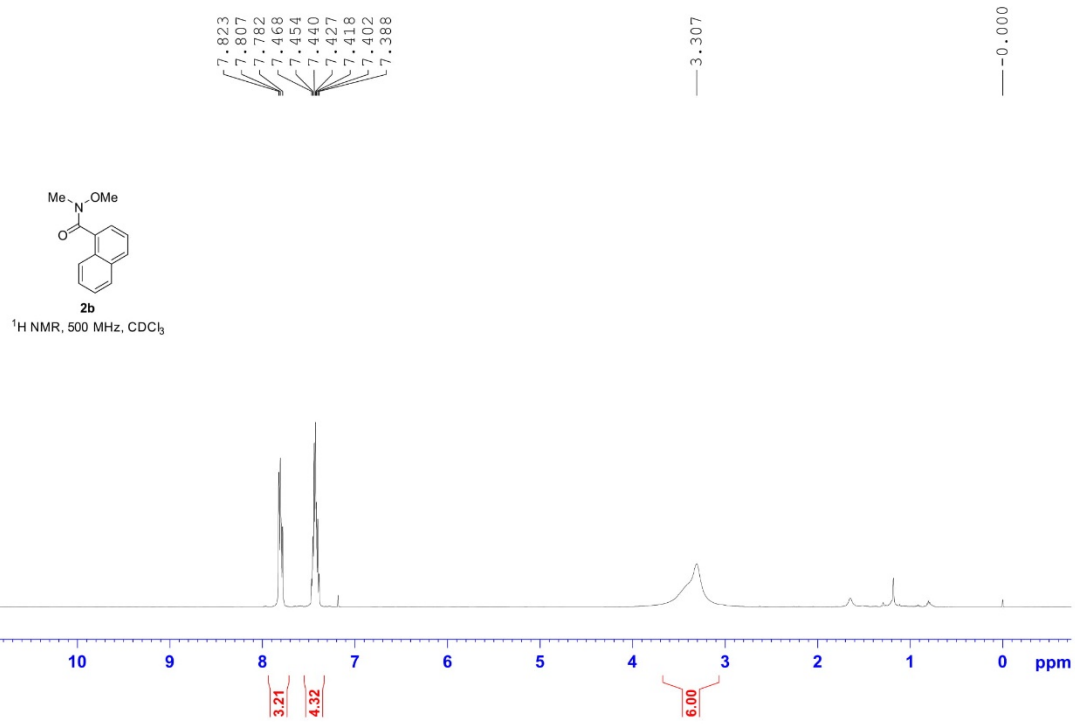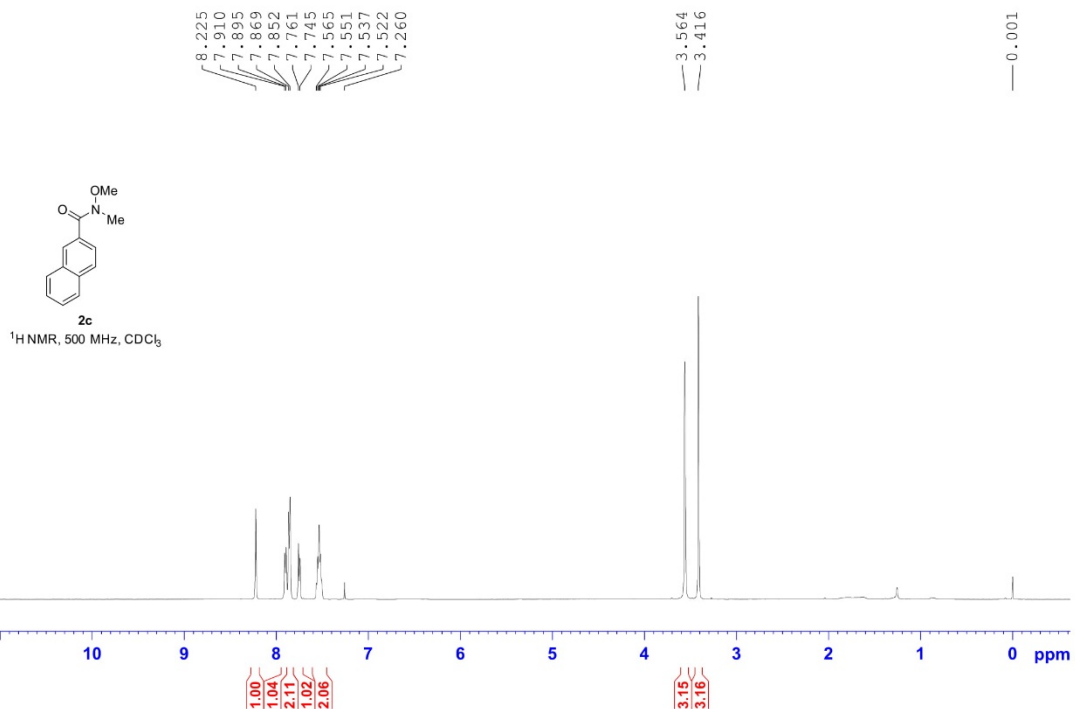

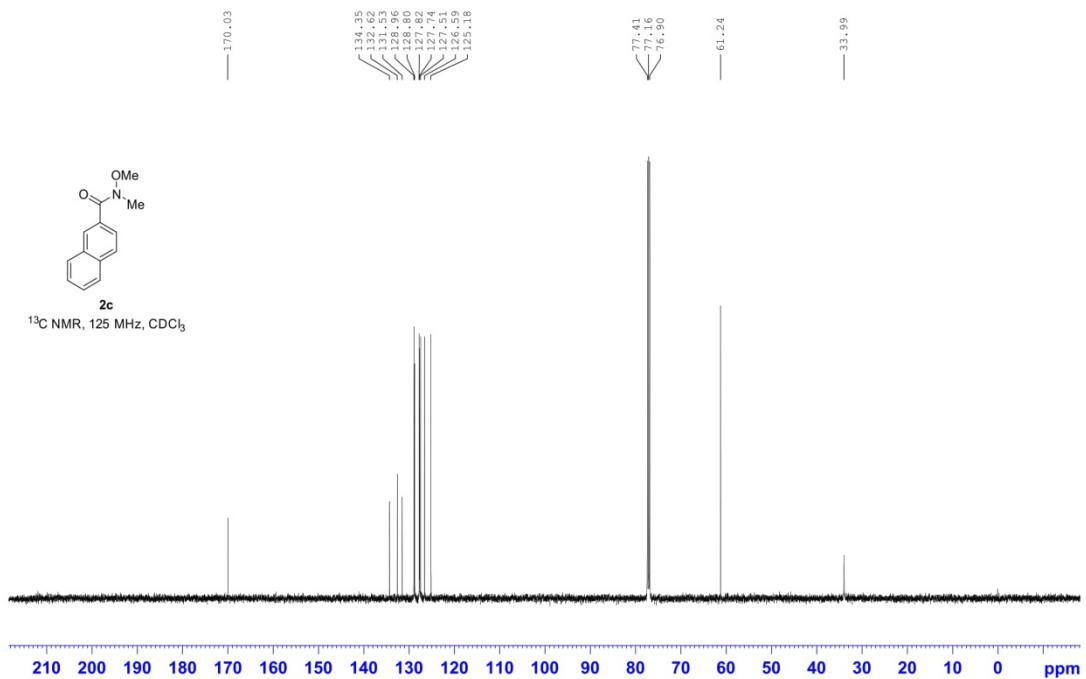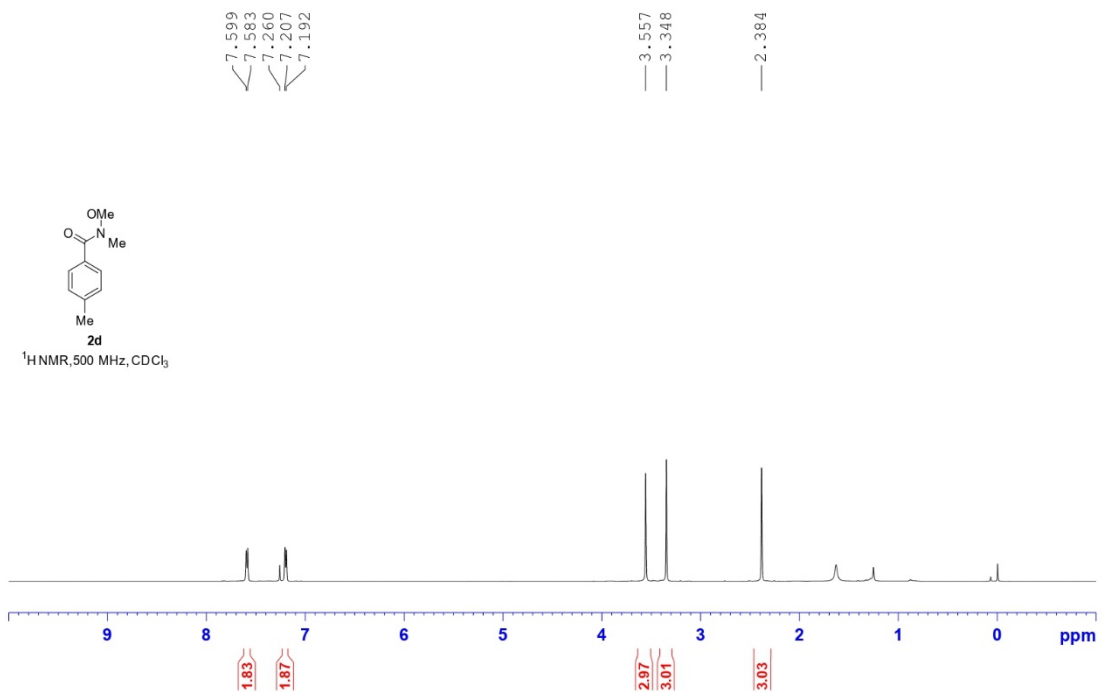

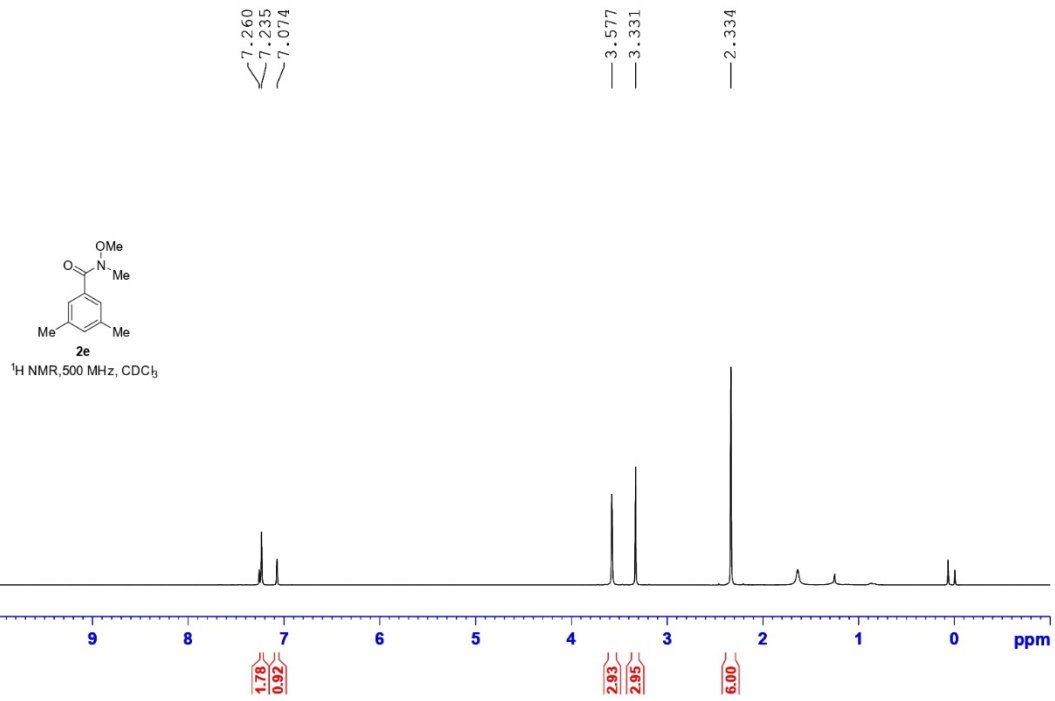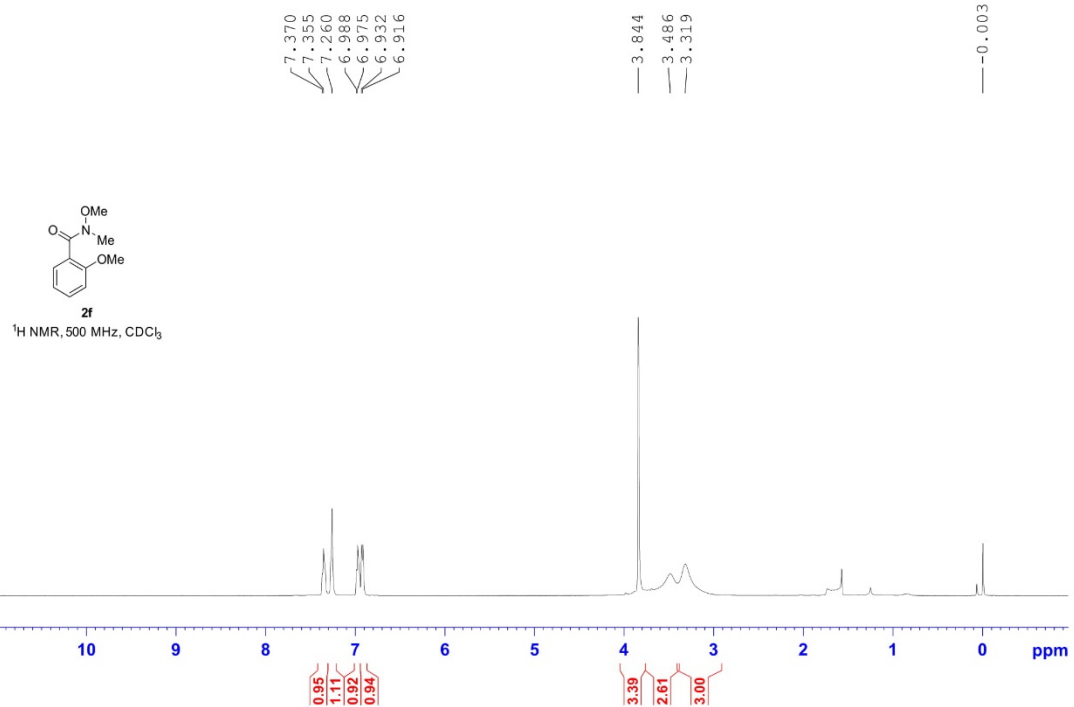

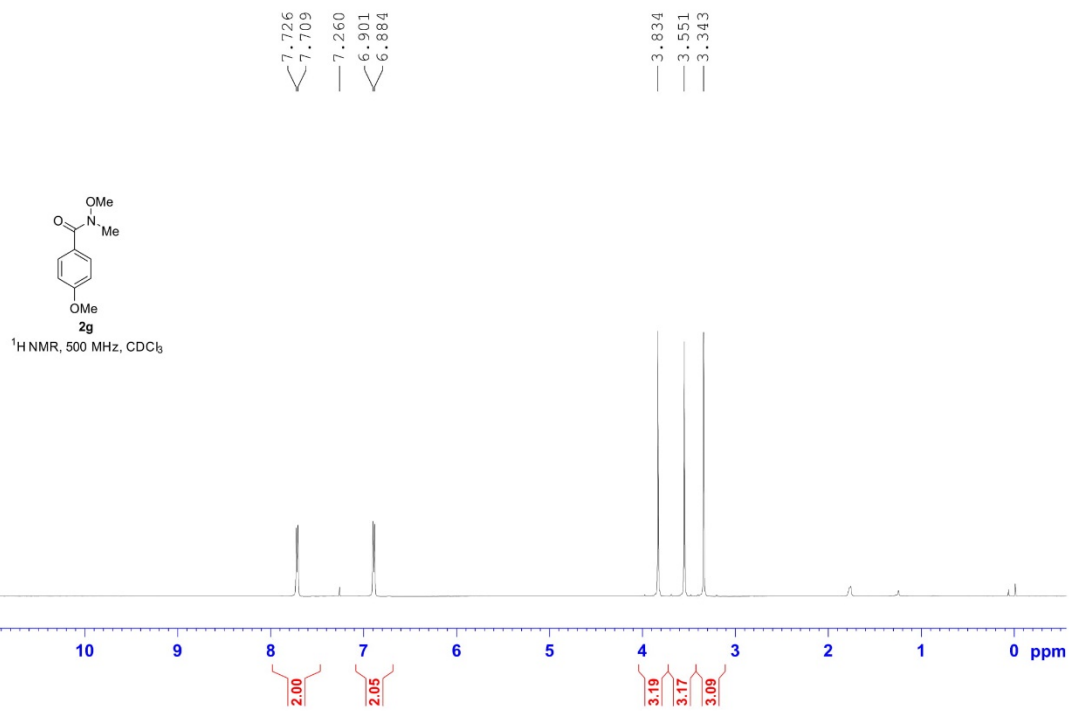

AK-DVK-131  
C13CPD CDC13 {C:\Bruker\TopSpin3.2} nmr 55

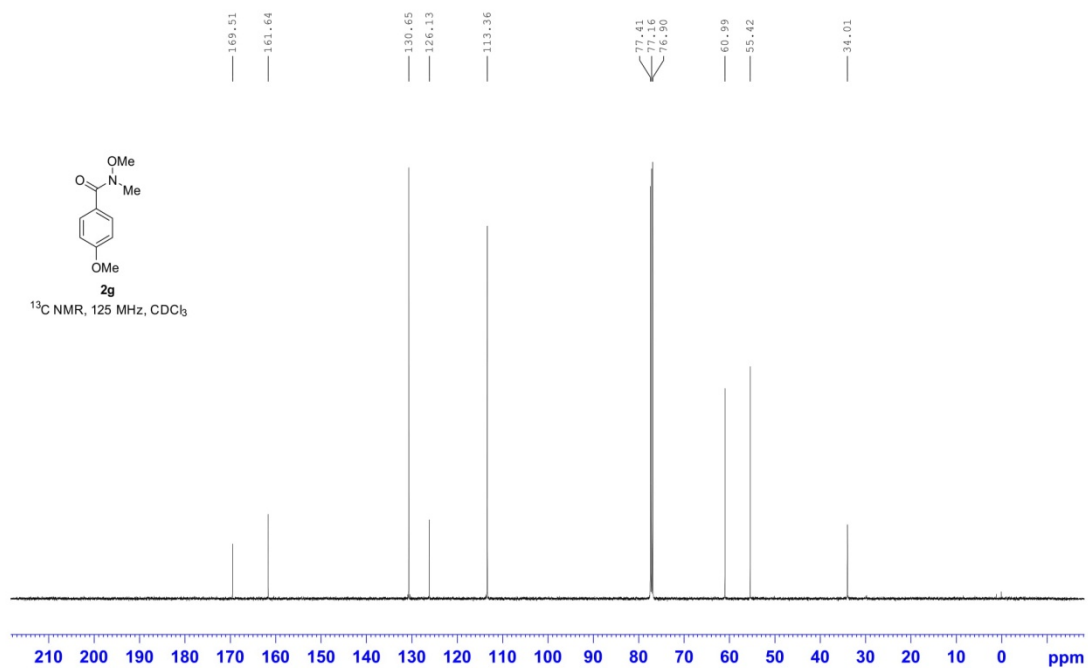



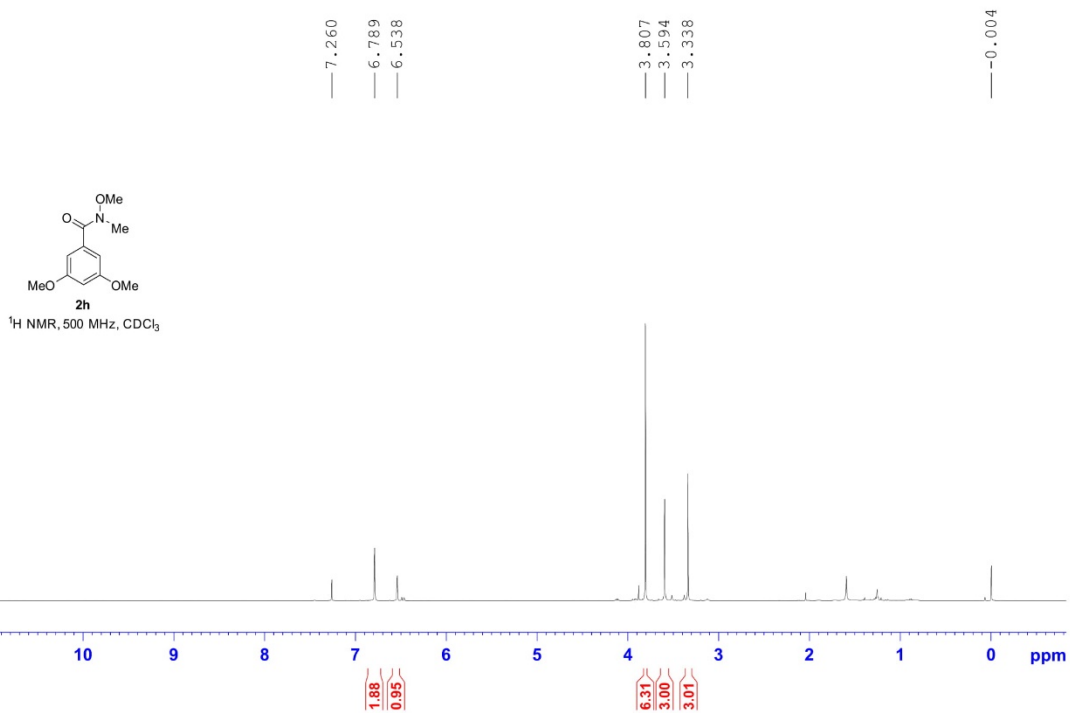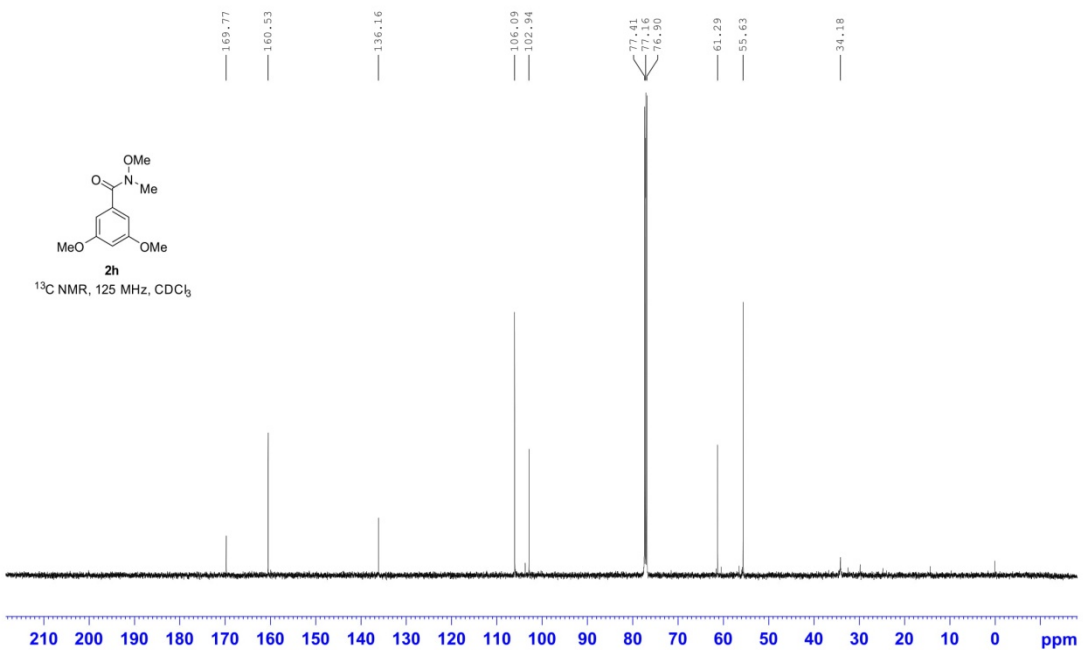

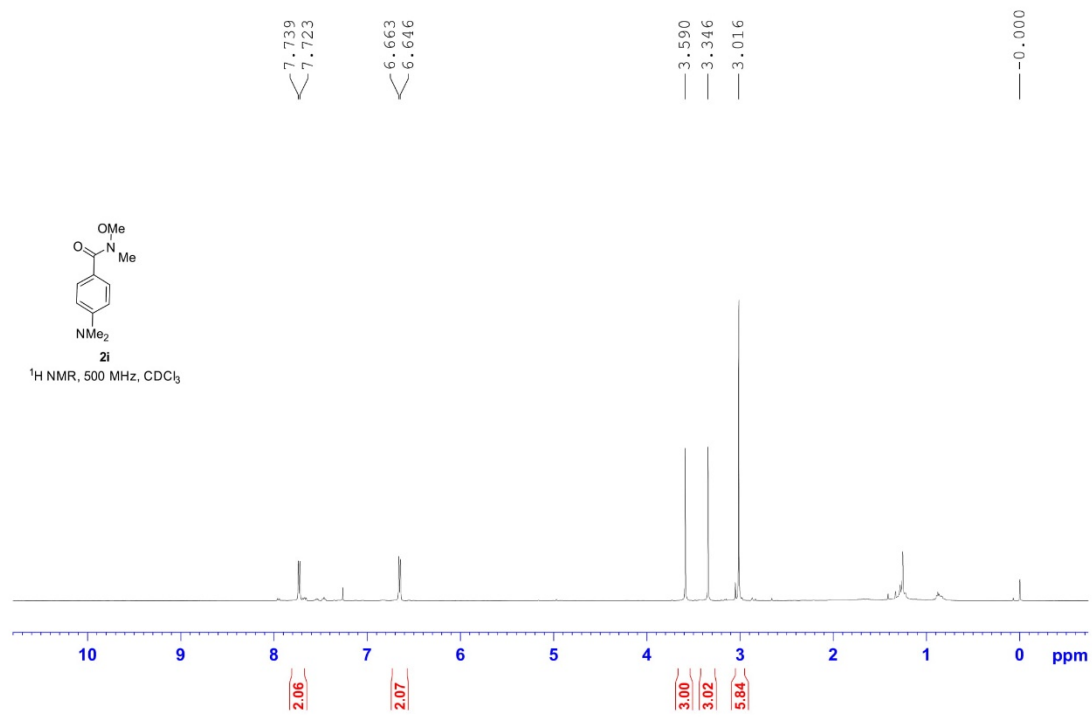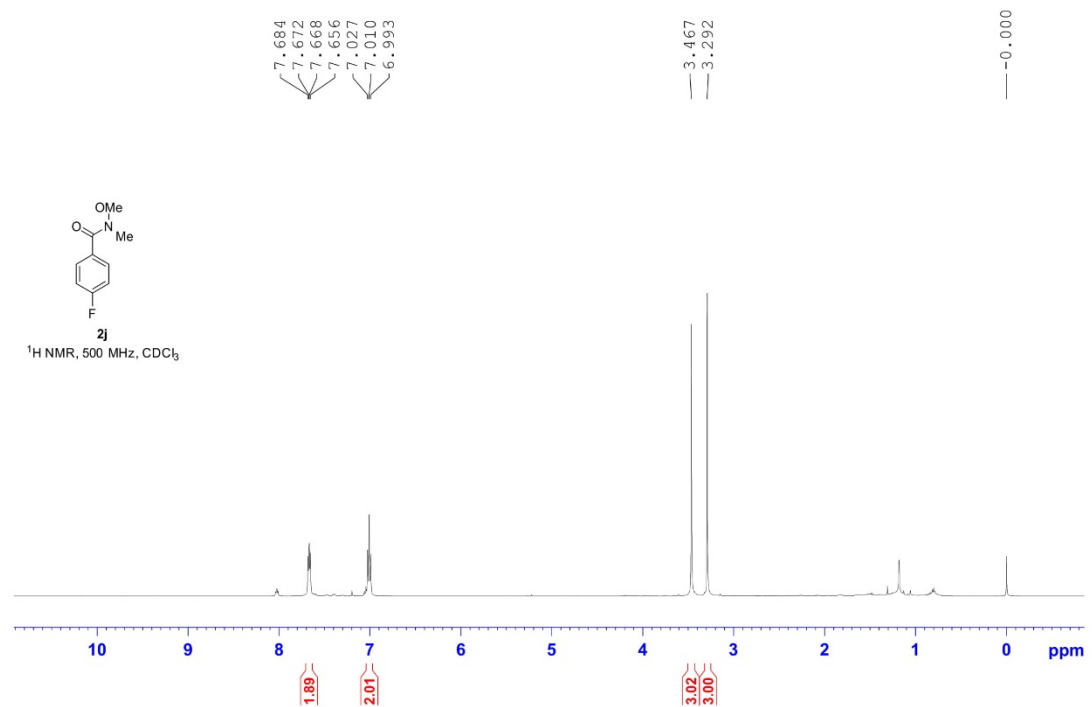

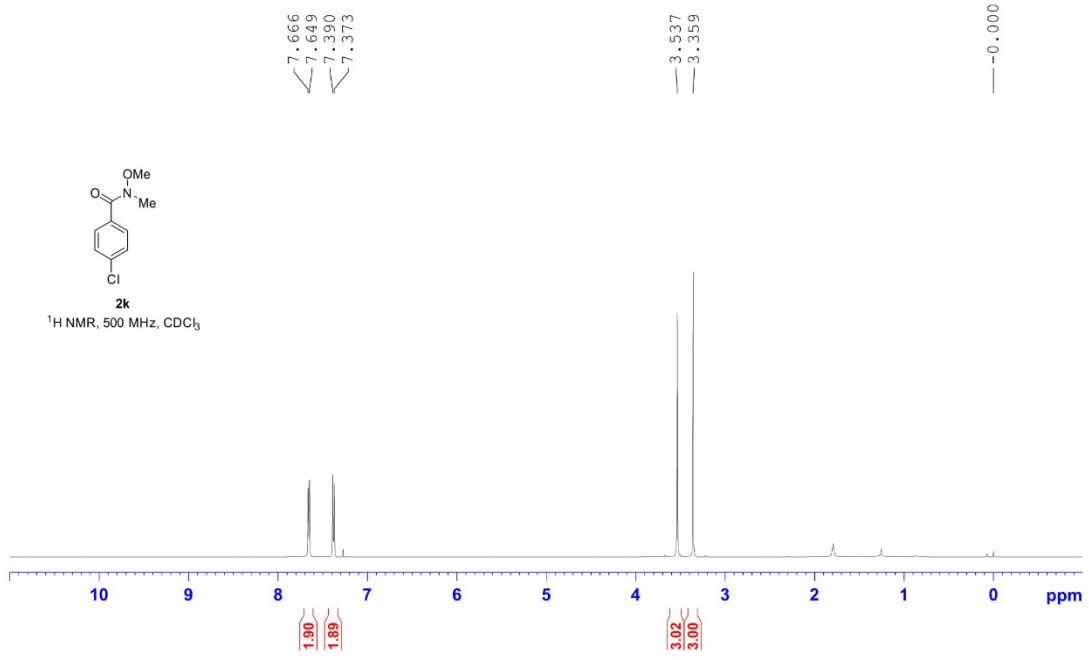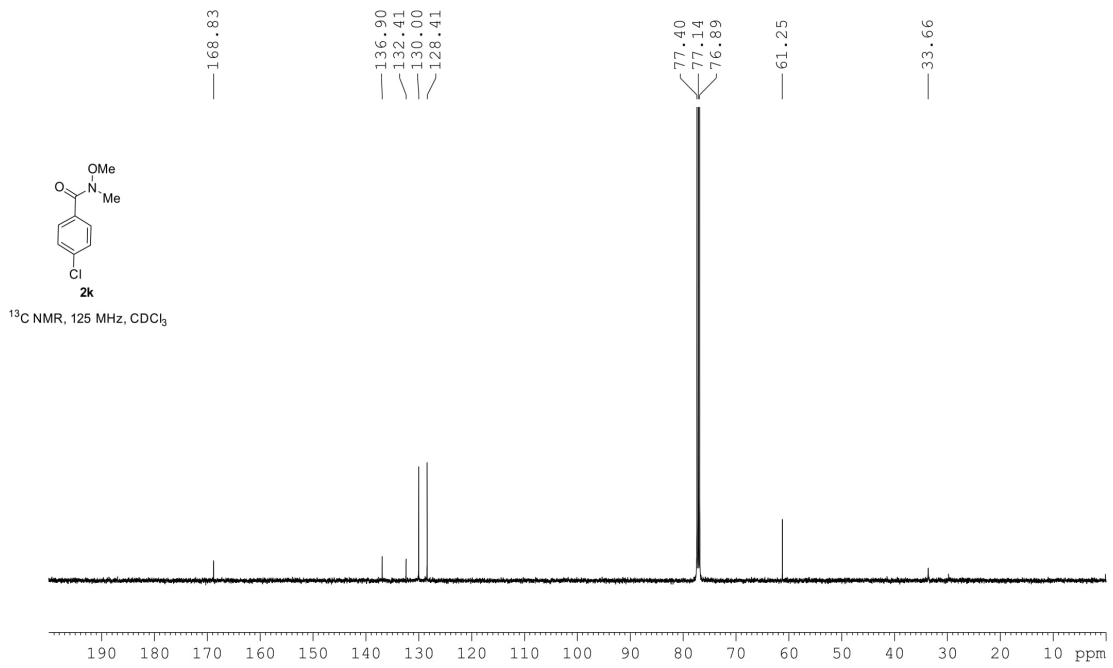

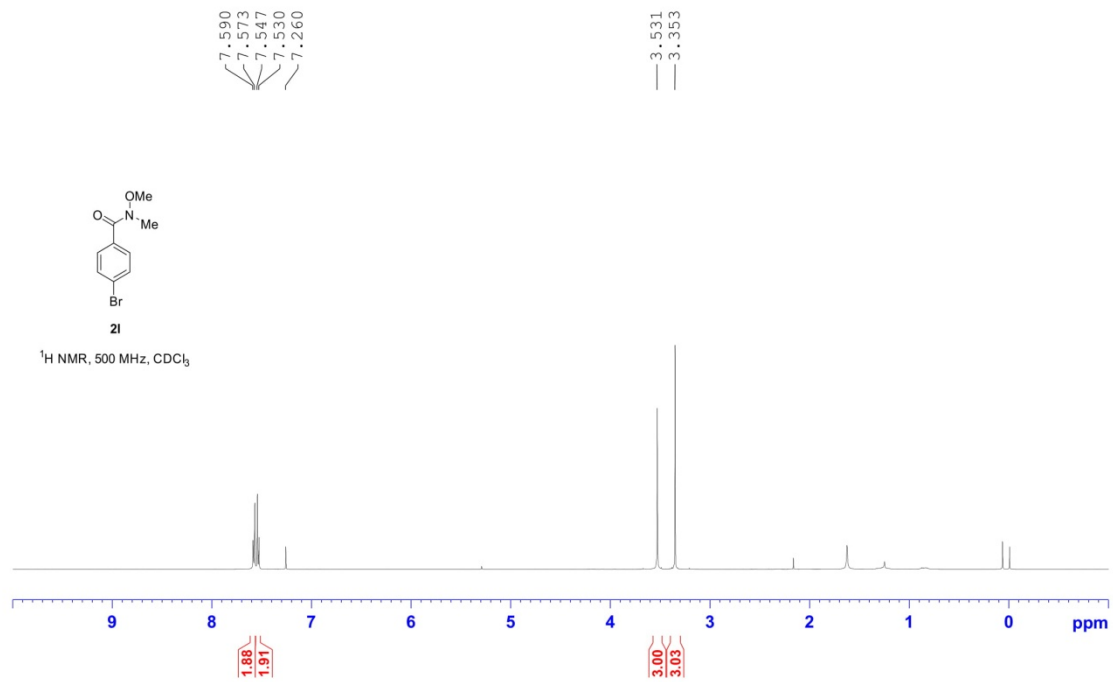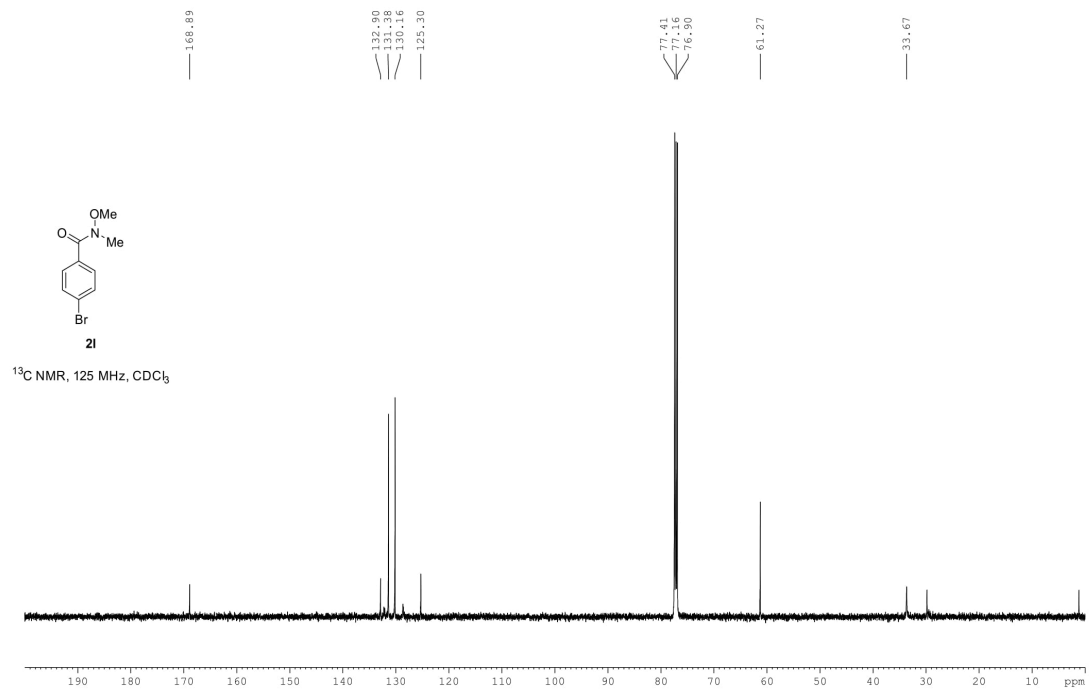

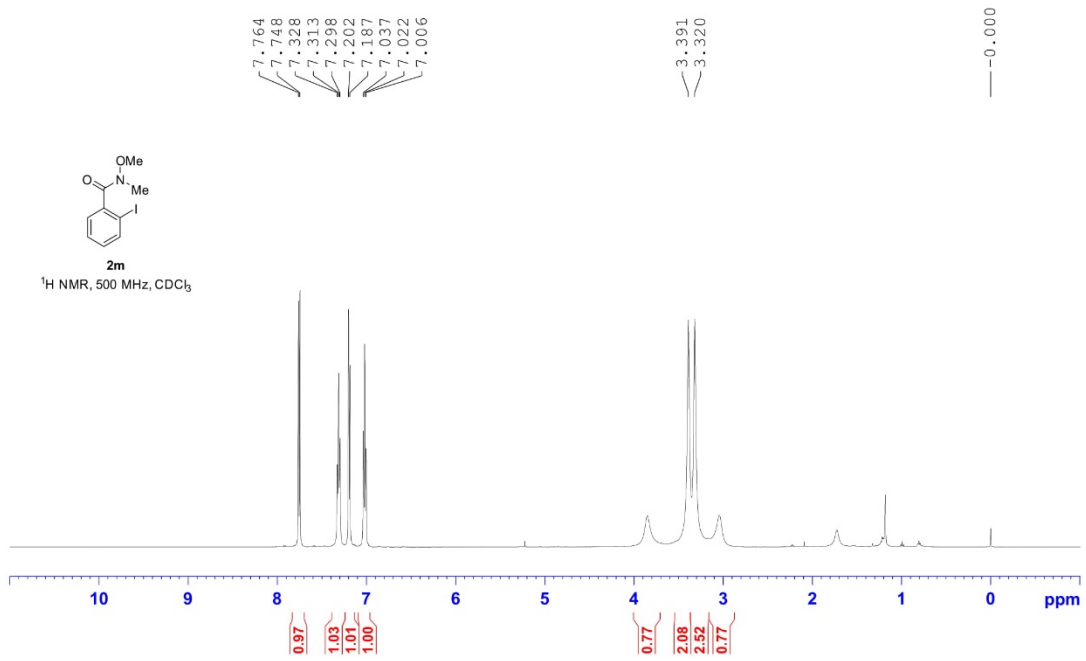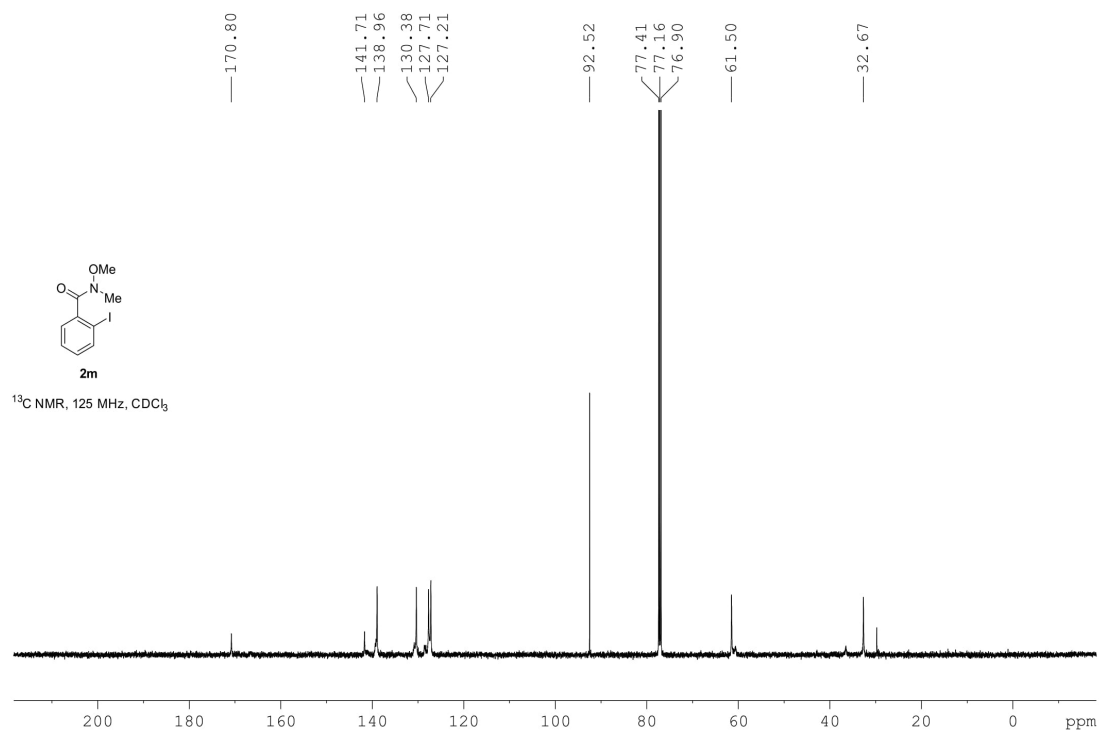

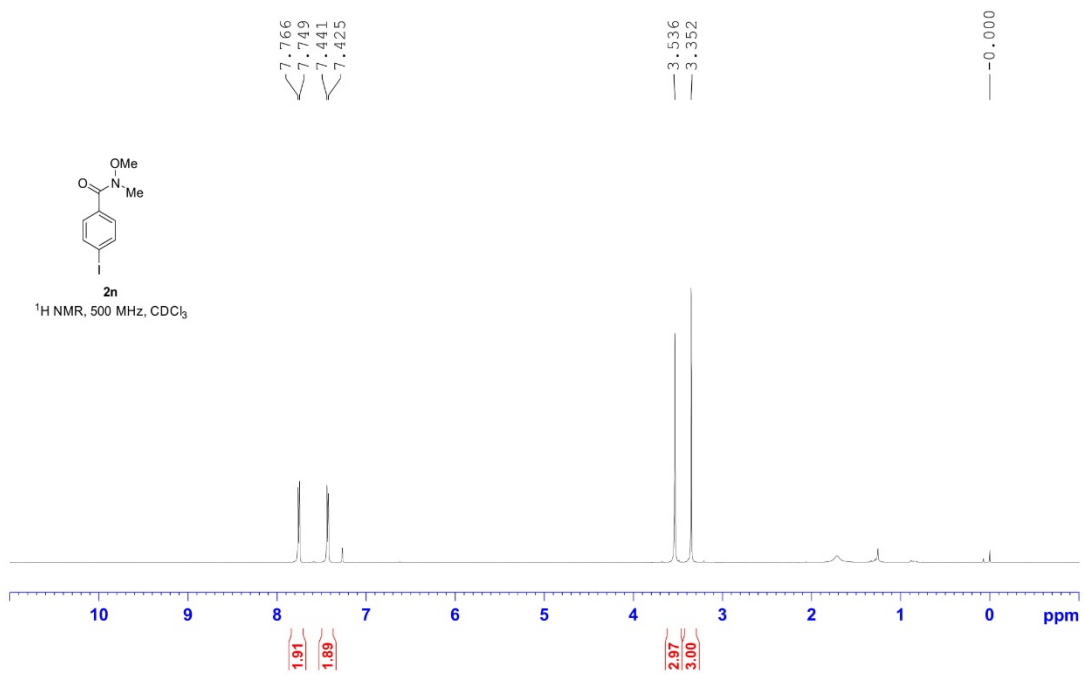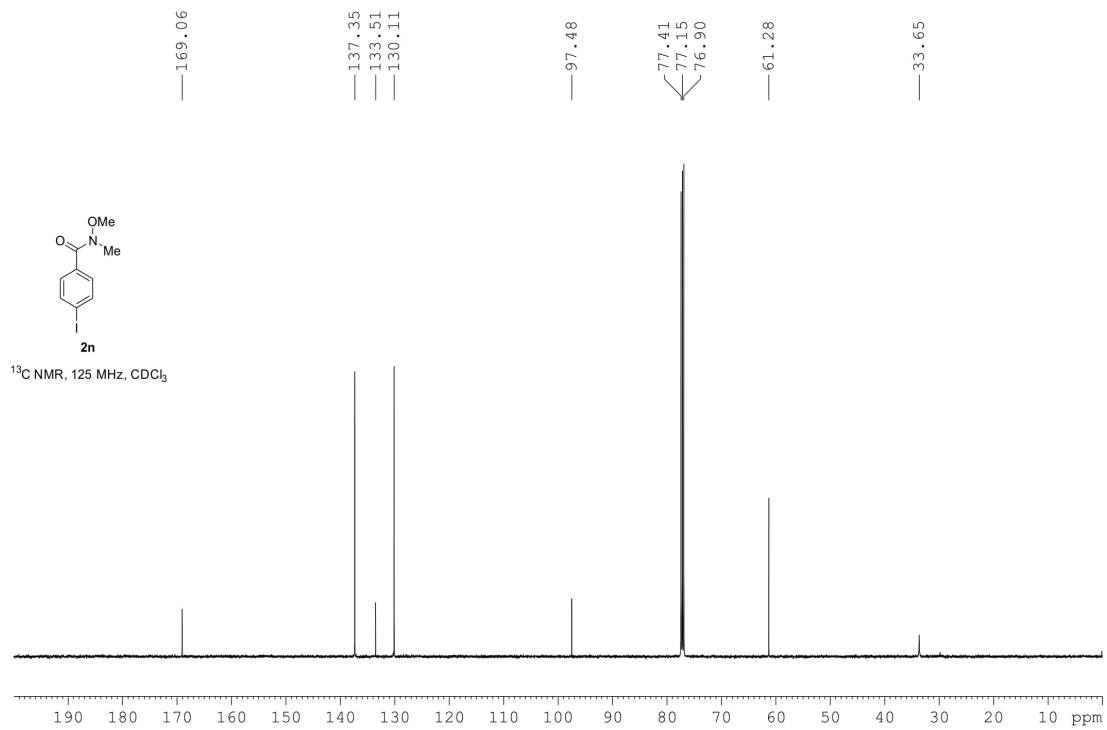

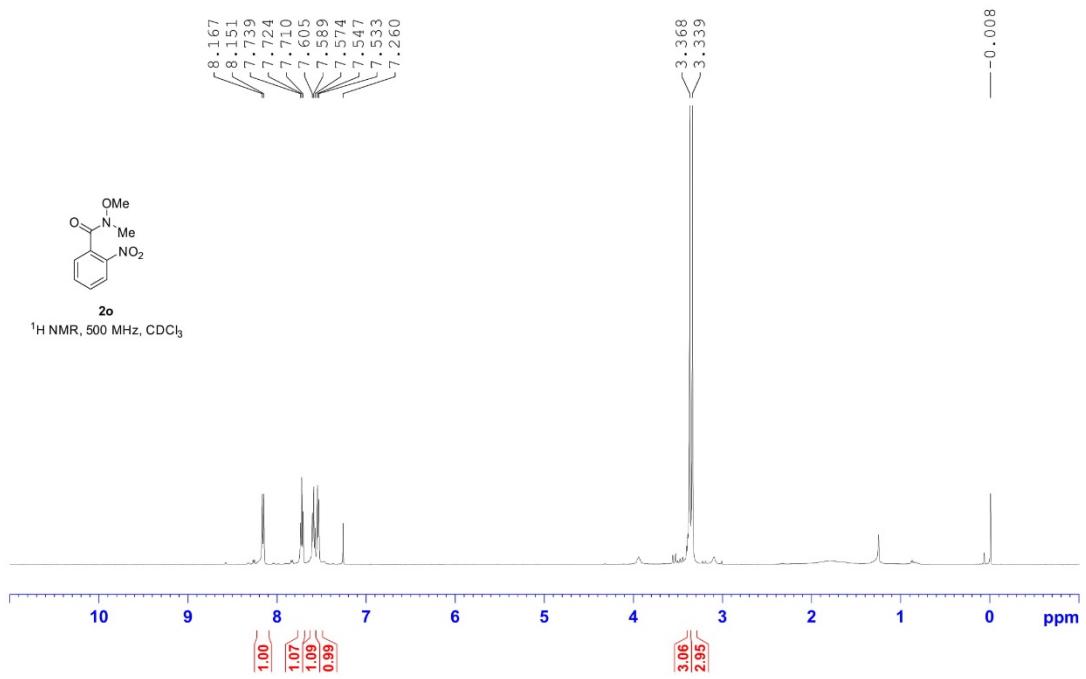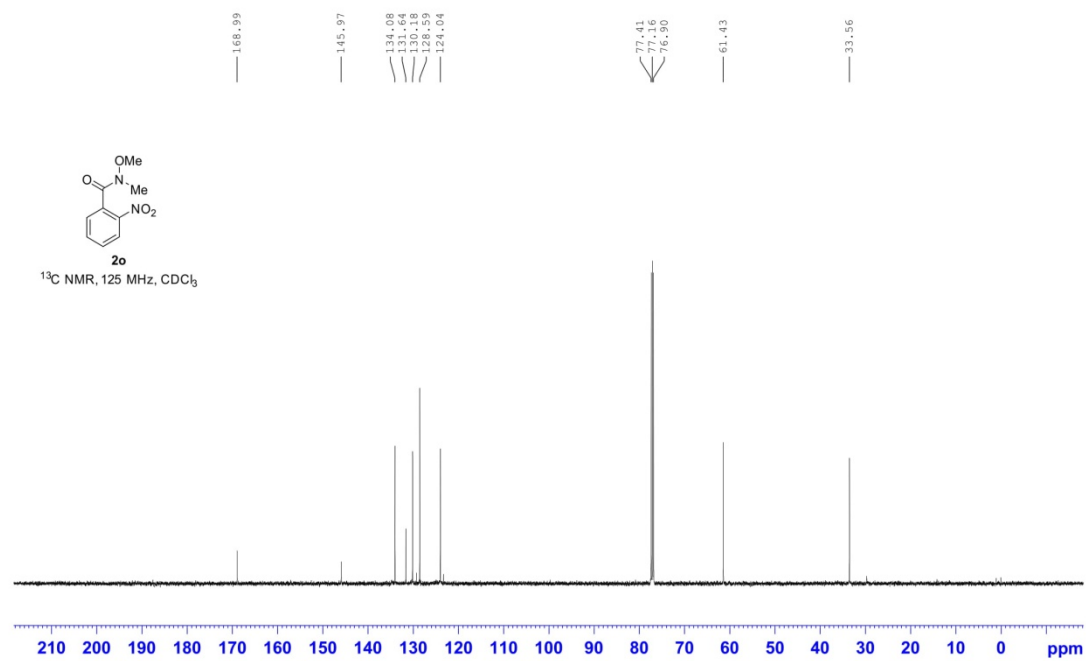

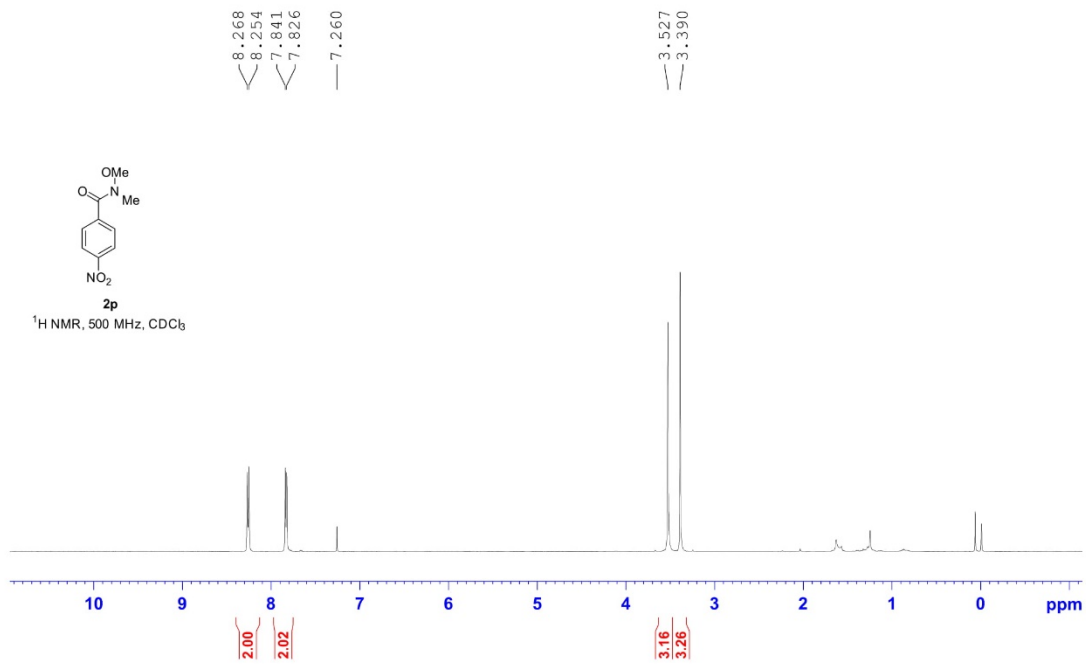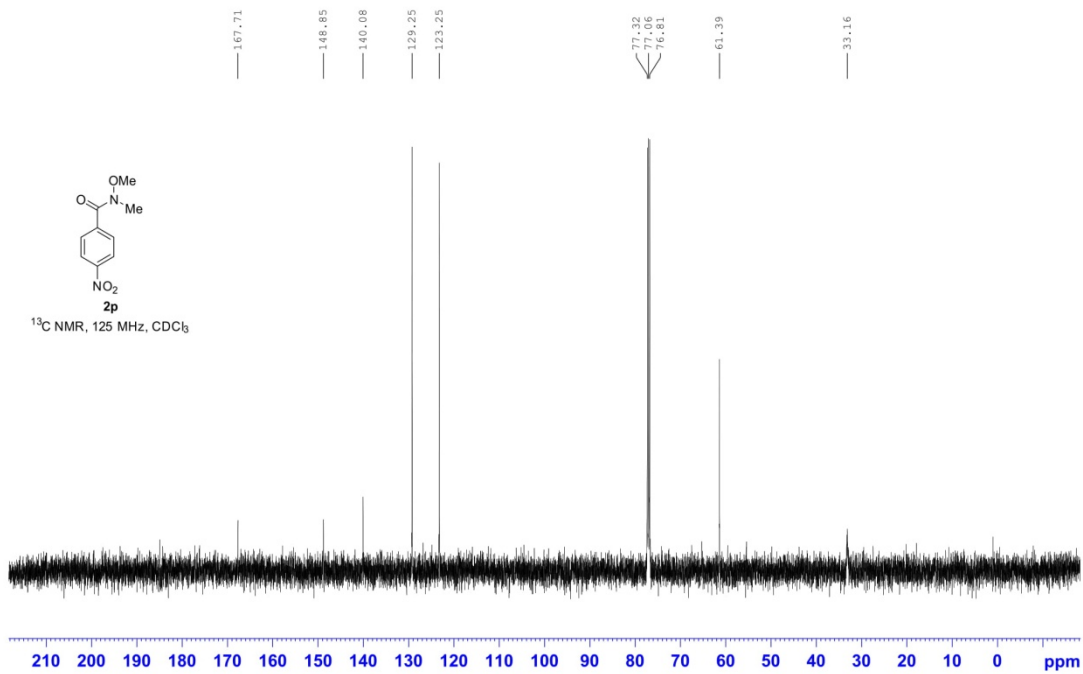



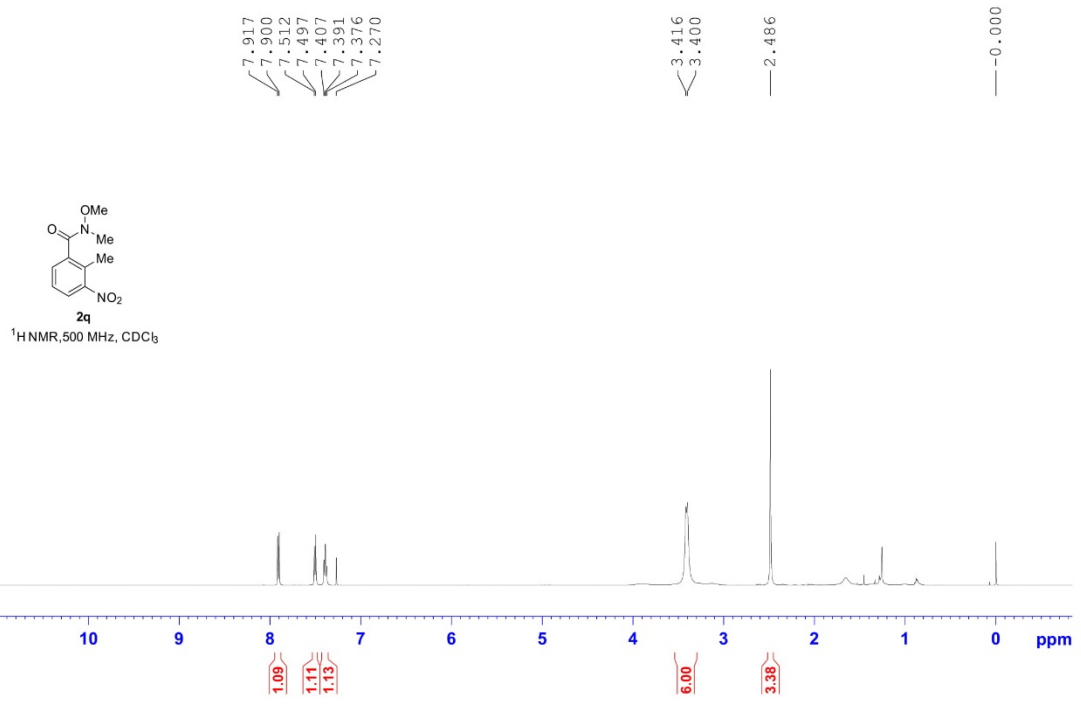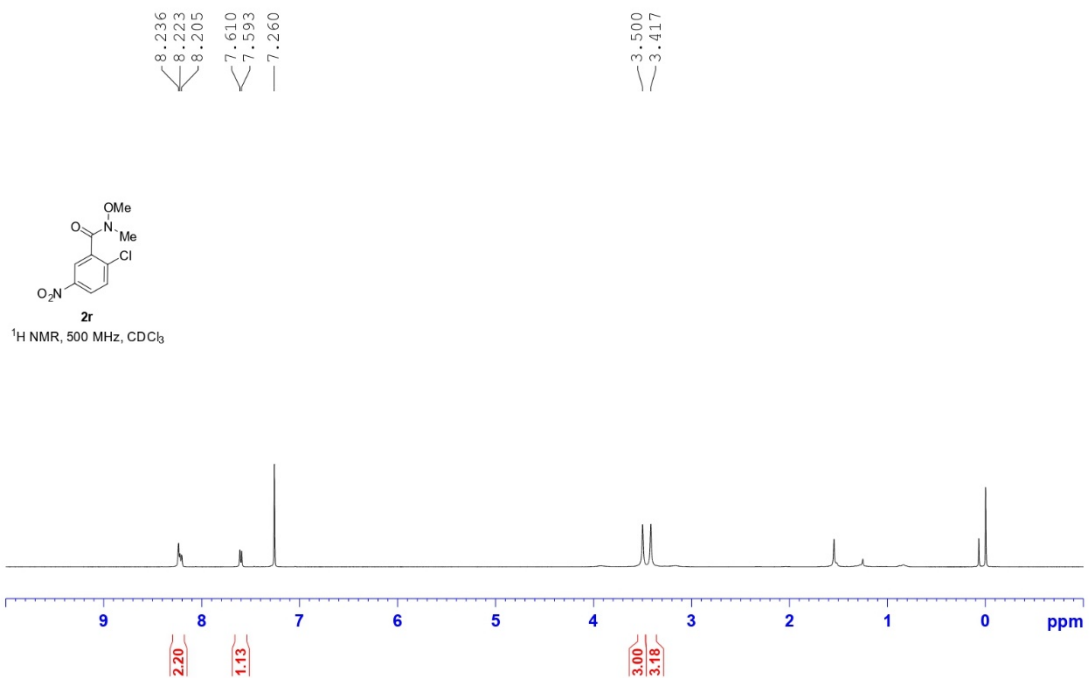

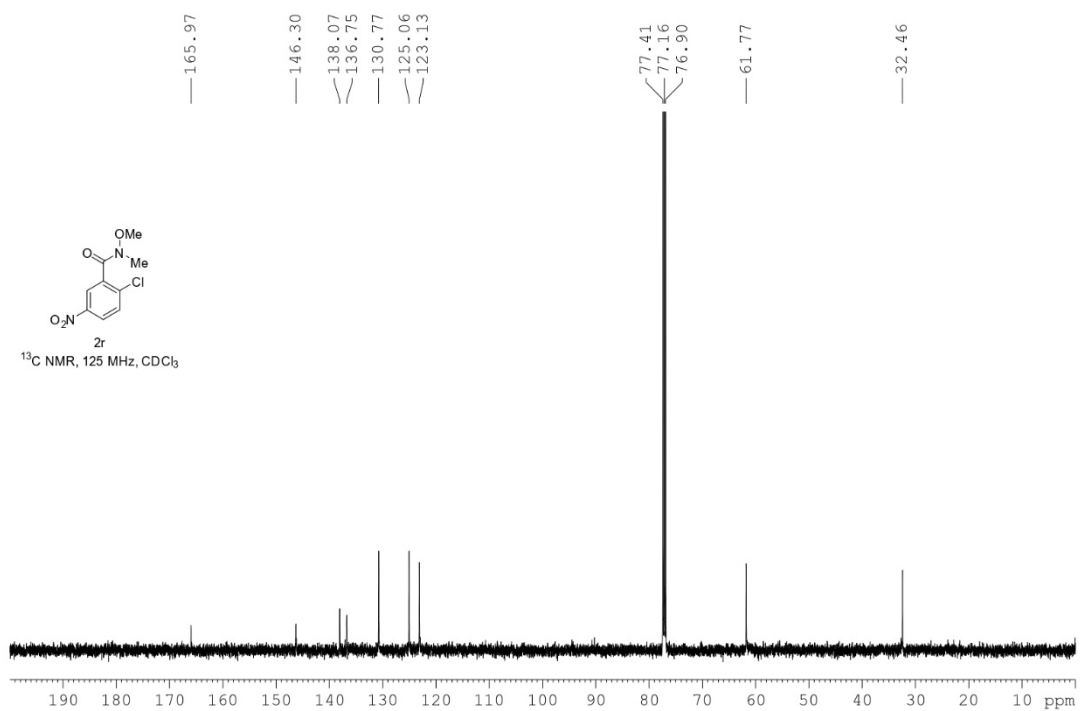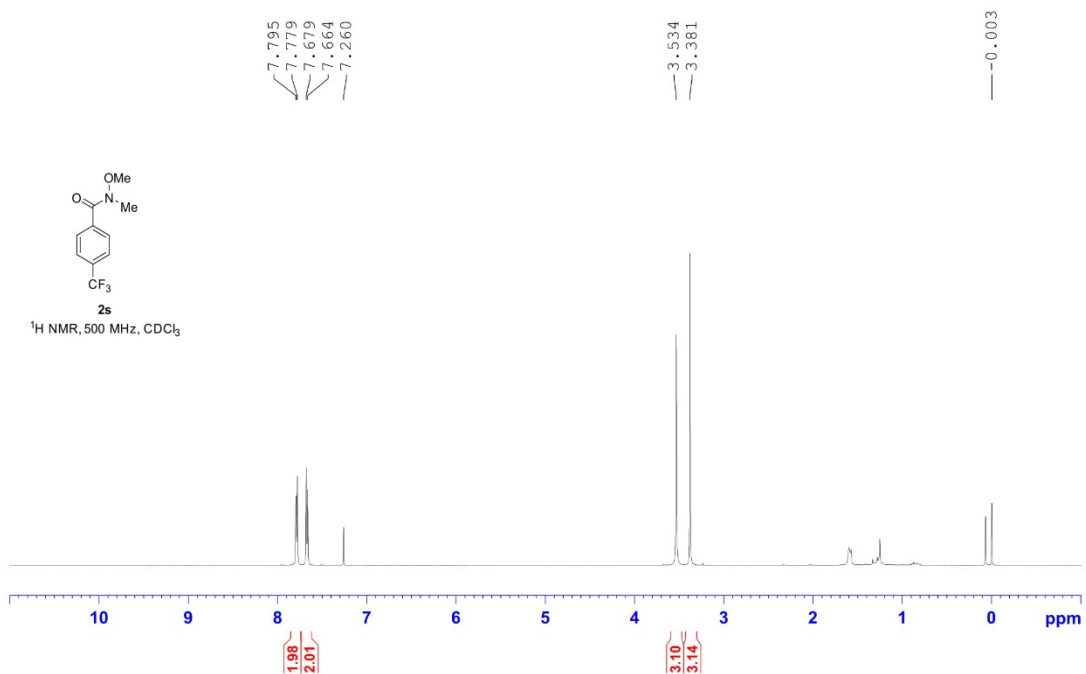

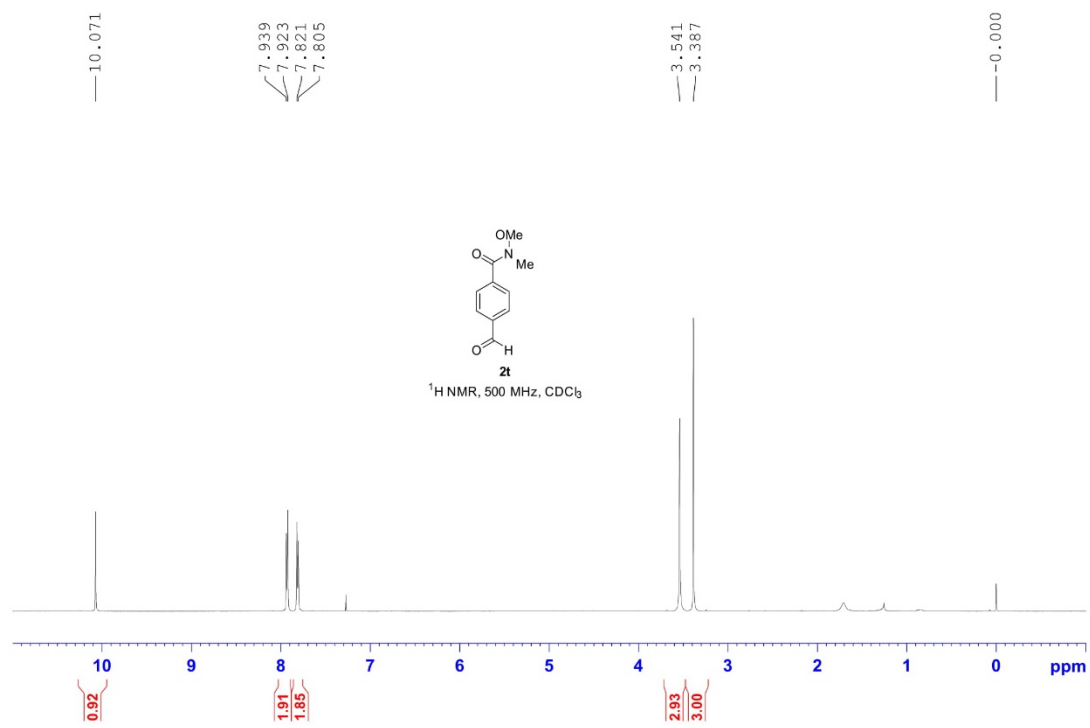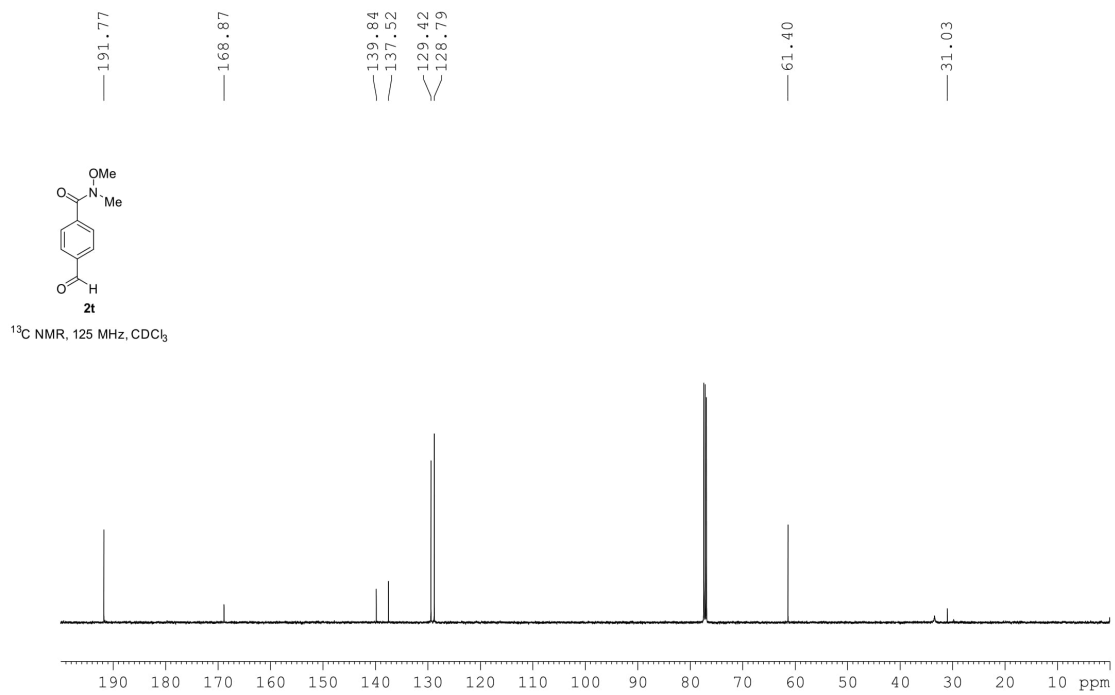

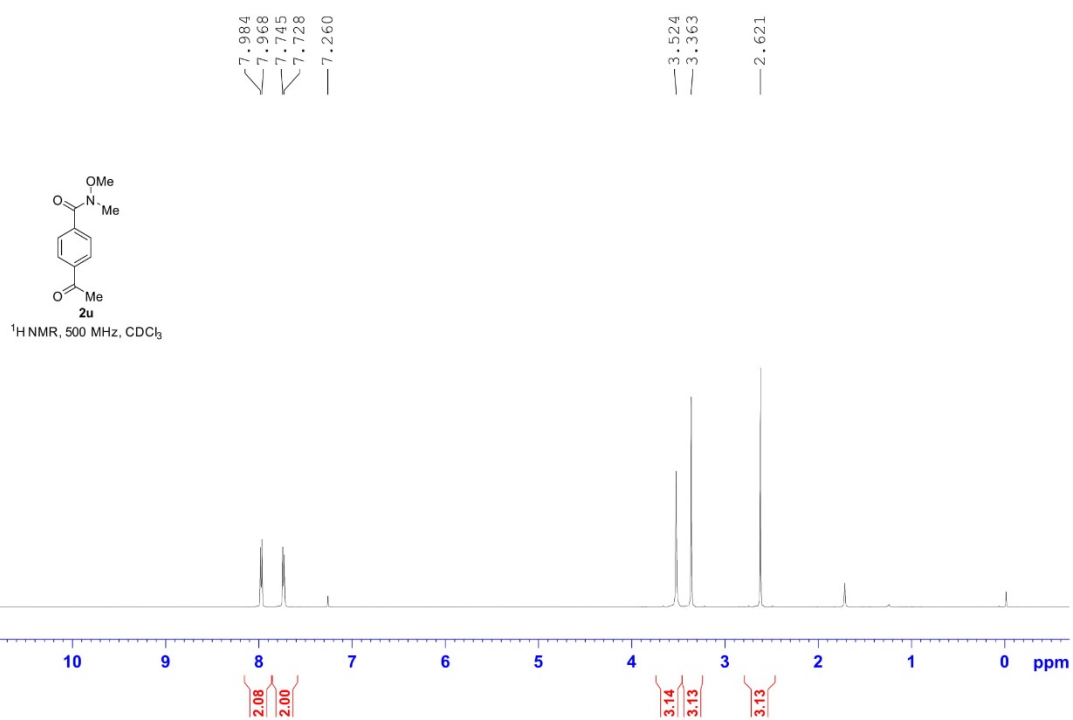

AK-DVK-137  
 C13CPD  $\text{CDCl}_3$  {C:\Bruker\TopSpin3.2} nmr 56

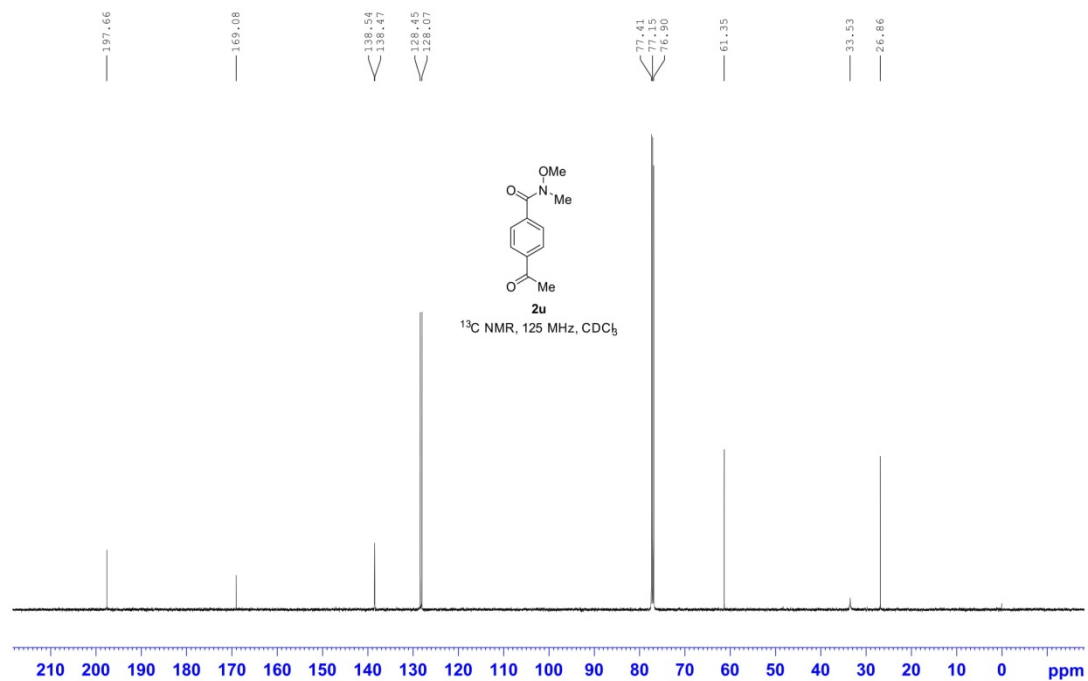

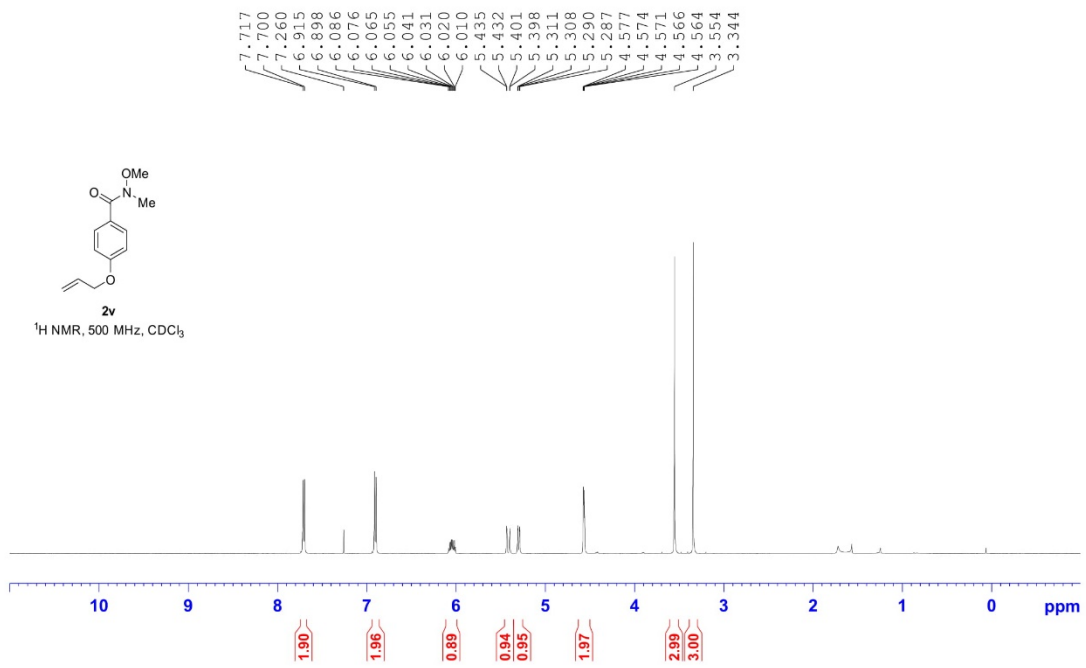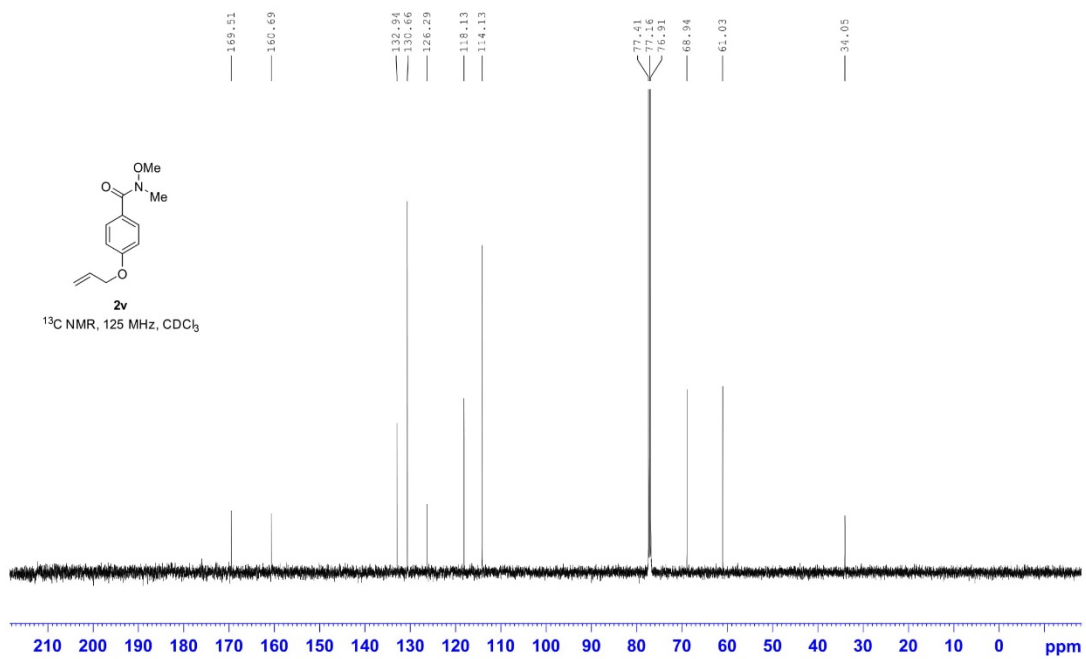

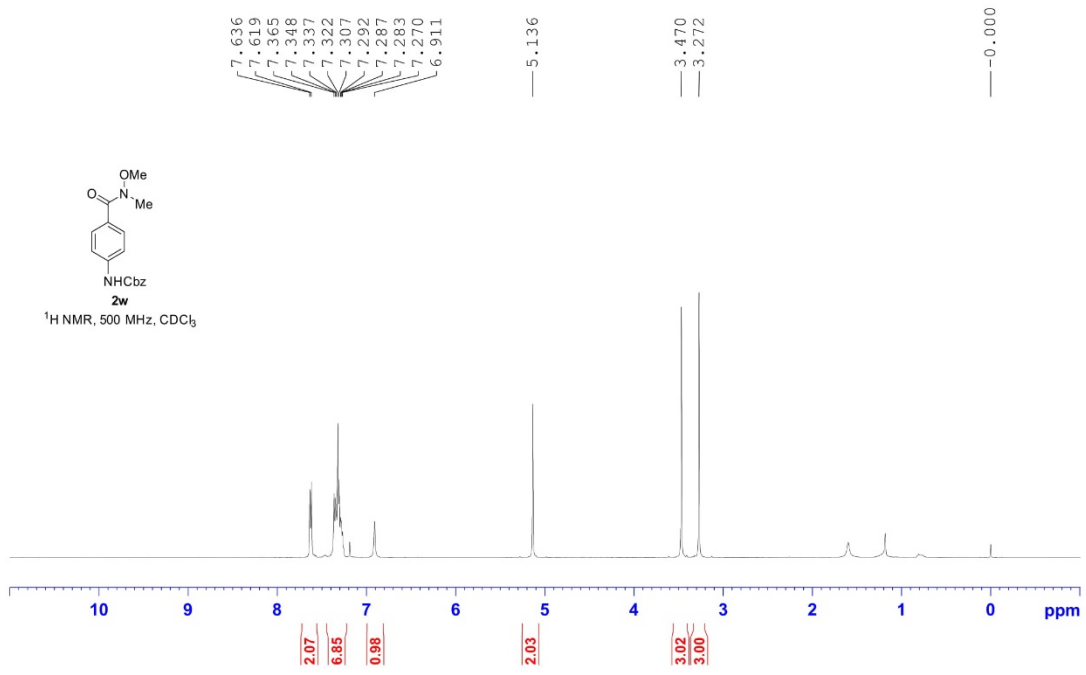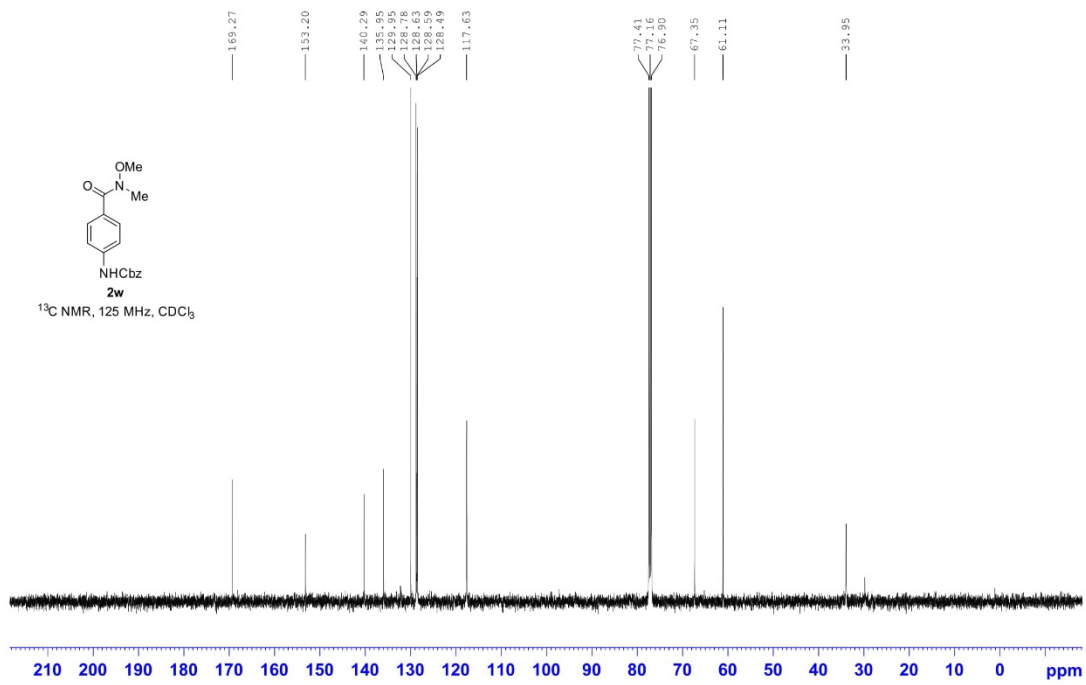

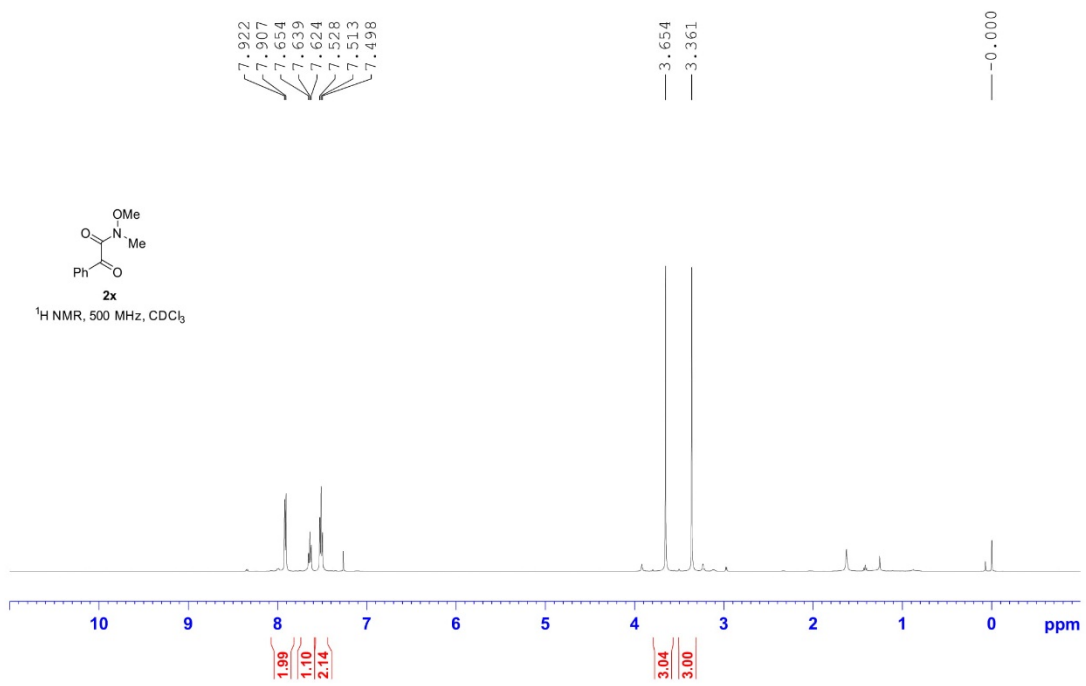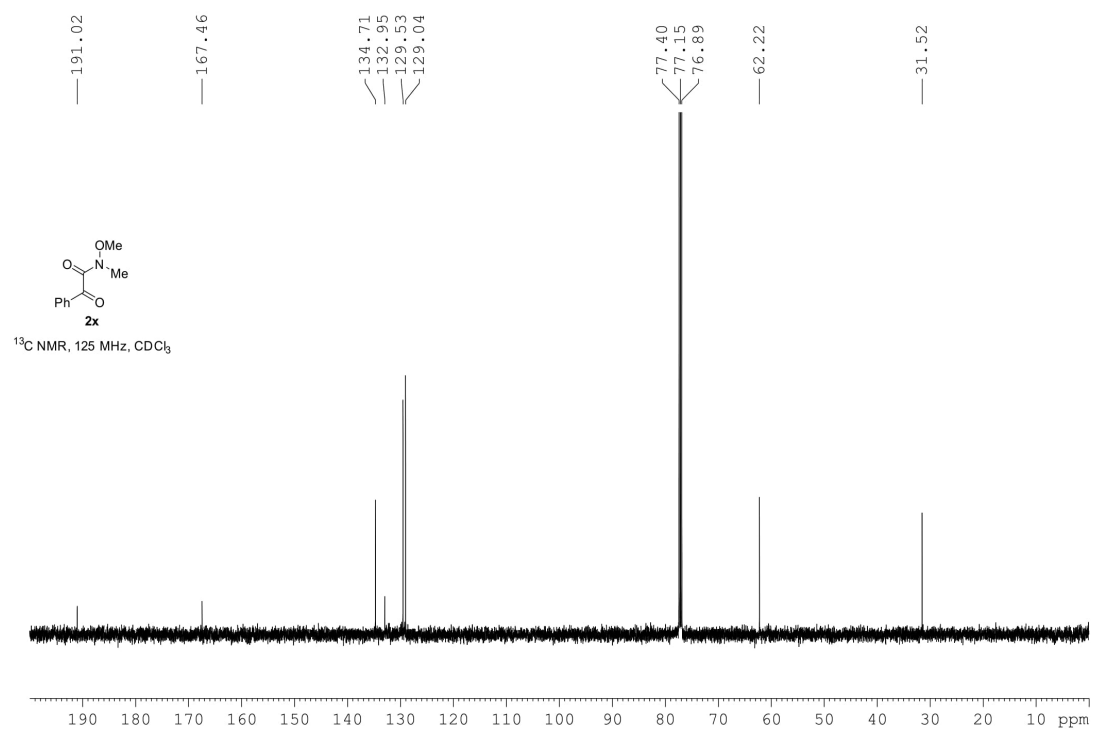

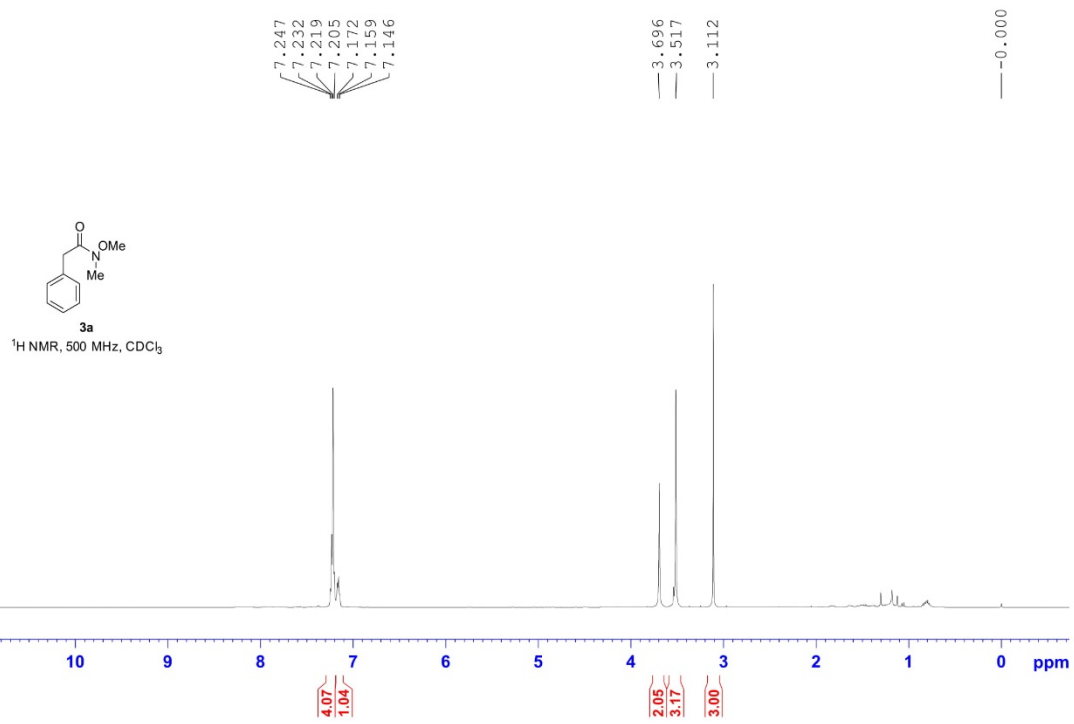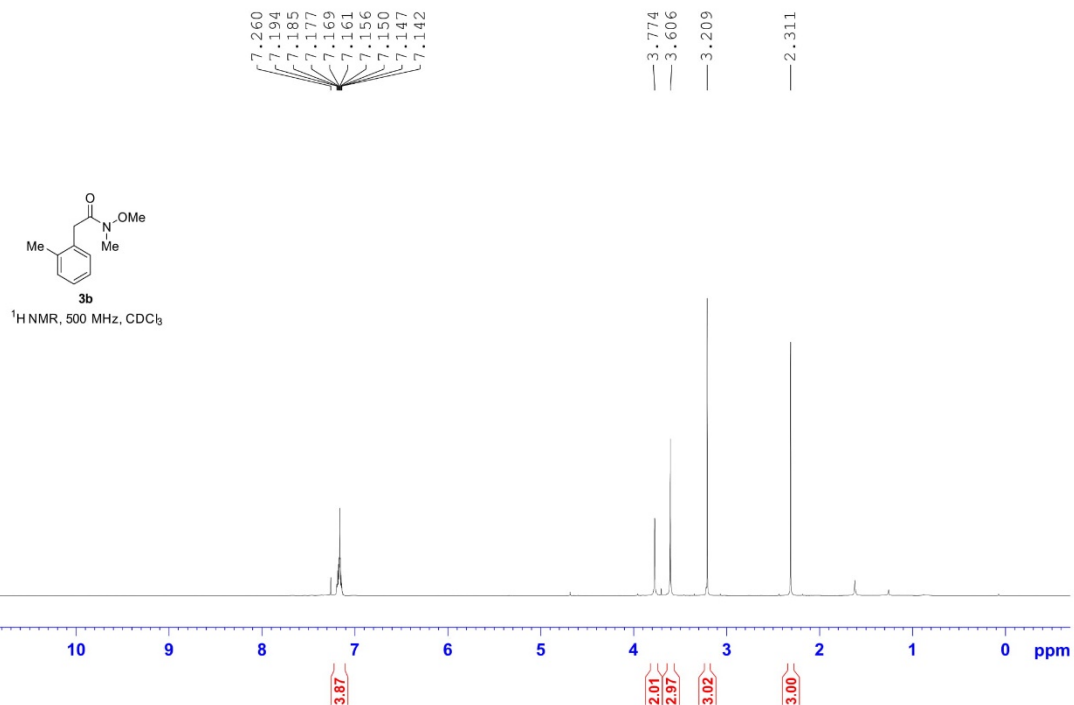



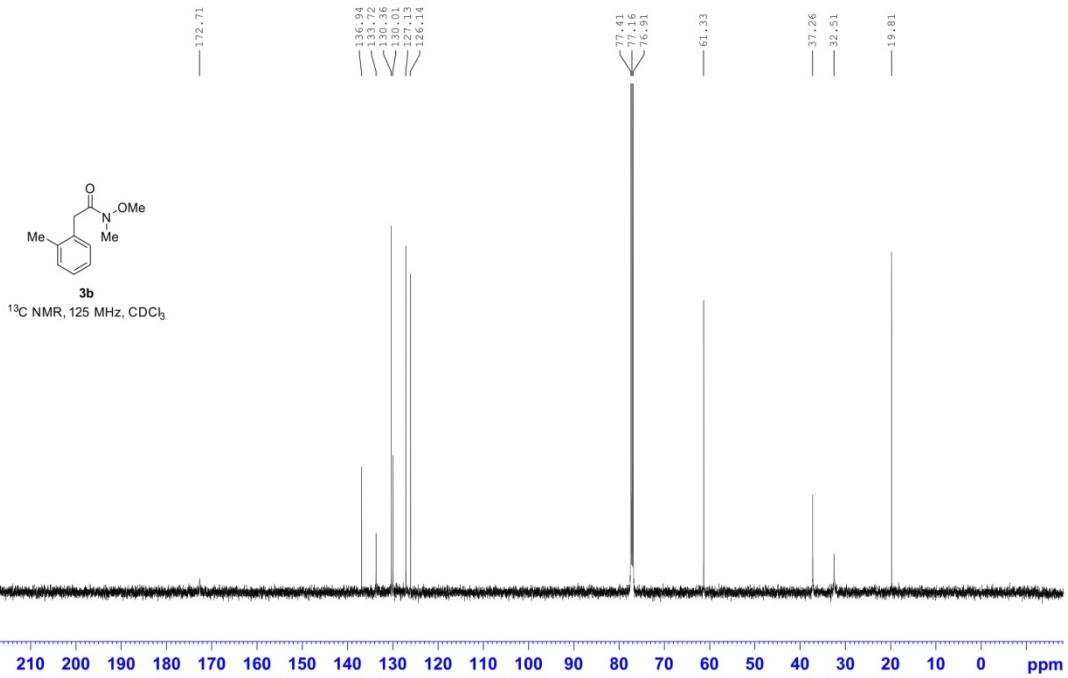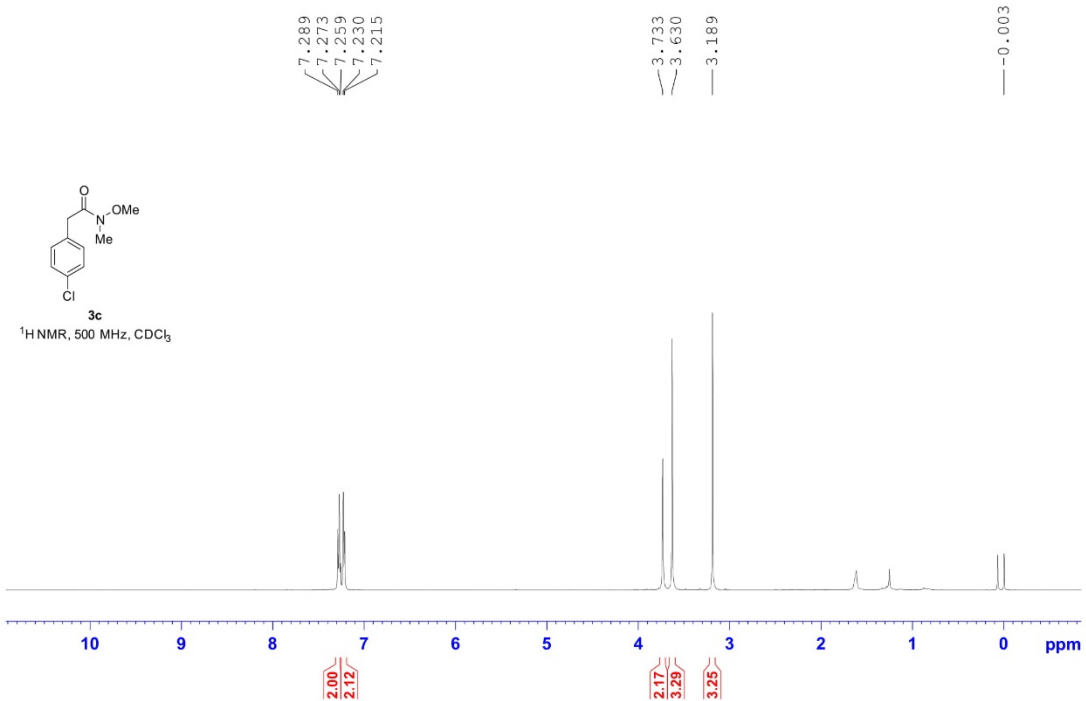

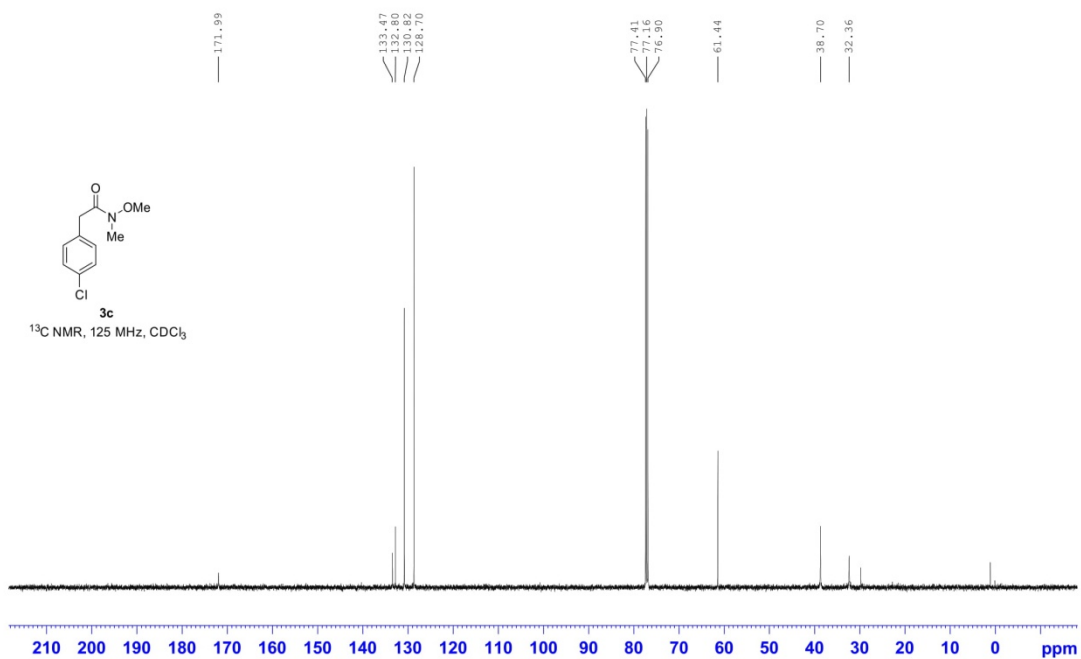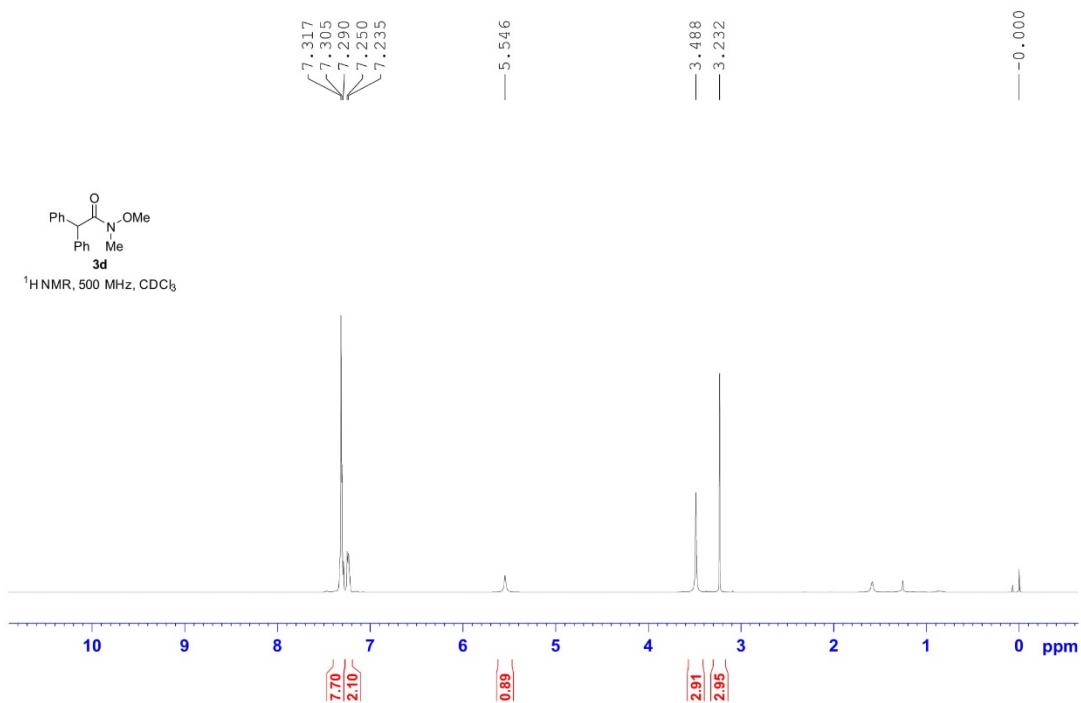

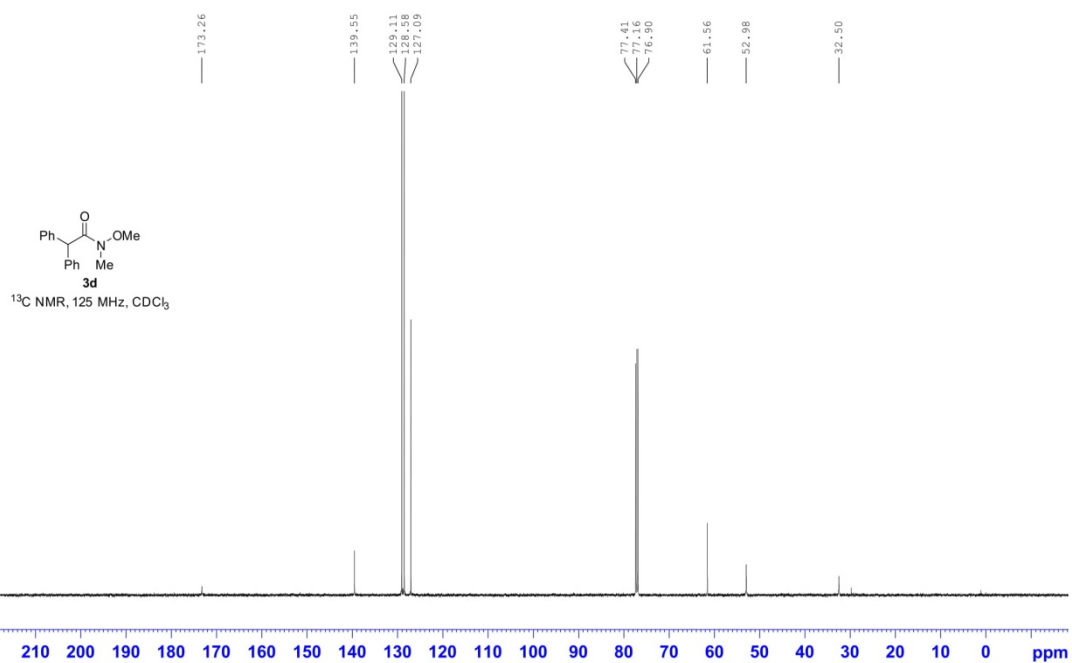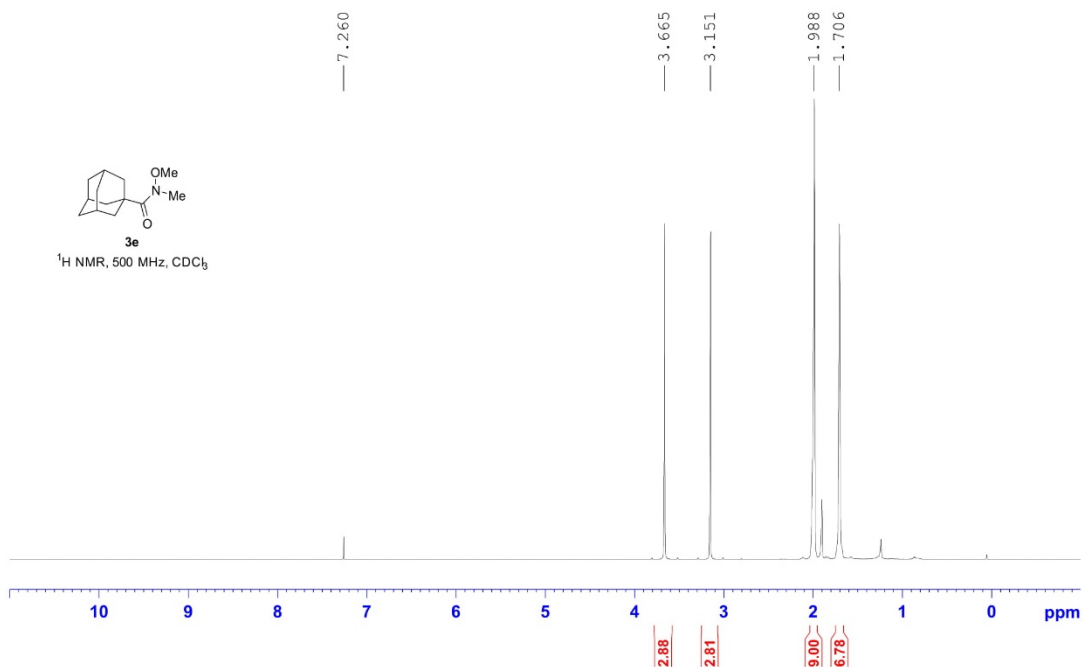

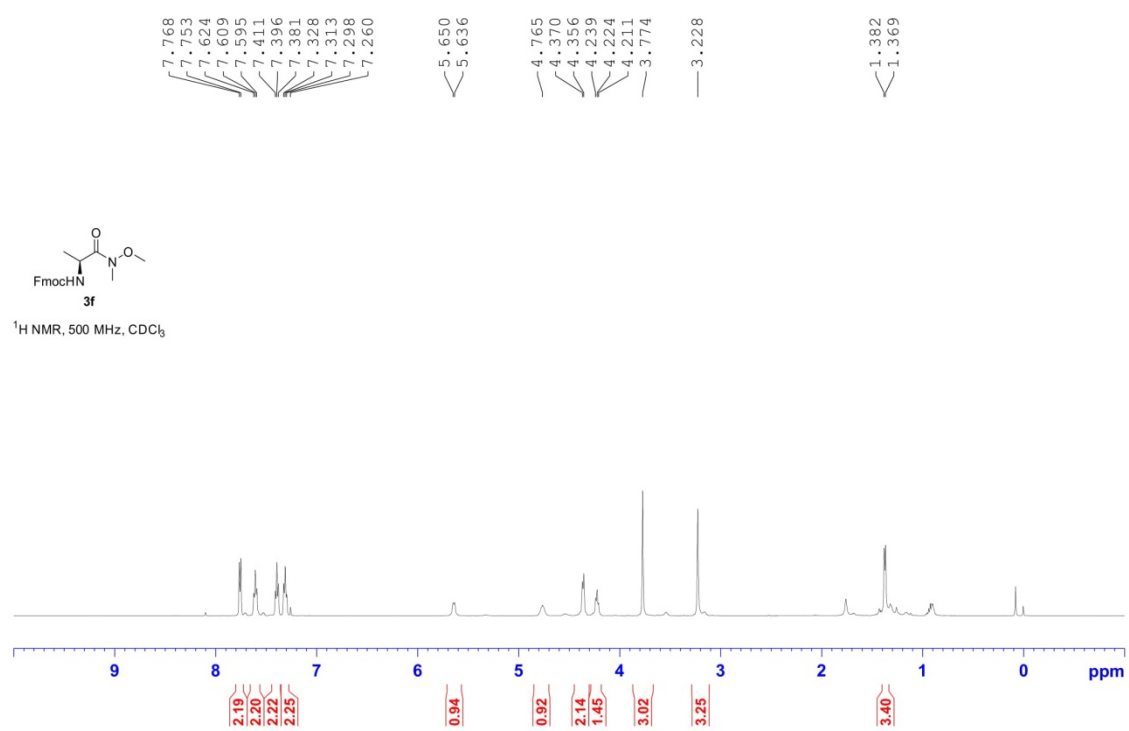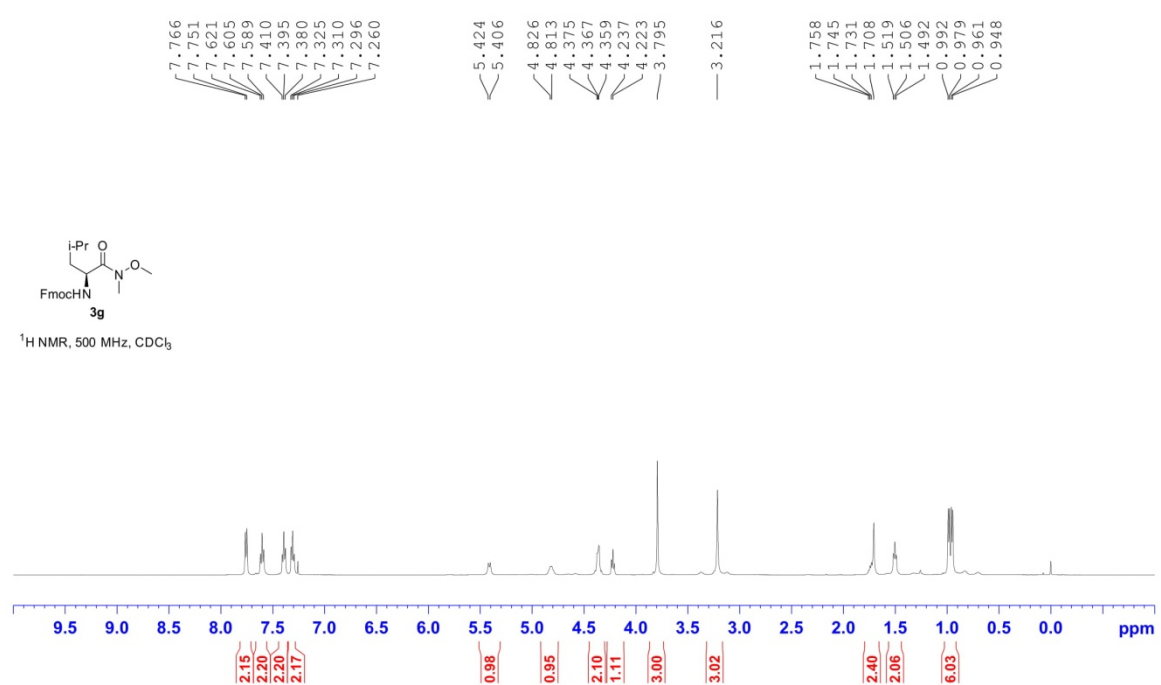

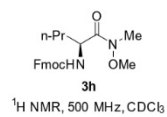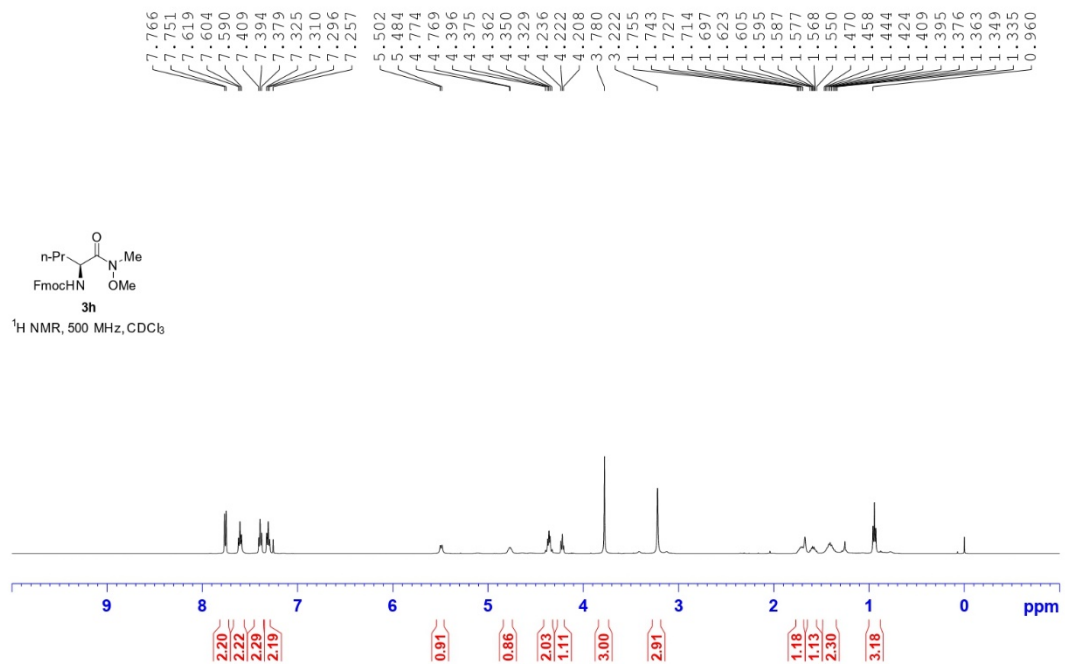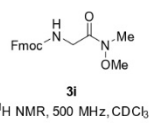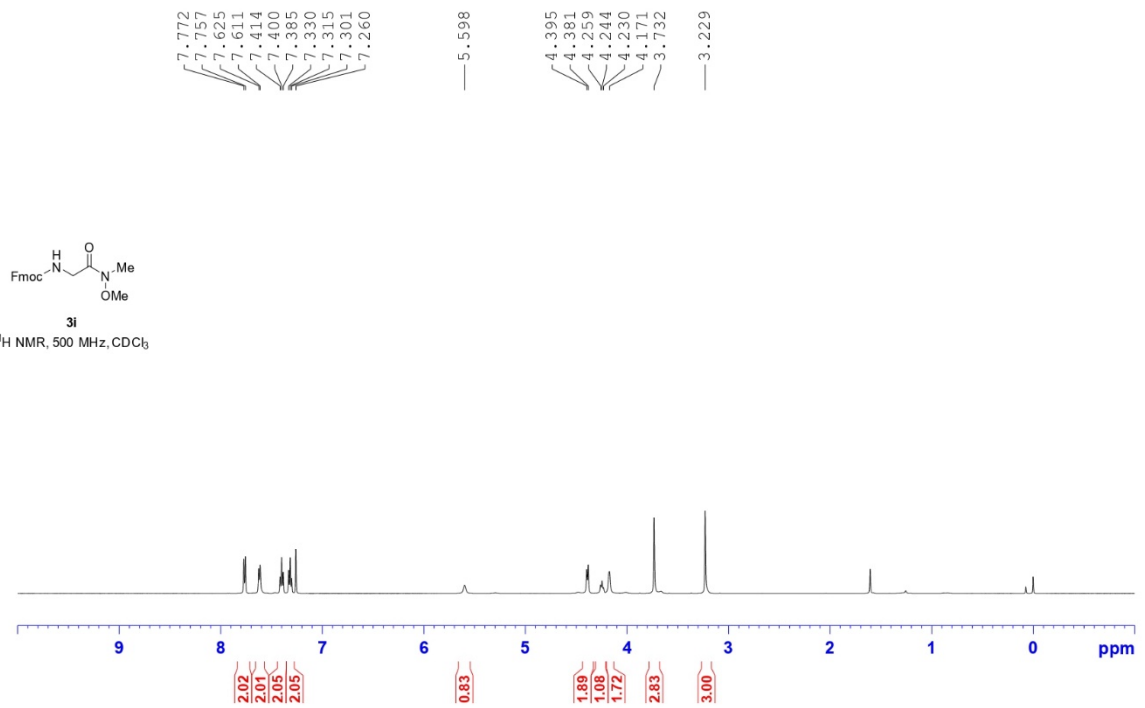

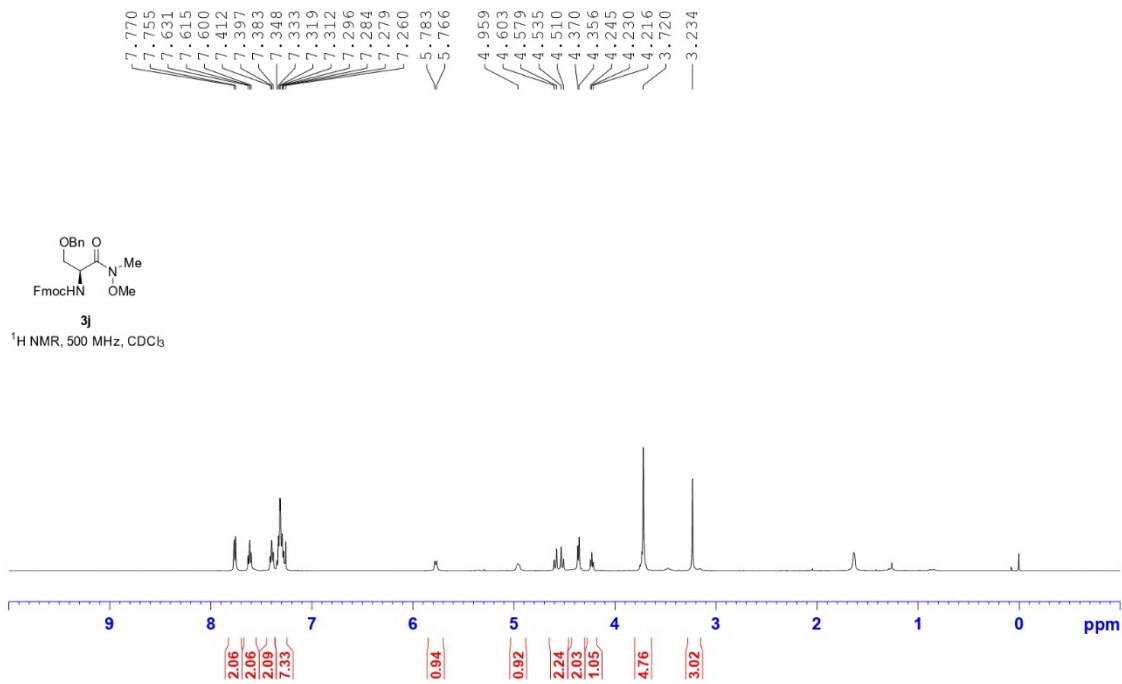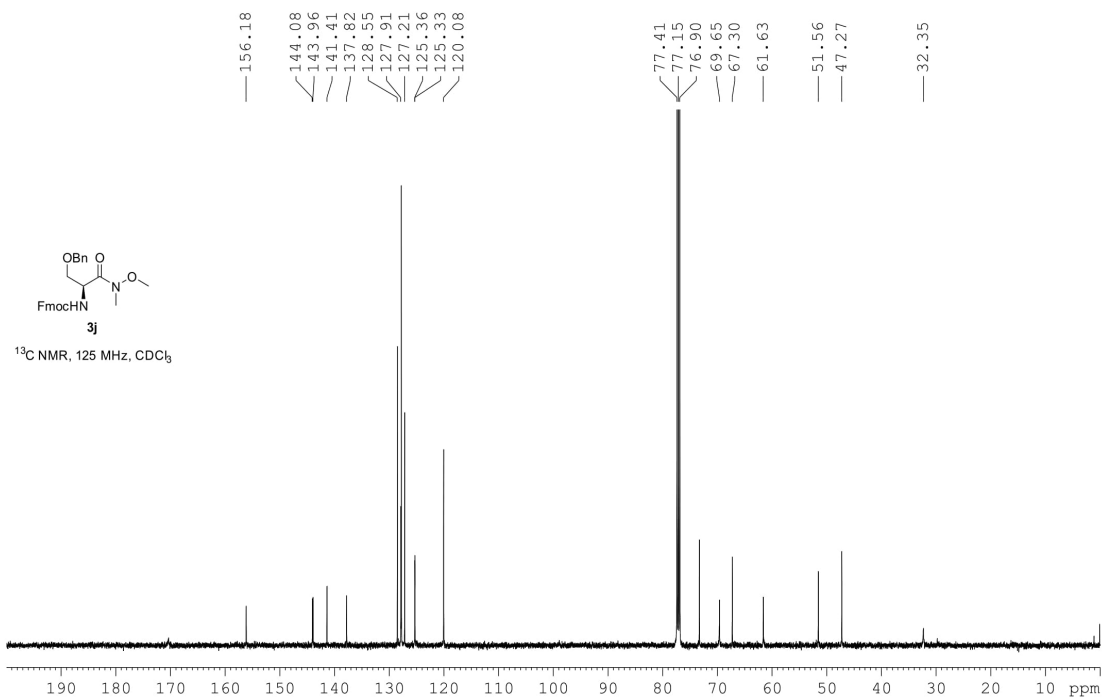

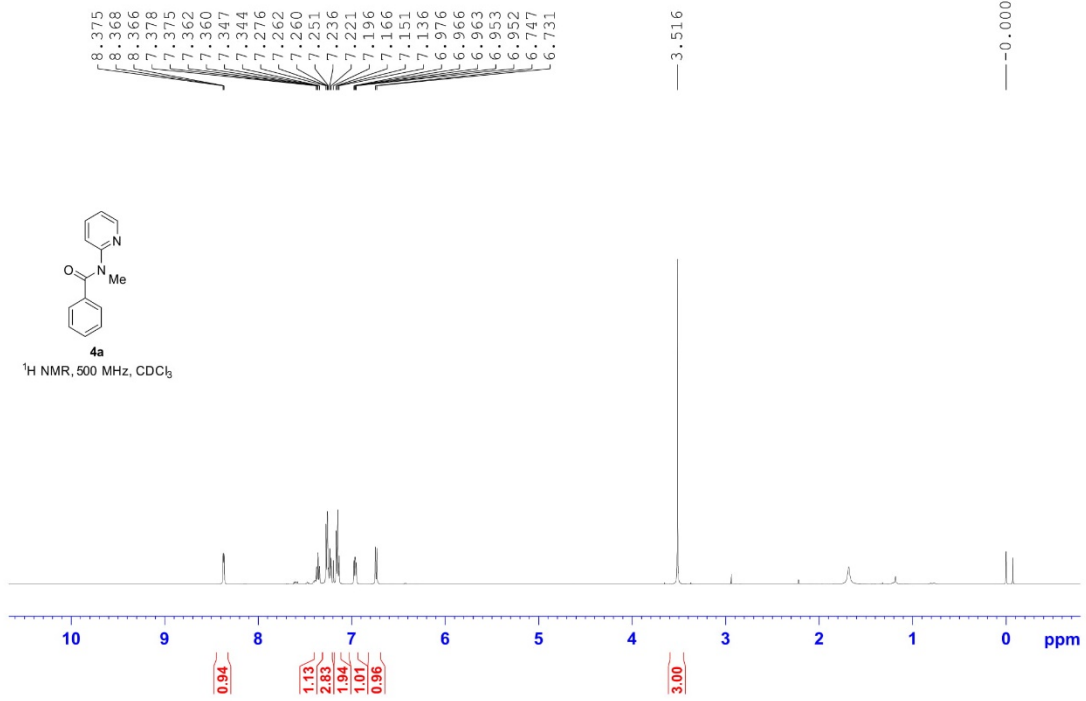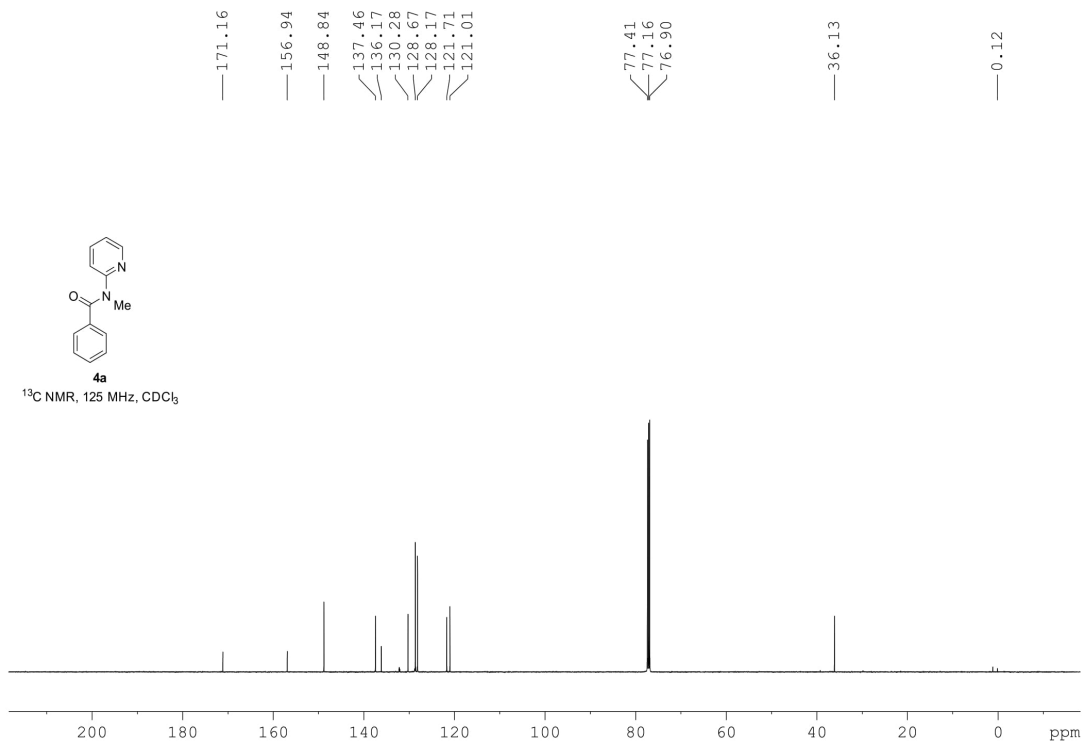

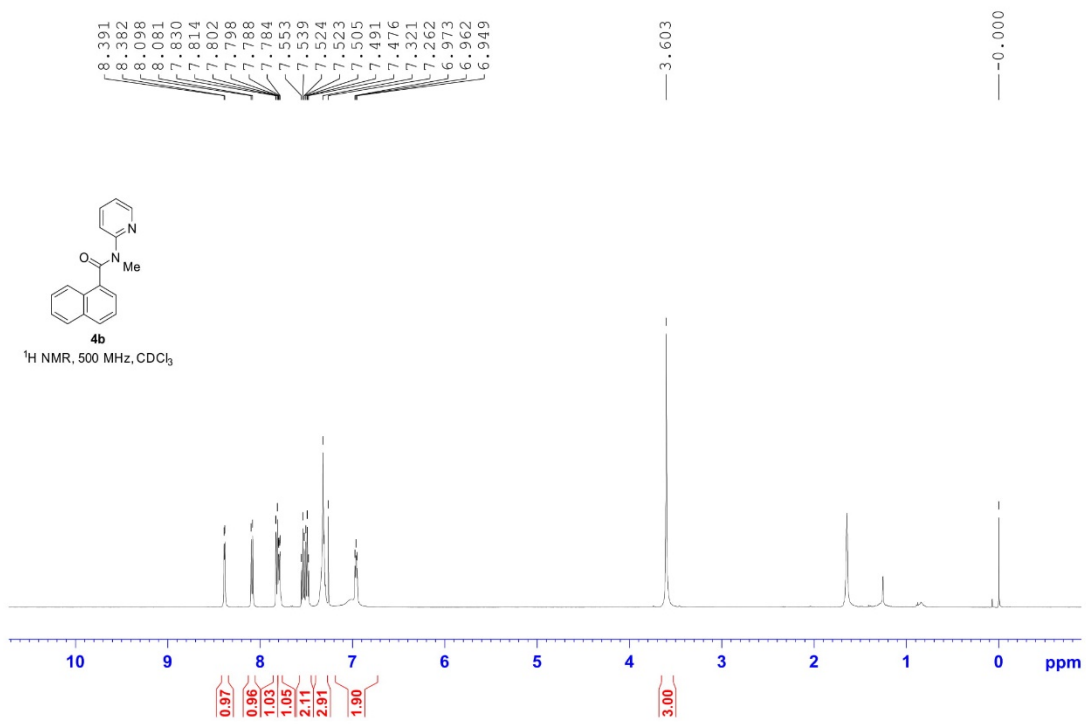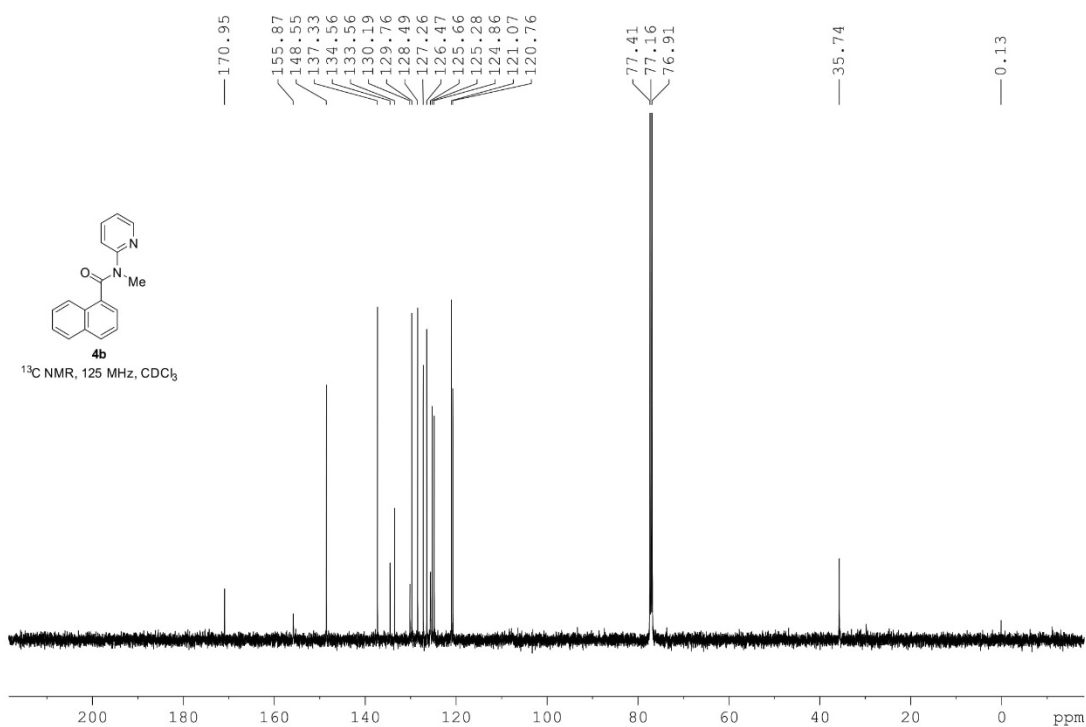



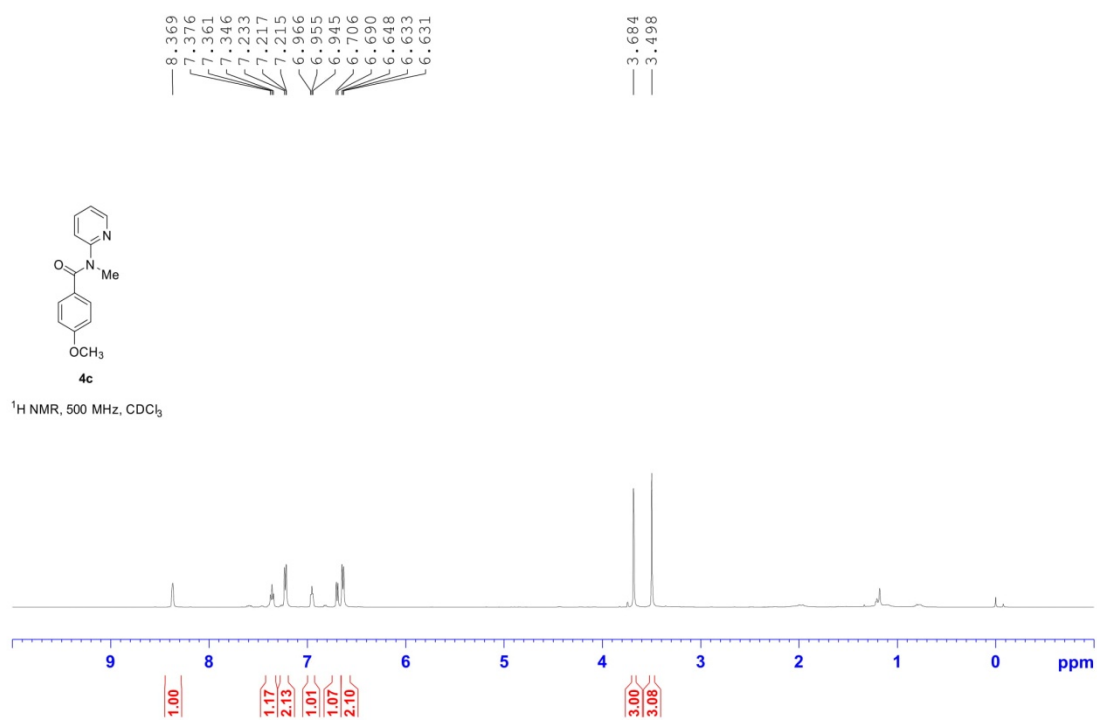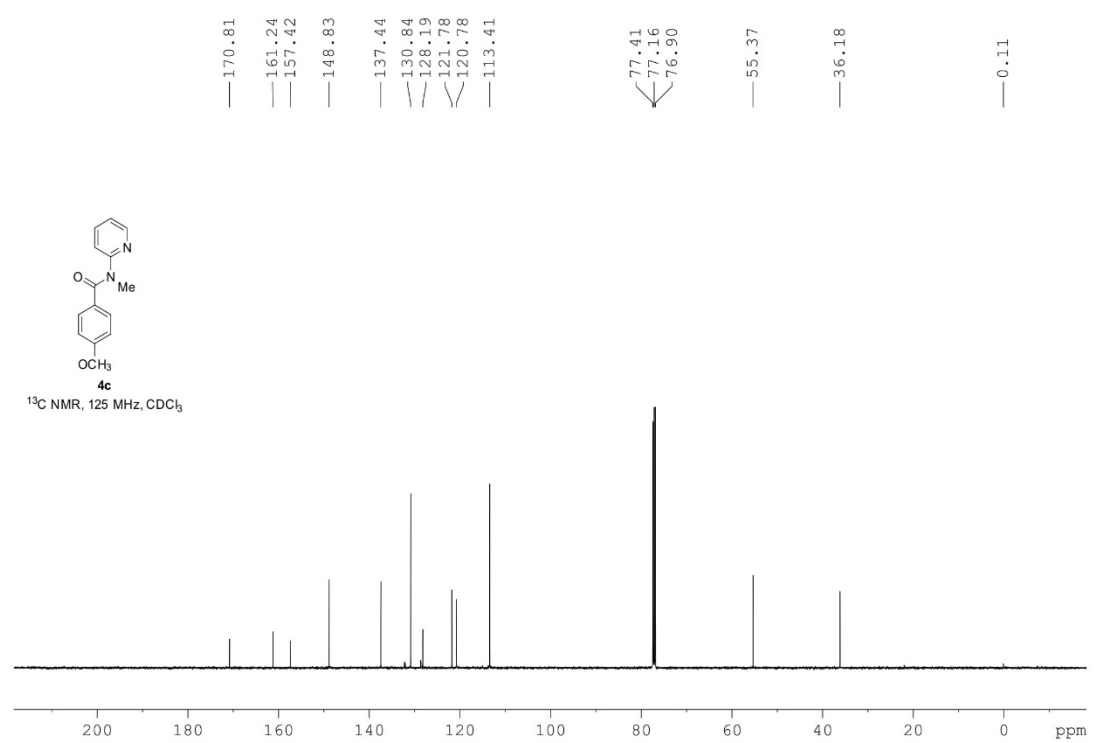

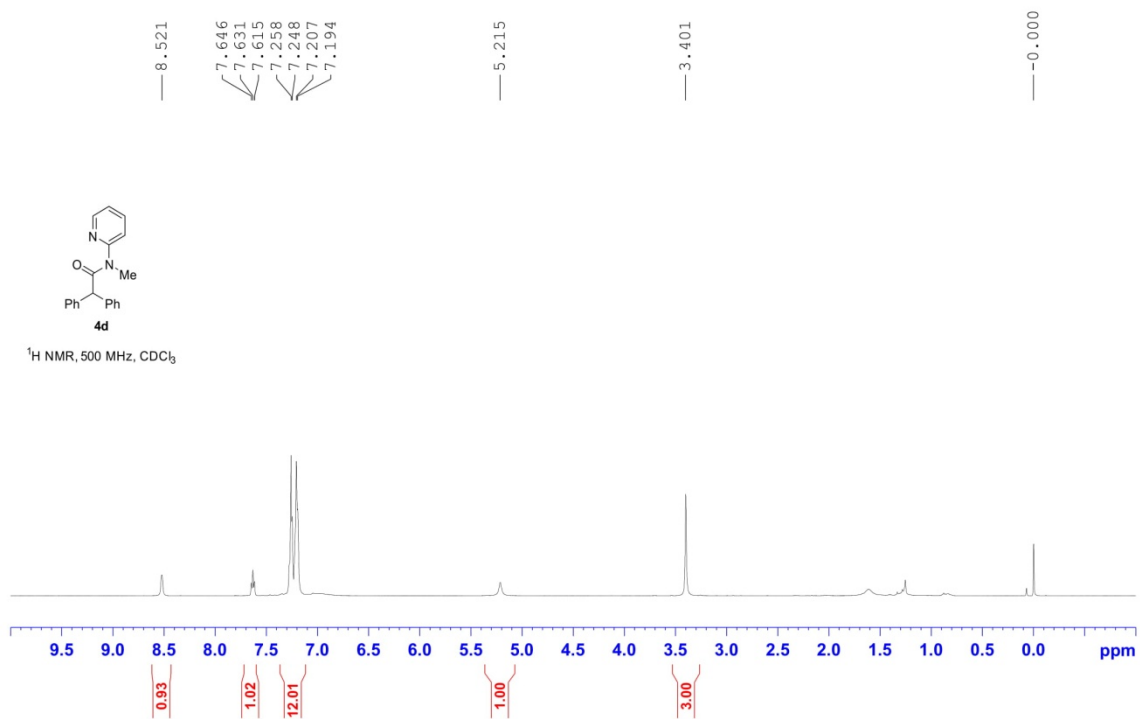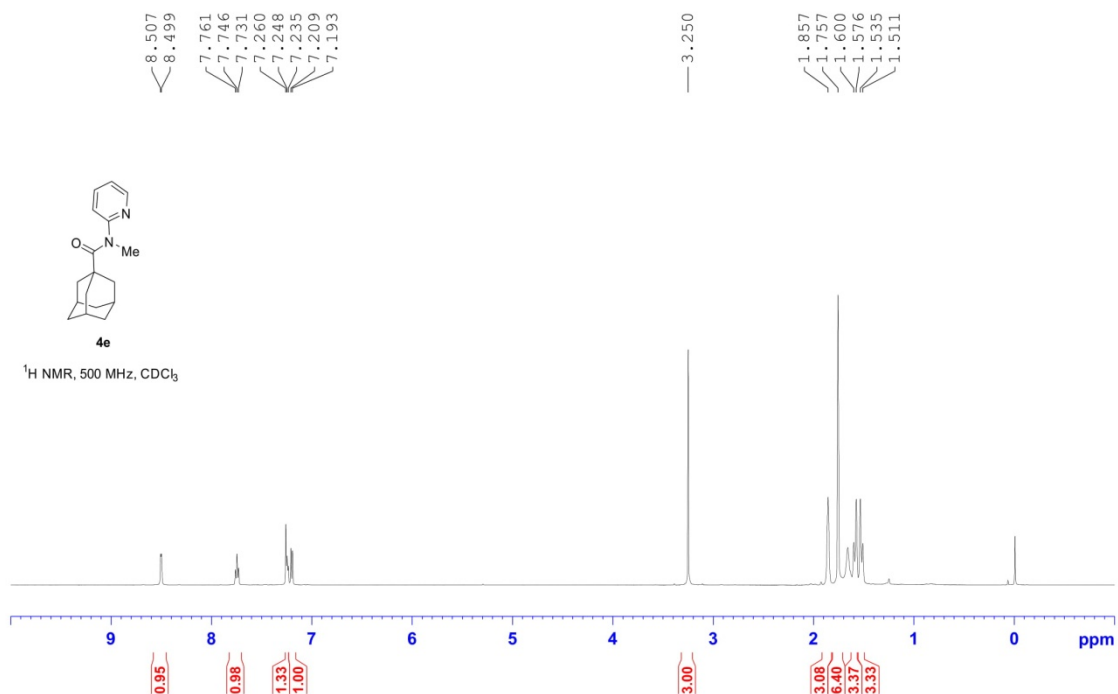

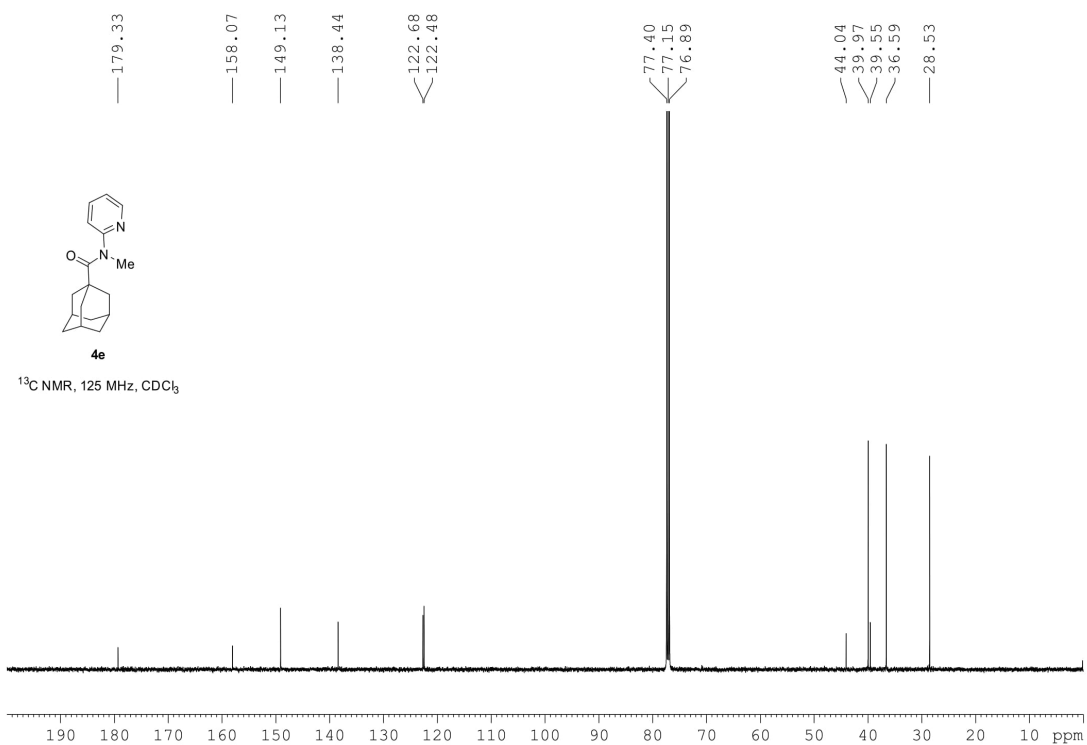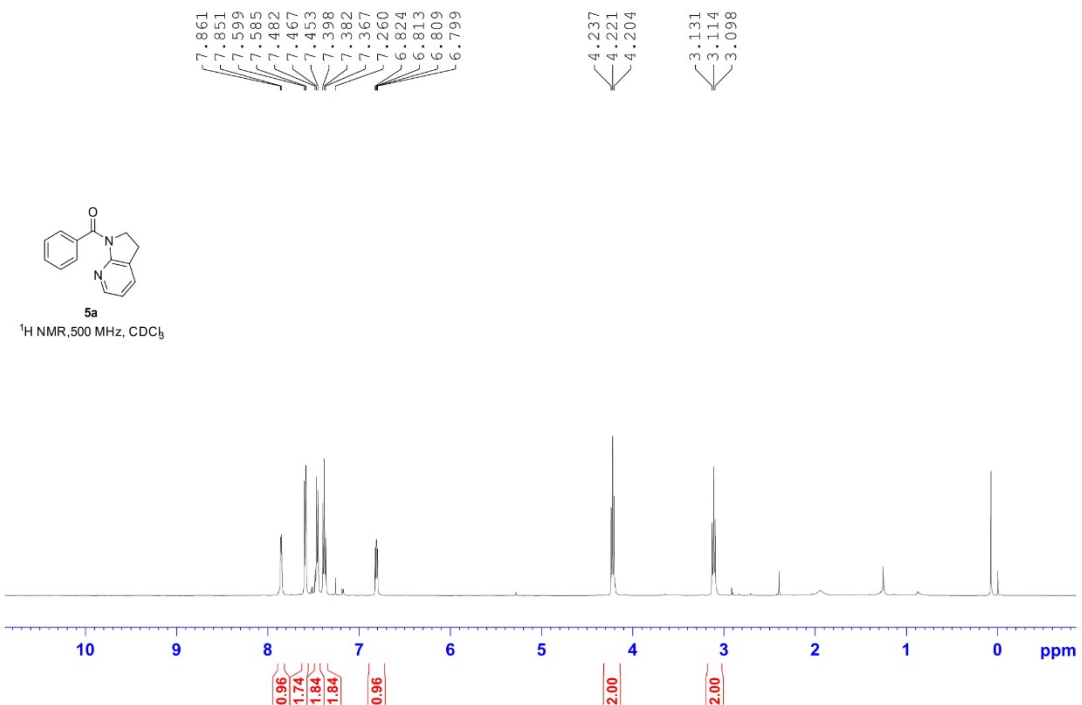

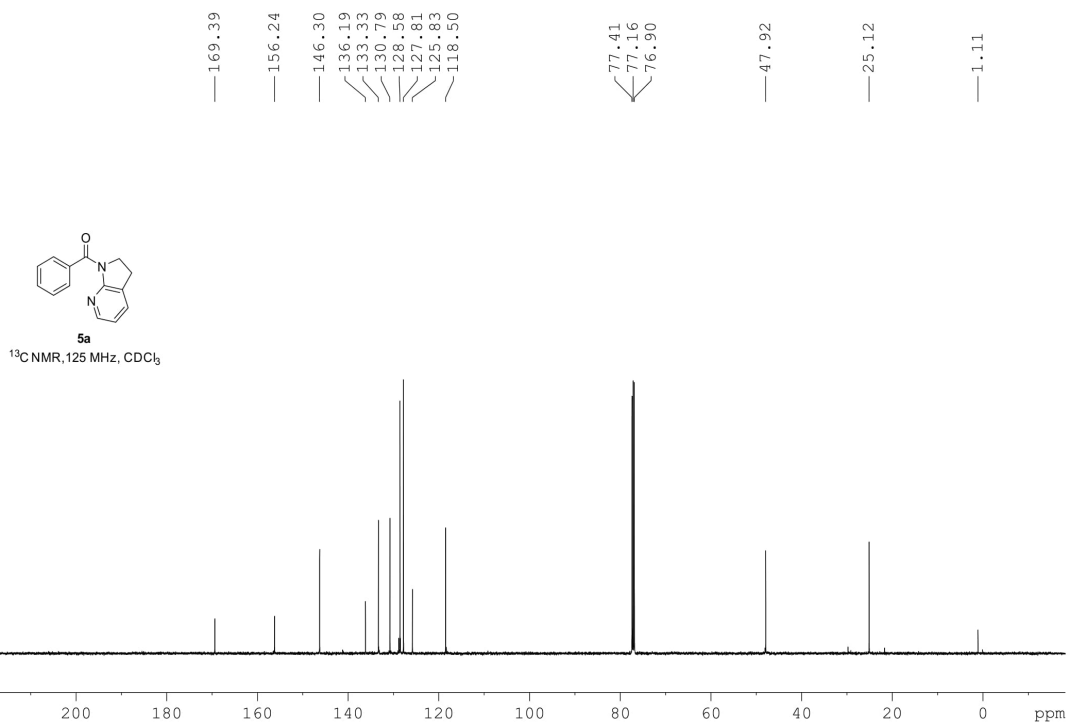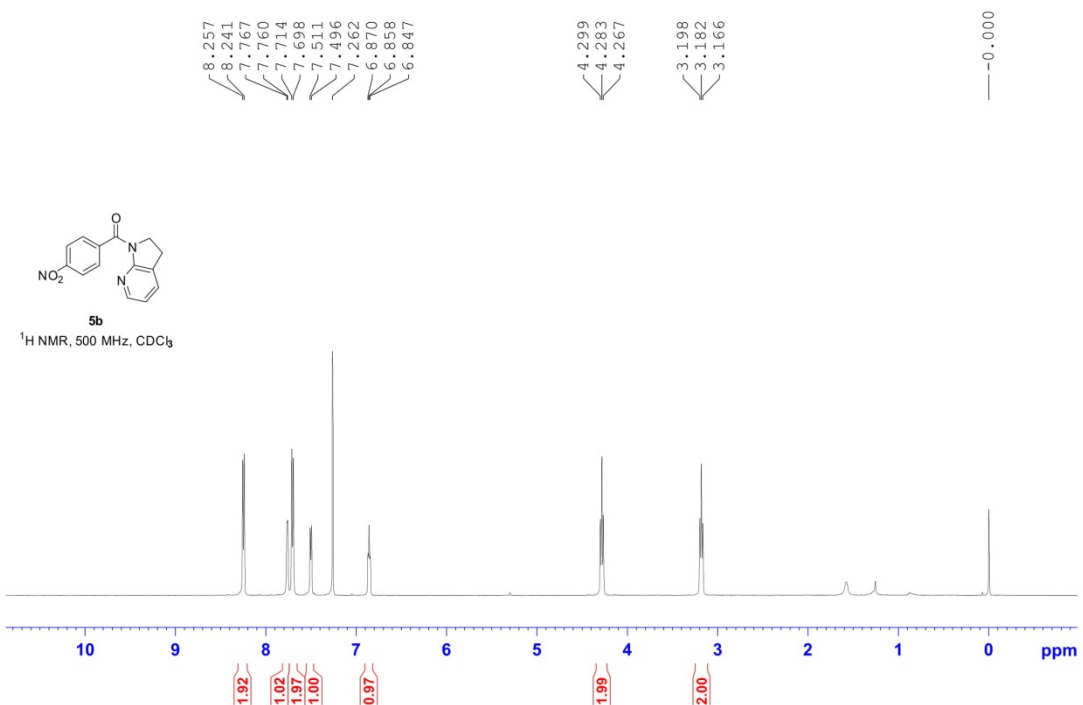

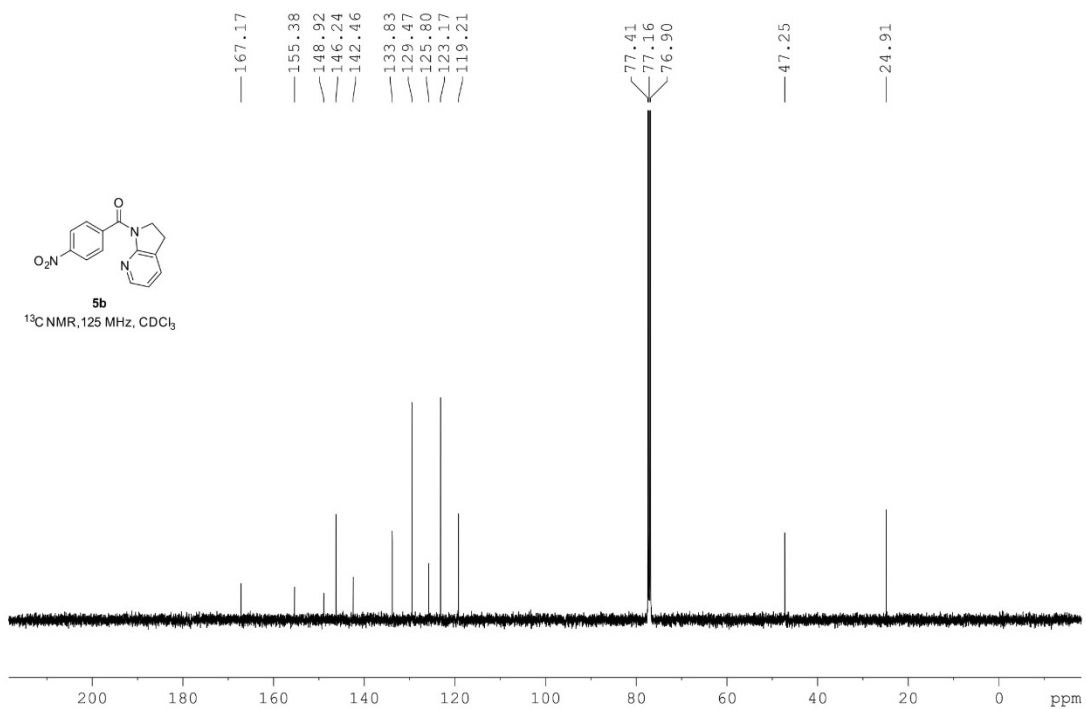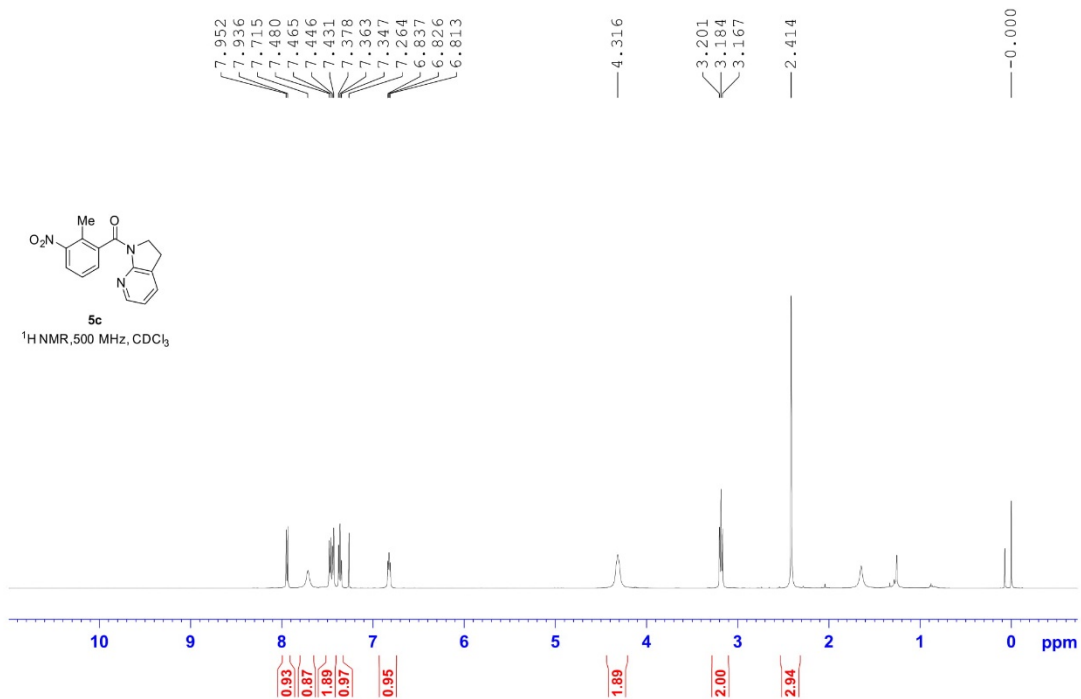

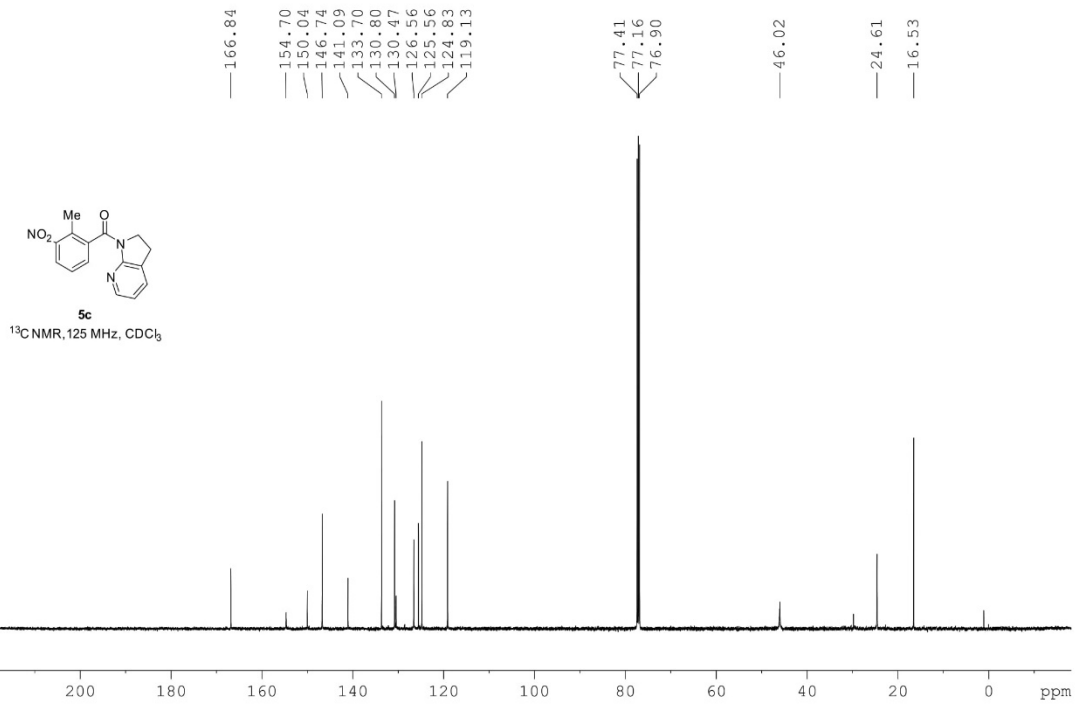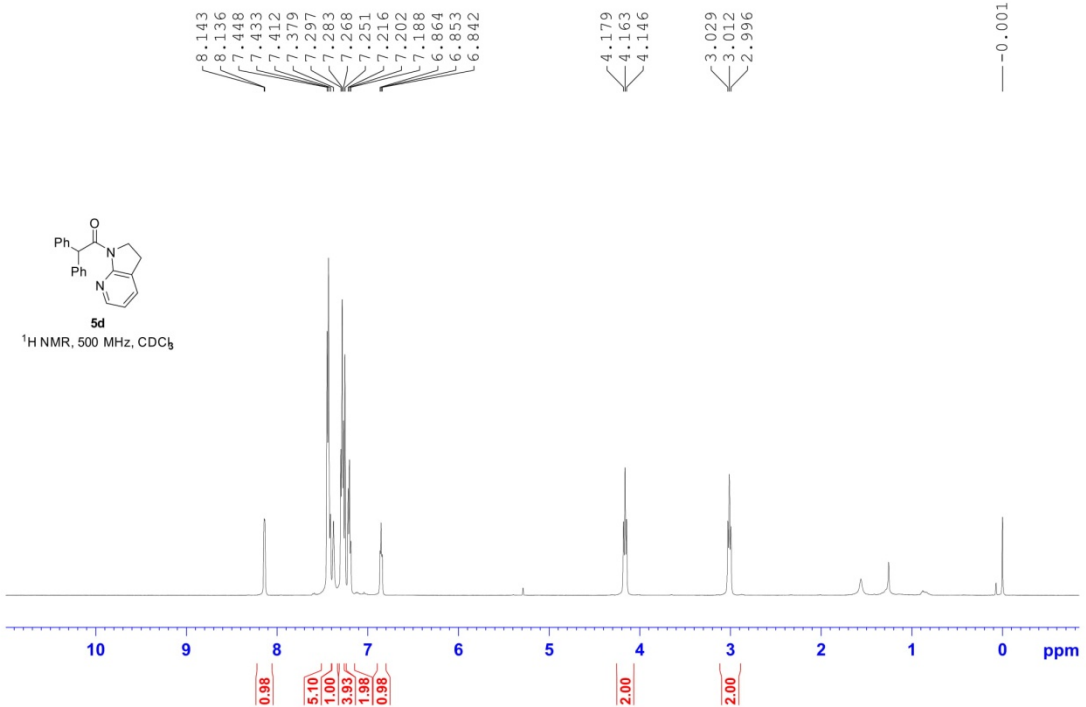

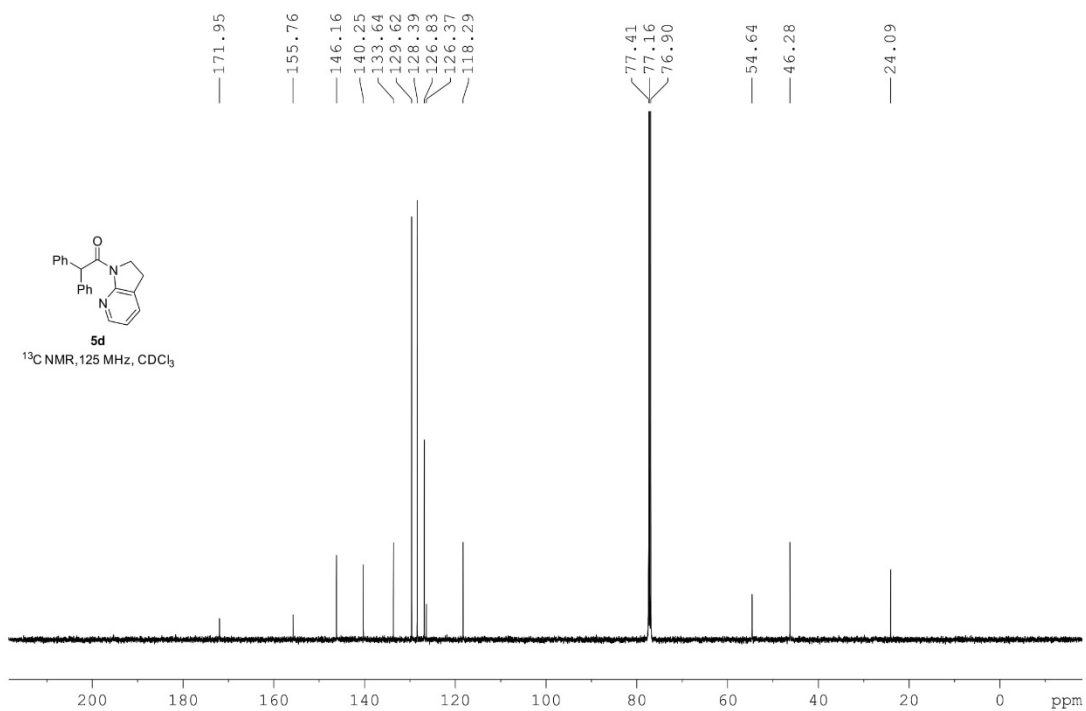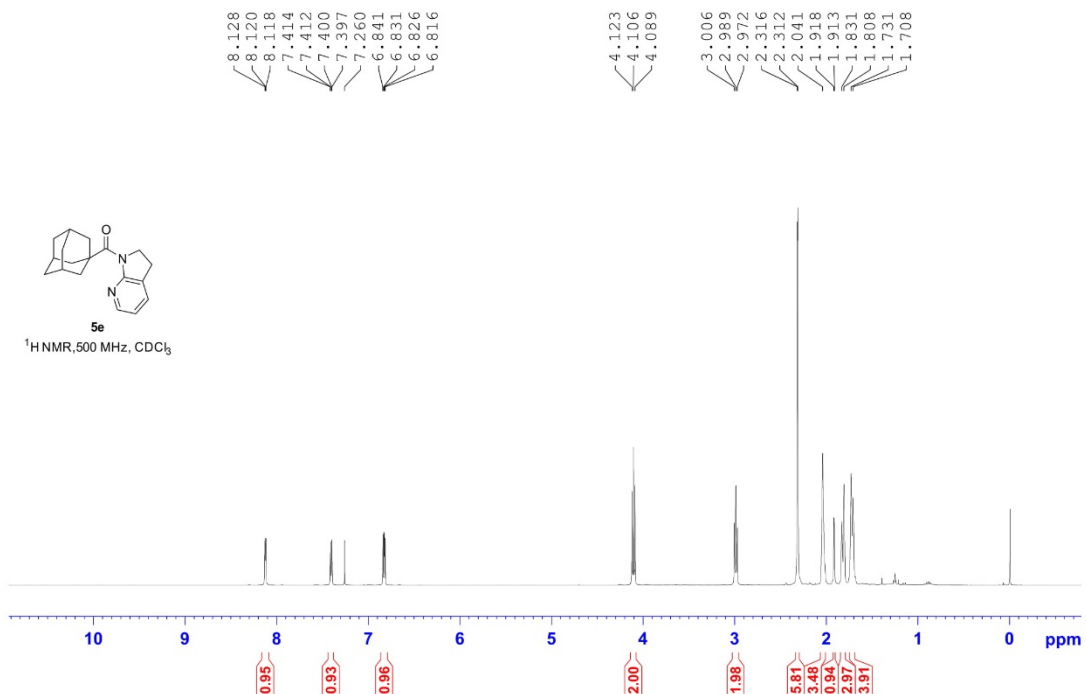

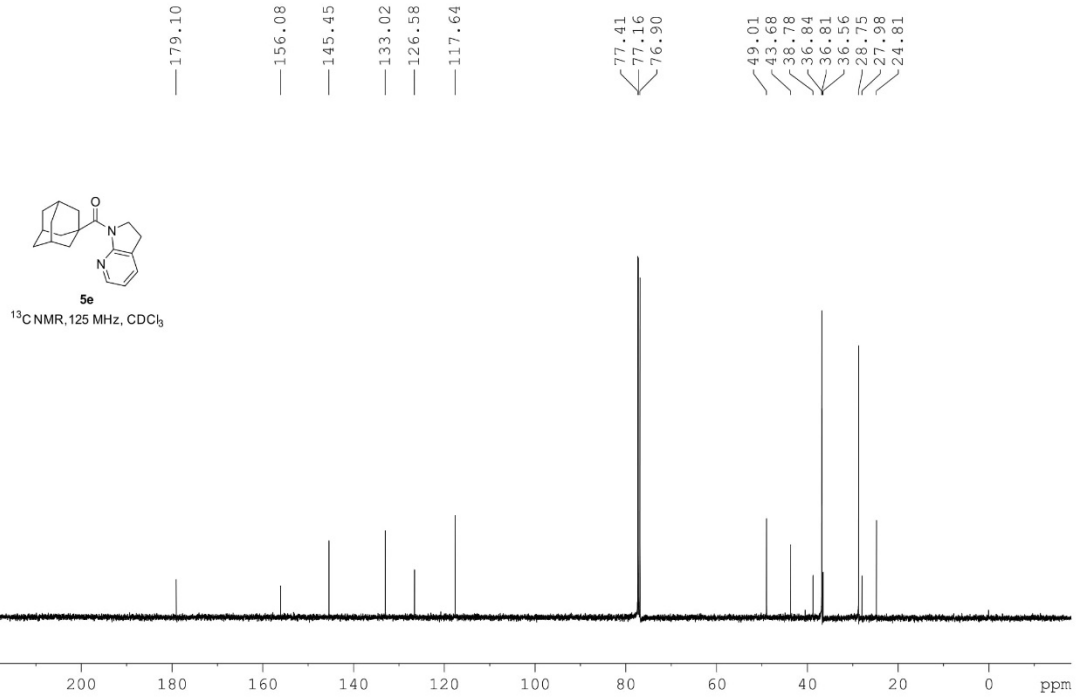

Supplement: Supplementary file 1 [file 22295106]
